# Supplementary material for: 2-Picolinic acid as a naturally occurring hydrogen bond donor for the preparation of cyclic carbonates from terminal/internal epoxides and CO2
Source: Royal Society of Chemistry journal article supplement (doi:10.1039/d2gc02146c), 2022-01-01

## Supplementary Information

### **2-Picolinic acid as a naturally occurred hydrogen bond donor for the preparation of cyclic carbonates from terminal/internal epoxides and CO<sub>2</sub>**

Ali Rostami,<sup>\*a</sup> Amirhossein Ebrahimi,<sup>a</sup> Mohammed Al-Jassasi,<sup>a</sup> Saber Mirzaei<sup>b</sup> and Ahmed Al-Harrasi<sup>\*a</sup>

<sup>a</sup>*Natural and Medical Sciences Research Center (NMSRC), University of Nizwa, 616, Nizwa, Sultanate of Oman, Email: [arostami@unizwa.edu.om](mailto:arostami@unizwa.edu.om), [aharrasi@unizwa.edu.om](mailto:aharrasi@unizwa.edu.om)*

<sup>b</sup>*Department of Chemistry, University of Pittsburgh, 219 Parkman Ave., Pittsburgh, Pennsylvania 15260, USA.*

#### **Table of Contents**

|                                                                                                                          |     |
|--------------------------------------------------------------------------------------------------------------------------|-----|
| I. <sup>1</sup> H NMR titration of pyridine-2-carboxylic acid ( <b>3a</b> ) –epichlorhydrin ( <b>1n</b> ) solutions----- | S2  |
| II. Details of computational studies-----                                                                                | S3  |
| III. References-----                                                                                                     | S27 |
| IV. <sup>1</sup> H NMR, <sup>13</sup> C NMR selected spectra -----                                                       | S28 |

## I. $^1\text{H}$ NMR titration of pyridine-2-carboxylic acid (**3a**) and epichlorohydrin (**1n**)

The  $^1\text{H}$  NMR investigation was carried out in  $\text{DMSO-}d_6$  because of the insolubility of pyridine-2-carboxylic acid (**3a**) in  $\text{CDCl}_3$ . The spectra of the pure substances were measured by dissolving 0.25 mmol of each compound in 0.5 mL  $\text{DMSO-}d_6$ . For the spectra containing mixtures of epichlorohydrin (**1n**) and pyridine-2-carboxylic acid (**3a**), **1n** (0.25 mmol) was dissolved in 0.5 mL  $\text{DMSO-}d_6$  and the suitable amount of **3a** was added in order to establish epichlorohydrin with pyridine-2-carboxylic acid molar ratios of 1:0, 1:1, 1:2 and 1:3.

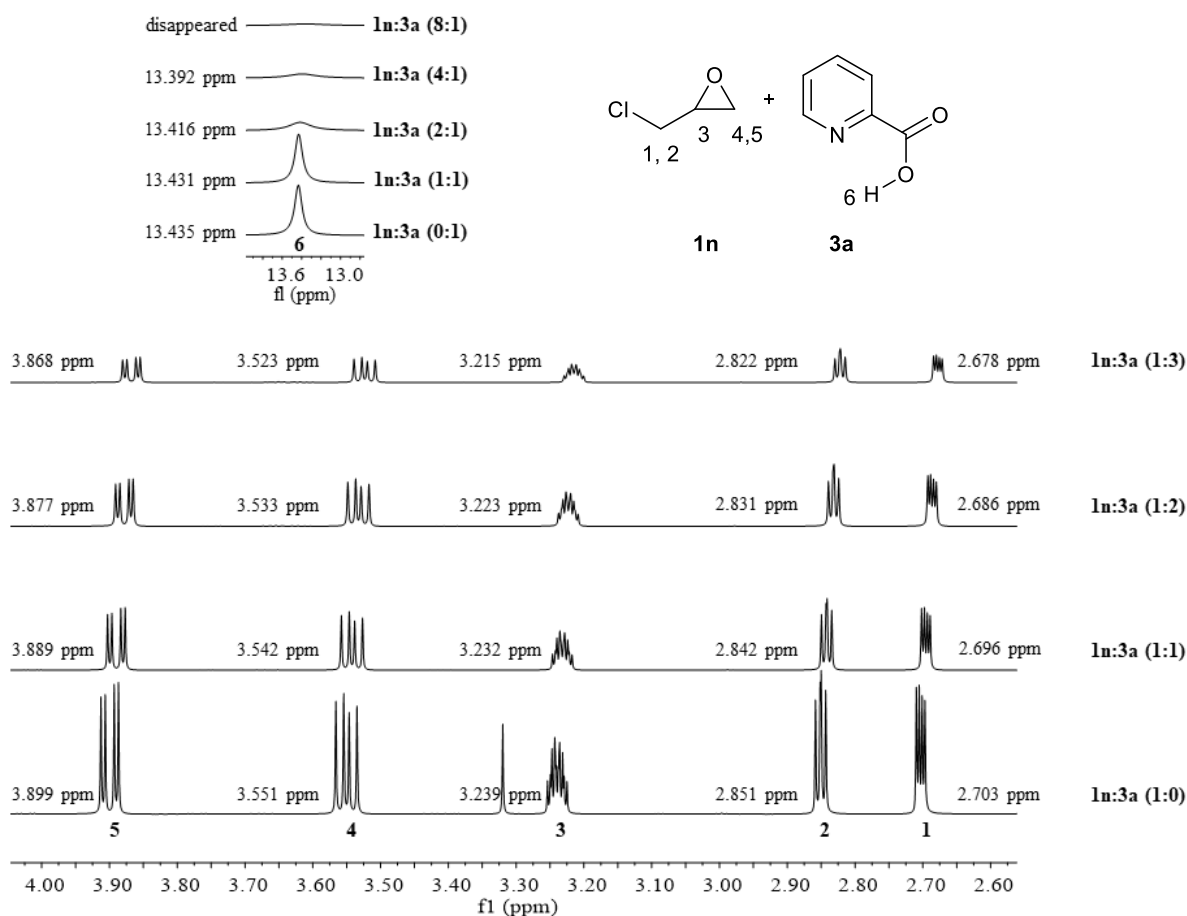

**Figure S1.** (a) Up field changes in the  $^1\text{H}$  NMR spectrum of epichlorohydrin (**1n**) upon addition of pyridine-2-carboxylic acid (**3a**) at room temperature (below): (i) free **1n**, (ii) **1n:3a** = 1:1, (iii) **1n:3a** = 1:2, (iv) **1n:3a** = 1:3; (b) Up field changes of the OH proton signal of **3a** upon addition of **1n** (above): (**1n:3a** = 0:1  $\rightarrow$  8:1)

## II. Details of computational studies

All calculations were carried out using Gaussian 16 software package.<sup>1</sup> The M06-2X<sup>2</sup> functional of density functional theory and Def-TZVPP<sup>3, 4</sup> basis set has been used for all optimizations and frequency calculations. In addition of DFT, the gas-phase acidities were calculated using high-level compound energy calculation method G3MP2<sup>4</sup> and the results are compared. The gas-phase acidities were calculated as the differences in SCF energy of the neutral and anionic form of the investigated molecules. The intrinsic reaction coordinate (IRC) calculation is carried out, in addition to the presence of one imaginary frequency, for the transition state structures. The implicit solvation effects were included using the PCM solvation model<sup>5</sup> with standard parameters of cyclohexanone ( $\epsilon = 15.619$ ) and styrene oxide using parameters  $\epsilon = 16.0$ ,  $n^2 = 1.865956$ ; these parameters have been used previously for styrene oxide as the media for similar reactions.<sup>6</sup> The solvation effects calculated using single point energy at M06-2X/Def2-QZVPP level of theory and thermal correction to free energy is taken from the gas phase optimization. Interestingly, both solvents (cyclohexanone and styrene oxide) showed very similar results which can be contributed to the similar dielectric constant. The noncovalent interaction plots were obtained using NCI plot software.<sup>7</sup> Snapshots were generated with the Visual Molecular Dynamics (VMD) package.<sup>8</sup>

### i) Conformational studies of 3a

Pyridine-2-carboxylic acid can exhibit two different conformations (conformer **I** and **II**) with respect to the rotation of acidic OH group. Conformer **I** that holds an intramolecular hydrogen bond with the pyridine nitrogen atom is more stable by  $\sim 2.9$  kcal/mol ( $\Delta G$ ). Note that the zwitterionic form (conformer **III**) is around 19.6 kcal/mol less stable, thus we did not consider conformer **III** for the mechanistic studies

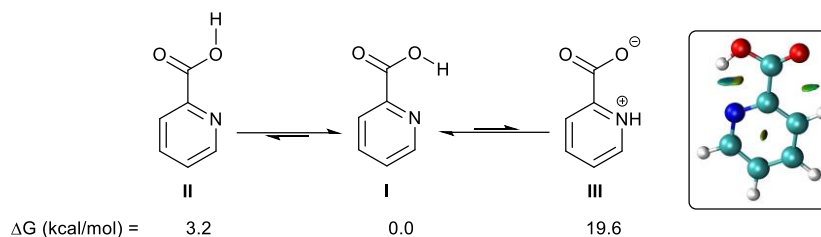

**Figure S2.** The relative energies ( $\Delta G$ , in kcal/mol) of the two conformers and zwitterion of 2-picolinic acid calculated at the M06-2X/Def2-TZVPP level of theory; The NCI plot of most stable conformer showing intramolecular hydrogen-bond interaction.

ii) **Potential energy surfaces of the reaction of propylene oxide (PO) and CO<sub>2</sub> by different pyridine carboxylic acid regioisomers**

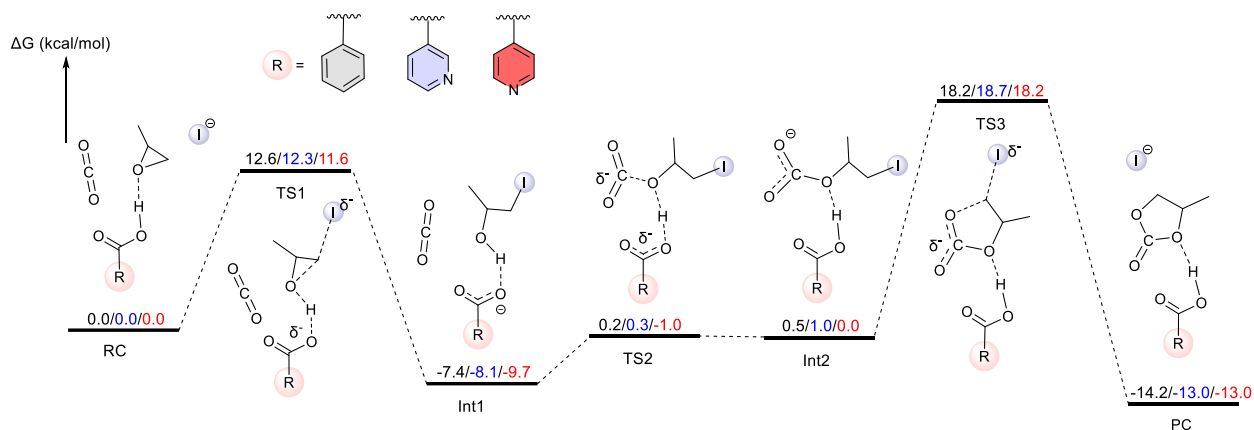

**Figure S3.** The relative energy profile ( $\Delta G$ , in kcal/mol) of benzoic acid (**3f**) and pyridine-3 (**3b**), and -4- (**3c**) carboxylic acid-catalyzed [3 + 2] cycloaddition of propylene epoxide (PO) and CO<sub>2</sub> calculated at the M06-2X/Def2-TZVPP level of theory. Energies of reactants in comparison to the energies of complexed reactants were used to define the relative energies.

**3a:**  $\Delta G_{\text{Int 1}} = 2.6$  kcal/mol;  $\Delta G_{\text{RDS}} = 19.2$  kcal/mol

**3b:**  $\Delta G_{\text{Int 1}} = -8.1$  kcal/mol;  $\Delta G_{\text{RDS}} = 26.8$  kcal/mol

**3c:**  $\Delta G_{\text{Int 1}} = -9.7$  kcal/mol;  $\Delta G_{\text{RDS}} = 27.9$  kcal/mol

|      | <b>3f</b>  |           | <b>3a</b>  |           | <b>3b</b>  |           | <b>3c</b>  |           |
|------|------------|-----------|------------|-----------|------------|-----------|------------|-----------|
|      | <b>CYC</b> | <b>SO</b> | <b>CYC</b> | <b>SO</b> | <b>CYC</b> | <b>SO</b> | <b>CYC</b> | <b>SO</b> |
| RC   | 0.0        | 0.0       | 0.0        | 0.0       | 0.0        | 0.0       | 0.0        | 0.0       |
| TS1  | 19.5       | 19.5      | 23.4       | 23.5      | 19.3       | 19.3      | 18.3       | 18.4      |
| Int1 | 0.6        | 0.6       | 3.0        | 3.0       | 0.3        | 0.3       | -1.3       | -1.3      |
| TS2  | 9.5        | 9.5       | 13.7       | 13.7      | 9.6        | 9.6       | 8.3        | 8.3       |
| Int2 | 3.7        | 3.7       | 9.8        | 9.8       | 4.7        | 4.7       | 3.9        | 3.9       |
| TS3  | 23.5       | 23.5      | 22.6       | 22.6      | 24.5       | 24.5      | 24.0       | 24.0      |
| PC   | -12.6      | -12.6     | -12.4      | -12.4     | -11.3      | -11.3     | -11.5      | -11.5     |

**Table S1.** The relative energy ( $\Delta G$ , in kcal/mol) of benzoic acid (**3f**) and pyridine-2 (**3a**), -3- (**3b**) and -4- (**3c**) carboxylic acid-catalyzed [3 + 2] cycloaddition of propylene epoxide (PO) and CO<sub>2</sub> calculated at the M06-2X/Def2-QZVPP+PCM(solvent)//M06-2X/Def2-TZVPP level of theory; solvent = cyclohexanone (CYC) and styrene oxide (SO).

iii) The dimerization energy of 3a–c, and 3f:

|        | Benzoic acid (3f) | Pyridine-2-carboxylic acid (3a) <sup>b</sup> | Pyridine-3-carboxylic acid (3b) | Pyridine-4-carboxylic acid (3c) |
|--------|-------------------|----------------------------------------------|---------------------------------|---------------------------------|
| M06-2X | -17.4             | -8.0                                         | -17.1                           | -17.1                           |

**Table S2.** Dimerization energy ( $\Delta E + \text{ZPE}$ , in kcal/mol =  $E_{\text{dimer}} - E_{\text{monomer} \times 2}$ ). All data are from the optimized structures at the M06-2X/Def2-TZVPP level of theory

iv) Gas-phase bond length changes upon hydrogen bond interaction between propylene oxide (PO) and different acids

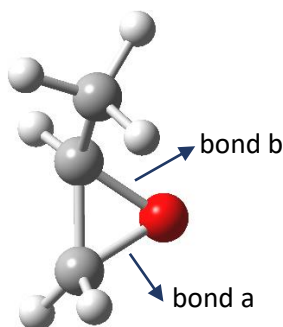

|                                 | bond a (Å) | bond b (Å) | Complexation Energy |
|---------------------------------|------------|------------|---------------------|
| Propylene oxide (PO)            | 1.417      | 1.417      |                     |
| Benzoic acid (3f)               | 1.429      | 1.431      | -10.3               |
| Pyridine-2-carboxylic acid (3a) | 1.421      | 1.423      | -5.7                |
| Pyridine-3-carboxylic acid (3b) | 1.430      | 1.432      | -10.6               |
| Pyridine-4-carboxylic acid (3c) | 1.430      | 1.432      | -10.8               |

**Table S3.** Gas-phase bond length changes upon hydrogen bond interaction between epoxide and different acids (the bonds **a** and **b** shown in the 2D structure of epoxide) and complexation energy ( $\Delta E + \text{ZPE}$ , in kcal/mol =  $E_{\text{complex}} - E_{\text{epoxide+acid}}$ ). All data are from the optimized structures at the M06-2X/Def2-TZVPP level of theory.

v) **Gas-phase acidities of 3a–c, and 3f employed in the cycloaddition of CO<sub>2</sub> to epoxides**

|                           | <b>Benzoic acid (3f)</b> | <b>Pyridine-2-<br/>carboxylic acid<br/>(3a)<sup>b</sup></b> | <b>Pyridine-3-<br/>carboxylic acid<br/>(3b)</b> | <b>Pyridine-4-<br/>carboxylic acid<br/>(3c)</b> |
|---------------------------|--------------------------|-------------------------------------------------------------|-------------------------------------------------|-------------------------------------------------|
| M06-2X                    | 348.4                    | 353.2                                                       | 343.8                                           | 341.5                                           |
| G3MP2                     | 339.1                    | 343.7                                                       | 334.5                                           | 332.5                                           |
| Experimental <sup>a</sup> | 340.1 ± 2.2              | ---                                                         | 334.4 ± 2.0                                     |                                                 |

**Table S4.** Gas-phase acidities (kcal/mol) using M06-2X/Def2-TZVPP and G3MP2 methods.

<sup>a</sup>The experimental gas-phase acidity values are obtained from the NIST Database (<http://webbook.nist.gov>).

<sup>b</sup>Calculated using the most stable conformer (conformer I).

vi) **Cartesian Coordinates (M06-2X/Def2-TZVPP)**

**Benzoic Acid (3f)**

**RC**

-1 1

|   |             |             |             |
|---|-------------|-------------|-------------|
| C | -4.08623300 | -0.74439500 | -0.06621300 |
| C | -4.66511100 | -1.79656600 | 0.63447100  |
| C | -6.03828100 | -1.97954500 | 0.60108500  |
| H | -4.01884700 | -2.45665200 | 1.19676400  |
| H | -6.48817300 | -2.79850600 | 1.14632300  |
| H | -1.14410500 | 0.52011500  | -0.60355000 |
| C | 1.20229600  | -0.37497700 | -0.47204700 |
| C | 0.97379200  | 0.32695900  | 0.78584500  |
| H | 0.24355400  | -0.10966300 | 1.45861100  |
| O | 0.35771700  | 0.79912500  | -0.43582100 |
| H | 2.15182900  | -0.23830900 | -0.97397600 |
| H | 0.65763600  | -1.29250100 | -0.65687000 |
| C | 2.01210800  | 1.22599000  | 1.37487500  |
| H | 1.54490100  | 2.04134700  | 1.92941700  |
| H | 2.65216700  | 0.64962300  | 2.04251800  |
| H | 2.65865900  | 1.61818700  | 0.59156200  |
| I | 4.98467800  | -0.66844800 | -0.18981800 |
| C | -6.25911200 | -0.06017400 | -0.83431300 |
| H | -6.88060300 | 0.61522400  | -1.40703100 |
| C | -2.59822900 | -0.58098700 | -0.00518100 |
| O | -2.15500800 | 0.44919600  | -0.70056200 |
| O | -1.88886800 | -1.33111300 | 0.62217900  |

|   |             |             |             |
|---|-------------|-------------|-------------|
| C | -1.20597400 | 3.06364100  | 0.19710700  |
| O | -1.17277100 | 2.68231200  | 1.28752100  |
| O | -1.25674900 | 3.47968600  | -0.87836700 |
| C | -4.88437500 | 0.12466400  | -0.80192700 |
| H | -4.41929300 | 0.93636800  | -1.34298400 |
| C | -6.83614100 | -1.11085700 | -0.13365200 |
| H | -7.90864500 | -1.25364600 | -0.16031300 |

## TS1

-1 1

|   |             |             |             |
|---|-------------|-------------|-------------|
| C | -3.33711400 | -0.89997700 | -0.07608300 |
| C | -3.58328300 | -2.19104500 | 0.37676400  |
| C | -4.88628000 | -2.64410200 | 0.51731500  |
| H | -2.73418500 | -2.81869900 | 0.61155900  |
| H | -5.07454200 | -3.64943600 | 0.87127400  |
| H | -0.68663800 | 1.10291600  | -0.70389700 |
| C | 1.77301200  | 0.33713200  | -0.83200200 |
| C | 1.33165900  | 1.16863300  | 0.27452000  |
| H | 0.80011000  | 0.61985600  | 1.05260600  |
| O | 0.47679900  | 1.60120700  | -0.77380800 |
| H | 2.41903900  | 0.76833600  | -1.57532000 |
| H | 1.23060400  | -0.57111800 | -1.03419000 |
| C | 2.25331400  | 2.23100300  | 0.80415400  |
| H | 1.69057000  | 2.95837700  | 1.38971100  |
| H | 3.01889400  | 1.77203400  | 1.42893000  |
| H | 2.74146500  | 2.74242900  | -0.02636400 |
| I | 3.94774300  | -1.09389600 | 0.00581000  |
| C | -5.70711500 | -0.51731200 | -0.25057000 |
| H | -6.53514700 | 0.13508700  | -0.49613200 |
| C | -1.90727300 | -0.43729300 | -0.21736300 |
| O | -1.78352800 | 0.78918100  | -0.61999400 |
| O | -0.98734200 | -1.19197800 | 0.03623100  |
| C | -1.35786900 | 3.40938900  | 0.30620800  |
| O | -1.05446500 | 3.04501300  | 1.36056900  |
| O | -1.68875200 | 3.83508700  | -0.71486300 |
| C | -4.40256100 | -0.06389400 | -0.38988700 |
| H | -4.19114400 | 0.93569700  | -0.74342000 |
| C | -5.95034600 | -1.80703700 | 0.20353100  |
| H | -6.96797000 | -2.16003900 | 0.31268600  |

## Int1

-1 1

|   |             |             |             |
|---|-------------|-------------|-------------|
| C | -3.11080800 | -0.77412600 | -0.18747500 |
| C | -3.27921300 | -2.12524000 | 0.09367500  |
| C | -4.53980400 | -2.63460500 | 0.37339900  |
| H | -2.39879600 | -2.75400300 | 0.08606200  |
| H | -4.66292800 | -3.68803100 | 0.59320300  |
| H | -0.16551000 | 1.55475600  | -1.00720400 |
| C | 2.11032200  | 0.09455000  | -0.95836400 |
| C | 1.56343200  | 1.25524600  | -0.13606800 |
| H | 0.97617000  | 0.84105100  | 0.69063600  |
| O | 0.73640900  | 1.99118100  | -1.00338900 |
| H | 2.72351900  | 0.44854200  | -1.78240600 |
| H | 1.29049300  | -0.53497700 | -1.28832600 |
| C | 2.63411700  | 2.18981000  | 0.39454100  |
| H | 2.15691000  | 3.01408800  | 0.92365400  |
| H | 3.31716000  | 1.68081400  | 1.07320100  |
| H | 3.20544900  | 2.60104000  | -0.44092000 |
| I | 3.38411900  | -1.23953900 | 0.17163000  |
| C | -5.48386200 | -0.44235300 | 0.09029300  |
| H | -6.34409300 | 0.21580900  | 0.08786300  |
| C | -1.71736100 | -0.22563200 | -0.49284100 |
| O | -1.66021000 | 1.01767800  | -0.70183100 |
| O | -0.78225400 | -1.03457400 | -0.51109000 |
| C | -1.12841600 | 3.33122100  | 0.58400000  |
| O | -0.68903900 | 2.81675000  | 1.52221500  |
| O | -1.58625000 | 3.92905100  | -0.29164900 |
| C | -4.22070800 | 0.06337600  | -0.18734900 |
| H | -4.06523900 | 1.11044200  | -0.41084900 |
| C | -5.64606200 | -1.79320800 | 0.37202500  |
| H | -6.63052200 | -2.18892100 | 0.58964500  |

## TS2

-1 1

|   |             |             |             |
|---|-------------|-------------|-------------|
| C | 3.61017200  | -0.40680700 | -0.06407100 |
| C | 4.03726400  | -1.65237100 | -0.50941300 |
| C | 5.38907300  | -1.96345900 | -0.52865900 |
| H | 3.28642800  | -2.35921500 | -0.83609900 |
| H | 5.71680800  | -2.93520100 | -0.87573300 |
| H | 0.66974000  | 1.38370500  | 0.37428000  |
| C | -1.79773900 | 0.01785700  | -0.44296500 |
| C | -1.43940600 | 0.84089000  | 0.78968700  |



|   |             |             |             |
|---|-------------|-------------|-------------|
| H | -2.32310500 | 1.40315300  | 1.10257200  |
| O | -0.46063200 | 1.76542500  | 0.39002600  |
| H | -0.97537200 | -0.62744000 | -0.73764100 |
| H | -2.11149300 | 0.66965300  | -1.25046900 |
| C | -0.91746900 | -0.00420100 | 1.94218500  |
| H | -0.56836400 | 0.65138800  | 2.73943200  |
| H | -1.70110200 | -0.65210700 | 2.33422900  |
| H | -0.08557100 | -0.62256800 | 1.60321800  |
| I | -3.49518200 | -1.27851100 | -0.11236900 |
| C | 5.90020700  | 0.21957100  | 0.34057200  |
| H | 6.62665000  | 0.95153900  | 0.67005000  |
| C | 2.12711200  | -0.09023000 | -0.05175600 |
| O | 1.83985300  | 1.06639500  | 0.41716900  |
| O | 1.33570200  | -0.92970500 | -0.46585800 |
| C | -0.99020400 | 3.25169600  | -0.47765600 |
| O | -2.17829400 | 3.20520000  | -0.50556800 |
| O | 0.01378600  | 3.81586600  | -0.74596400 |
| C | 4.54691100  | 0.52856200  | 0.36062500  |
| H | 4.19294600  | 1.49221000  | 0.69964100  |
| C | 6.32323400  | -1.02680100 | -0.10317800 |
| H | 7.37881300  | -1.26771500 | -0.11861100 |

## Int2

-1 1

|   |             |             |             |
|---|-------------|-------------|-------------|
| C | 3.68246900  | -0.39992400 | -0.06168700 |
| C | 4.06635900  | -1.67858500 | -0.44873900 |
| C | 5.40761000  | -2.02885700 | -0.46103100 |
| H | 3.29428500  | -2.37920300 | -0.73658600 |
| H | 5.70439300  | -3.02507500 | -0.76211100 |
| H | 0.98386100  | 1.39524700  | 0.33181700  |
| C | -1.88713000 | 0.05795900  | -0.45560800 |
| C | -1.52373700 | 0.88579500  | 0.76949200  |
| H | -2.39199300 | 1.47346100  | 1.07022100  |
| O | -0.49812800 | 1.77121300  | 0.36922900  |
| H | -1.06947700 | -0.59401900 | -0.74807600 |
| H | -2.20053200 | 0.71102800  | -1.26170100 |
| C | -0.99508600 | 0.05486400  | 1.92481900  |
| H | -0.65348700 | 0.71676800  | 2.72001500  |
| H | -1.77150500 | -0.59964000 | 2.31945100  |
| H | -0.15691000 | -0.55876700 | 1.59103700  |
| I | -3.58222100 | -1.23284300 | -0.10742000 |
| C | 5.98898200  | 0.17972300  | 0.29606700  |
| H | 6.73875000  | 0.90535200  | 0.58304500  |
| C | 2.21780600  | -0.05500400 | -0.06187100 |

|   |             |             |             |
|---|-------------|-------------|-------------|
| O | 1.97753500  | 1.15048100  | 0.37834800  |
| O | 1.38350400  | -0.85231300 | -0.43504600 |
| C | -0.88379800 | 3.00013400  | -0.41022800 |
| O | -2.09003300 | 3.10935900  | -0.57873600 |
| O | 0.11330200  | 3.62856700  | -0.70855700 |
| C | 4.64632600  | 0.53058500  | 0.31045100  |
| H | 4.32937700  | 1.52167100  | 0.60250500  |
| C | 6.37070200  | -1.09898600 | -0.08821300 |
| H | 7.41850600  | -1.37082500 | -0.09894100 |

### TS3

-1 1

|   |             |             |             |
|---|-------------|-------------|-------------|
| C | 3.47058900  | -0.35643200 | -0.05328300 |
| C | 3.70954900  | -1.43953300 | -0.89142100 |
| C | 4.96092700  | -2.03465200 | -0.91653900 |
| H | 2.89858300  | -1.79579100 | -1.51202800 |
| H | 5.14547500  | -2.87832400 | -1.56834000 |
| H | 1.05903600  | 1.62791800  | 0.74422300  |
| C | -2.16641700 | 0.83180800  | -0.49146300 |
| C | -1.62520800 | 1.30436900  | 0.85201900  |
| H | -2.40614800 | 1.90108000  | 1.33172300  |
| O | -0.50486000 | 2.15912800  | 0.61052000  |
| H | -1.48619900 | 0.34922000  | -1.17361400 |
| H | -3.13104800 | 1.13325000  | -0.83967900 |
| C | -1.10981800 | 0.24647800  | 1.81225800  |
| H | -0.53915600 | 0.74794400  | 2.59494000  |
| H | -1.92685400 | -0.31102600 | 2.25698500  |
| H | -0.46100900 | -0.45162900 | 1.28355100  |
| I | -3.35023800 | -1.42579200 | -0.02625200 |
| C | 5.74053600  | -0.46397800 | 0.73182500  |
| H | 6.53295900  | -0.08287700 | 1.36244900  |
| C | 2.10189200  | 0.25738800  | -0.05711600 |
| O | 1.97371600  | 1.23799500  | 0.81765100  |
| O | 1.22403500  | -0.13012700 | -0.78845200 |
| C | -0.60154900 | 2.93887400  | -0.57201500 |
| O | -1.61850400 | 2.64231400  | -1.24589100 |
| O | 0.29559900  | 3.73379100  | -0.74138100 |
| C | 4.48763800  | 0.13191500  | 0.75920300  |
| H | 4.28609300  | 0.97674000  | 1.40206200  |
| H | 6.95550300  | -2.01069300 | -0.12430200 |
| C | 5.97777100  | -1.54684300 | -0.10450200 |

**PC**

-1 1

|   |             |             |             |
|---|-------------|-------------|-------------|
| C | -4.07424500 | -0.37087800 | -0.00158700 |
| C | -4.51985500 | -0.81103200 | 1.23984000  |
| C | -5.80379000 | -1.31344000 | 1.37563900  |
| H | -3.84368200 | -0.74902400 | 2.08145700  |
| H | -6.15077400 | -1.65615900 | 2.34117800  |
| H | -1.44526200 | 0.90223800  | -1.31506700 |
| C | 1.36080000  | 0.80466900  | 0.96282000  |
| C | 1.24612100  | 0.57694300  | -0.54214100 |
| H | 2.15882100  | 0.88984400  | -1.04683400 |
| O | 0.19424600  | 1.51563200  | -0.90642800 |
| H | 0.80976700  | 0.05564600  | 1.53072500  |
| H | 2.39421100  | 0.85847000  | 1.28901200  |
| C | 0.86140100  | -0.82050700 | -0.94876500 |
| H | 0.70143500  | -0.87506700 | -2.02567300 |
| H | 1.68750300  | -1.48233200 | -0.68755800 |
| H | -0.04498000 | -1.13158200 | -0.42768300 |
| I | 4.61431800  | -0.80093200 | 0.03174200  |
| C | -6.20003900 | -0.93617900 | -0.96878000 |
| H | -6.85552300 | -0.98472300 | -1.82798000 |
| C | -2.68192100 | 0.16239900  | -0.10275400 |
| O | -2.35732000 | 0.54099000  | -1.33450800 |
| O | -1.93412000 | 0.23162500  | 0.84026600  |
| C | -0.02915300 | 2.38328600  | 0.10966800  |
| O | 0.71810700  | 2.07672800  | 1.16342200  |
| O | -0.79194500 | 3.29488600  | 0.03354200  |
| C | -4.91487100 | -0.43282400 | -1.10750500 |
| H | -4.55511600 | -0.08530100 | -2.06519100 |
| H | -7.64742700 | -1.76854800 | 0.37690000  |
| C | -6.64437900 | -1.37626500 | 0.27090700  |

**Pyridine-2-carboxylic acid (3a)****RC**

-1 1

|   |             |             |             |
|---|-------------|-------------|-------------|
| C | 2.40596600  | -1.98348900 | -0.00639700 |
| C | 2.54819200  | -3.35950900 | -0.10107000 |
| C | 1.39394500  | -4.12786500 | -0.13016000 |
| C | 0.16308800  | -3.49496300 | -0.06240300 |
| H | 3.53940600  | -3.78592900 | -0.14914900 |
| H | 1.45572600  | -5.20591400 | -0.20521000 |
| H | -0.76492800 | -4.04884200 | -0.08349000 |

|   |             |             |             |
|---|-------------|-------------|-------------|
| H | 2.45251000  | 0.42794900  | 0.10487200  |
| C | -0.02516900 | 1.35242600  | 1.02913900  |
| C | -0.18178700 | 1.43114700  | -0.41271800 |
| H | -0.19705400 | 0.49324700  | -0.95236600 |
| O | 1.09131200  | 1.71041400  | 0.20152600  |
| H | -0.40439100 | 2.16494600  | 1.63730100  |
| H | 0.05033500  | 0.38284900  | 1.50107900  |
| C | -0.88541700 | 2.58050500  | -1.06264500 |
| H | -0.42668200 | 2.82855100  | -2.02065400 |
| H | -1.92464600 | 2.29134500  | -1.22348000 |
| H | -0.86325000 | 3.46048800  | -0.41739500 |
| I | -3.37705200 | -0.37787400 | 0.03421500  |
| C | 0.12263700  | -2.10788200 | 0.03342200  |
| H | -0.82898900 | -1.58111500 | 0.08667400  |
| N | 1.23003900  | -1.37068500 | 0.05928200  |
| C | 3.63142800  | -1.10321400 | 0.02750300  |
| O | 3.40947100  | 0.19617800  | 0.09413600  |
| O | 4.74235800  | -1.56623400 | -0.00358500 |
| C | 1.78046200  | 4.26071400  | 0.05902700  |
| O | 2.21473100  | 4.12781300  | -1.00243500 |
| O | 1.36280000  | 4.47024600  | 1.11676300  |

## TS1

-1 1

|   |             |             |             |
|---|-------------|-------------|-------------|
| C | -2.95371200 | -0.85898400 | -0.04254200 |
| C | -3.83451900 | -1.93520700 | 0.00667600  |
| C | -3.31024700 | -3.20657400 | 0.16116900  |
| C | -1.93444400 | -3.35954100 | 0.25950900  |
| H | -4.89376000 | -1.74324200 | -0.07794000 |
| H | -3.96385800 | -4.06870200 | 0.20355700  |
| H | -1.48144000 | -4.33389300 | 0.37891600  |
| H | -1.62219000 | 1.42693800  | -0.12254400 |
| C | 1.02392600  | 0.49686000  | -0.52759000 |
| C | 0.58681300  | 1.01394100  | 0.76653400  |
| H | 0.07293200  | 0.27478100  | 1.38379900  |
| O | -0.27322200 | 1.76804500  | -0.03760200 |
| H | 1.67609700  | 1.12236200  | -1.11547900 |
| H | 0.38611600  | -0.20756200 | -1.02920200 |
| C | 1.57793400  | 1.82850200  | 1.56231200  |
| H | 1.05232400  | 2.41692900  | 2.31515900  |
| H | 2.30182000  | 1.17457000  | 2.04864200  |
| H | 2.11871800  | 2.50857400  | 0.90026600  |
| I | 2.87949800  | -1.33425200 | -0.15673800 |

|   |             |             |             |
|---|-------------|-------------|-------------|
| C | -1.13630600 | -2.22549100 | 0.19892500  |
| H | -0.05353700 | -2.29312400 | 0.26697300  |
| N | -1.63932200 | -1.00270900 | 0.05117700  |
| C | -3.51758800 | 0.54423300  | -0.21278200 |
| O | -2.68958700 | 1.53602600  | -0.22815700 |
| O | -4.72058600 | 0.66956300  | -0.32586800 |
| C | 0.24952700  | 4.31852800  | -0.24782200 |
| O | -0.33119300 | 4.57803100  | 0.71673000  |
| O | 0.85963200  | 4.16822300  | -1.21880400 |

### Int1

-1 1

|   |             |             |             |
|---|-------------|-------------|-------------|
| C | -2.97219000 | -0.31958000 | 0.13261300  |
| C | -4.09101200 | -1.07471700 | -0.22503600 |
| C | -3.91818500 | -2.24787800 | -0.93392000 |
| C | -2.62850500 | -2.64634400 | -1.26059700 |
| H | -5.06016000 | -0.70656600 | 0.07732300  |
| H | -4.77122500 | -2.84836600 | -1.22629800 |
| H | -2.43651300 | -3.55936800 | -1.80785800 |
| H | -0.78530500 | 1.86500500  | 0.49878200  |
| C | 1.40819300  | 0.14836200  | -0.39561400 |
| C | 0.91734500  | 0.94629400  | 0.80639100  |
| H | 0.25198600  | 0.31015900  | 1.39676100  |
| O | 0.18758200  | 2.01526900  | 0.26655300  |
| H | 2.14602400  | 0.70076500  | -0.97043300 |
| H | 0.56363100  | -0.14188400 | -1.00896400 |
| C | 2.04926600  | 1.47825100  | 1.67065800  |
| H | 1.62786300  | 2.08506700  | 2.47097500  |
| H | 2.63866200  | 0.67278100  | 2.10929000  |
| H | 2.70584500  | 2.10937100  | 1.06827200  |
| I | 2.37852700  | -1.70976000 | 0.13738100  |
| C | -1.57781900 | -1.83638600 | -0.86034900 |
| H | -0.55411100 | -2.12173400 | -1.08750700 |
| N | -1.73609600 | -0.69862500 | -0.18747700 |
| C | -3.19023400 | 0.98419700  | 0.93583700  |
| O | -2.18619200 | 1.70916100  | 1.12553500  |
| O | -4.34997300 | 1.16986800  | 1.31579200  |
| C | 1.09990900  | 3.85236800  | -1.26417800 |
| O | 0.09073500  | 4.40877000  | -1.30222600 |
| O | 2.15577600  | 3.37630800  | -1.29615400 |

## TS2

-1 1

|   |             |             |             |
|---|-------------|-------------|-------------|
| C | -2.73128400 | -0.79745600 | 0.28438000  |
| C | -3.71373400 | -1.54344200 | -0.36553400 |
| C | -3.33024400 | -2.62084300 | -1.14063400 |
| C | -1.98084700 | -2.93897200 | -1.22083000 |
| H | -4.74679500 | -1.25753900 | -0.23373800 |
| H | -4.06820400 | -3.21029400 | -1.67019600 |
| H | -1.63085600 | -3.77837900 | -1.80593300 |
| H | -1.40056100 | 1.50422200  | 0.65369700  |
| C | 1.41674000  | 0.42772400  | -0.54661500 |
| C | 0.73614900  | 1.19430900  | 0.58390700  |
| H | 0.38749600  | 0.46414000  | 1.32034200  |
| O | -0.40628800 | 1.80488800  | 0.04488700  |
| H | 1.97870300  | 1.07314300  | -1.21134900 |
| H | 0.68367000  | -0.15315700 | -1.09436300 |
| C | 1.65467900  | 2.20240600  | 1.26029800  |
| H | 1.09634300  | 2.72499300  | 2.03642100  |
| H | 2.50956800  | 1.70453800  | 1.72001500  |
| H | 2.01160900  | 2.93152100  | 0.53407000  |
| I | 2.84048600  | -1.02756800 | 0.17941800  |
| C | -1.07970800 | -2.14863100 | -0.52513100 |
| H | -0.01688600 | -2.37179600 | -0.55009700 |
| N | -1.43787100 | -1.09243800 | 0.20134900  |
| C | -3.17380700 | 0.36916800  | 1.16783900  |
| O | -2.33888400 | 1.31611600  | 1.36520700  |
| O | -4.29829700 | 0.30000800  | 1.63830000  |
| C | -0.35549900 | 3.04356800  | -1.28841600 |
| O | -1.48631400 | 3.34464400  | -1.43314200 |
| O | 0.78735600  | 3.15306600  | -1.59938400 |

## Int2

-1 1

|   |             |             |             |
|---|-------------|-------------|-------------|
| C | 2.37639100  | -1.04355900 | -0.27892900 |
| C | 2.60222100  | -1.24399700 | 1.07797300  |
| C | 1.69209600  | -2.00993800 | 1.78243000  |
| C | 0.61321900  | -2.56499500 | 1.10563000  |
| H | 3.44718500  | -0.76797800 | 1.55199200  |
| H | 1.81495300  | -2.16558500 | 2.84620500  |
| H | -0.12513300 | -3.16766100 | 1.61660100  |
| H | 2.09714900  | 1.12890700  | -1.22157000 |
| C | -1.22709900 | 0.61595400  | 0.57778700  |
| C | -0.52019100 | 1.40621200  | -0.52379700 |
| H | -0.53973100 | 0.80472500  | -1.43581000 |

|   |             |             |             |
|---|-------------|-------------|-------------|
| O | 0.85793800  | 1.53929300  | -0.23555800 |
| H | -1.61993400 | 1.23771500  | 1.36957300  |
| H | -0.58504500 | -0.15891300 | 0.98261400  |
| C | -1.18013200 | 2.75165400  | -0.77952800 |
| H | -0.66950500 | 3.26310200  | -1.59475900 |
| H | -2.22789000 | 2.61542600  | -1.05315300 |
| H | -1.11298500 | 3.35930600  | 0.12115200  |
| I | -2.94350800 | -0.45036100 | -0.20638800 |
| C | 0.48046400  | -2.30333400 | -0.24909200 |
| H | -0.36040800 | -2.70081300 | -0.80599200 |
| N | 1.33324100  | -1.54469000 | -0.93440600 |
| C | 3.37399000  | -0.26569800 | -1.11022600 |
| O | 2.92038400  | 0.82331600  | -1.69221100 |
| O | 4.49653600  | -0.67656900 | -1.25457500 |
| C | 1.30222700  | 1.98127800  | 1.10012600  |
| O | 2.51070800  | 1.84914600  | 1.21162000  |
| O | 0.39887100  | 2.37634500  | 1.83176300  |

### TS3

-1 1

|   |             |             |             |
|---|-------------|-------------|-------------|
| C | 2.49843700  | -1.01920800 | -0.31041500 |
| C | 2.63066200  | -1.50241000 | 0.98351600  |
| C | 1.58089600  | -2.23161400 | 1.51599400  |
| C | 0.46558800  | -2.47479800 | 0.72767500  |
| H | 3.52195400  | -1.26943300 | 1.54692800  |
| H | 1.62636100  | -2.59503400 | 2.53414100  |
| H | -0.38769000 | -3.02300500 | 1.10270700  |
| H | 2.34296700  | 1.10944100  | -1.34487100 |
| C | -1.11086800 | 0.79772300  | 0.81172900  |
| C | -0.49417800 | 1.43418700  | -0.42482400 |
| H | -0.60912700 | 0.76128700  | -1.27173000 |
| O | 0.91181400  | 1.56772900  | -0.25292900 |
| H | -1.78309900 | 1.35227900  | 1.43801800  |
| H | -0.70980600 | -0.12507800 | 1.19108500  |
| C | -1.12142300 | 2.78441900  | -0.71837400 |
| H | -0.65035000 | 3.23056300  | -1.59280700 |
| H | -2.18857800 | 2.66698200  | -0.90652500 |
| H | -0.97483300 | 3.44398400  | 0.13761400  |
| I | -3.08098200 | -0.41675100 | -0.20494400 |
| C | 0.44201300  | -1.96333900 | -0.56319000 |
| H | -0.42279300 | -2.11959800 | -1.19703400 |
| N | 1.43002300  | -1.23504100 | -1.07368400 |
| C | 3.61909500  | -0.21483800 | -0.92478600 |
| O | 3.24811200  | 0.85320100  | -1.61294200 |
| O | 4.76551700  | -0.56182800 | -0.82845800 |

|   |            |            |            |
|---|------------|------------|------------|
| C | 1.32712100 | 1.72995100 | 1.08681100 |
| O | 2.52525900 | 1.81688500 | 1.25552600 |
| O | 0.36090000 | 1.73154900 | 1.89323900 |

## PC

-1 1

|   |             |             |             |
|---|-------------|-------------|-------------|
| C | 2.30054400  | -1.47644900 | -0.18482400 |
| C | 2.10954300  | -2.26788200 | 0.93360500  |
| C | 0.83523200  | -2.77097300 | 1.16266600  |
| C | -0.17739400 | -2.47005200 | 0.26859800  |
| H | 2.94460600  | -2.46120200 | 1.59104500  |
| H | 0.63438500  | -3.37760500 | 2.03577700  |
| H | -1.19964800 | -2.78779600 | 0.41716500  |
| H | 2.76006200  | 0.08676000  | -1.78894300 |
| C | -0.17676700 | 1.25997100  | 1.03260400  |
| C | -0.17515900 | 1.72550400  | -0.42075000 |
| H | -0.42173200 | 0.92076400  | -1.10448700 |
| O | 1.21684400  | 2.06489300  | -0.61720200 |
| H | -1.05783500 | 1.58010700  | 1.57899300  |
| H | -0.06222100 | 0.18178700  | 1.13187900  |
| C | -1.04164900 | 2.93832800  | -0.66813600 |
| H | -0.87601000 | 3.32551600  | -1.67261100 |
| H | -2.08494300 | 2.64058300  | -0.56237900 |
| H | -0.81108100 | 3.72405800  | 0.05461000  |
| I | -3.23493200 | -0.32980300 | -0.06296100 |
| C | 0.12092700  | -1.67391900 | -0.83374000 |
| H | -0.66635900 | -1.40578500 | -1.52702400 |
| N | 1.33337600  | -1.17958200 | -1.05443900 |
| C | 3.66350200  | -0.91108500 | -0.49130800 |
| O | 3.67854600  | -0.03533600 | -1.49033300 |
| O | 4.65333800  | -1.23871600 | 0.10157900  |
| C | 1.80172800  | 2.28026100  | 0.57408000  |
| O | 2.89048300  | 2.73664500  | 0.72320300  |
| O | 0.98522900  | 1.91091500  | 1.57365900  |

## Pyridine-3-carboxylic acid (3b)

### RC

-1 1

|   |             |             |             |
|---|-------------|-------------|-------------|
| C | -3.90809100 | -0.82916300 | -0.04896000 |
|---|-------------|-------------|-------------|



|   |             |             |             |
|---|-------------|-------------|-------------|
| C | -4.36884000 | -1.91923800 | 0.67498400  |
| C | -5.72580800 | -2.18733900 | 0.67637500  |
| H | -3.65561200 | -2.52686300 | 1.21592400  |
| H | -6.13351300 | -3.02482200 | 1.22493500  |
| H | -1.12108100 | 0.69674600  | -0.72079900 |
| C | 1.31559000  | 0.04958900  | -0.77239400 |
| C | 1.09626200  | 0.64413200  | 0.53637900  |
| H | 0.47520400  | 0.08275900  | 1.22503000  |
| O | 0.33925600  | 1.11004300  | -0.61179400 |
| H | 2.19969100  | 0.32854400  | -1.32717500 |
| H | 0.88284700  | -0.91962000 | -0.98345600 |
| C | 2.06259400  | 1.62385800  | 1.11703200  |
| H | 1.54933200  | 2.34035700  | 1.76033600  |
| H | 2.81411500  | 1.07960500  | 1.68881400  |
| H | 2.58824800  | 2.14782800  | 0.31990800  |
| I | 4.77712800  | -0.81530000 | -0.10150300 |
| C | -2.44181800 | -0.52869600 | -0.05733700 |
| O | -2.12791200 | 0.52906000  | -0.77700500 |
| O | -1.64703400 | -1.20955800 | 0.54445200  |
| C | -1.35752500 | 3.15799900  | 0.28191900  |
| O | -1.26762500 | 2.67945400  | 1.33002500  |
| O | -1.46645600 | 3.66796100  | -0.74781900 |
| C | -4.83113200 | -0.05360100 | -0.74317000 |
| H | -4.49076800 | 0.79995000  | -1.31552100 |
| C | -6.56416000 | -1.35052800 | -0.04895100 |
| H | -7.63314600 | -1.53299800 | -0.06845000 |
| N | -6.13819800 | -0.30262000 | -0.74828500 |

## TS1

-1 1

|   |             |             |             |
|---|-------------|-------------|-------------|
| C | -3.30818500 | -0.92722200 | -0.08349100 |
| C | -3.54273200 | -2.22224800 | 0.35267400  |
| C | -4.85188700 | -2.64735300 | 0.50453800  |
| H | -2.69388200 | -2.86028000 | 0.56094900  |
| H | -5.08385600 | -3.64798500 | 0.84296600  |
| H | -0.62674600 | 1.13077100  | -0.74928600 |
| C | 1.73979000  | 0.35648600  | -0.86123500 |
| C | 1.30297000  | 1.17648200  | 0.25207600  |
| H | 0.75185700  | 0.63050100  | 1.01620400  |
| O | 0.46251200  | 1.59829800  | -0.82533800 |
| H | 2.41078400  | 0.77765300  | -1.58767200 |
| H | 1.21581300  | -0.56431400 | -1.05577000 |
| C | 2.20793200  | 2.24778300  | 0.78525900  |
| H | 1.63553100  | 2.97043400  | 1.36667400  |

|   |             |             |             |
|---|-------------|-------------|-------------|
| H | 2.97108800  | 1.79177800  | 1.41483400  |
| H | 2.70068700  | 2.76099600  | -0.04103700 |
| I | 3.95746800  | -1.06407700 | 0.02559000  |
| C | -1.88944700 | -0.44042900 | -0.25535100 |
| O | -1.78657700 | 0.78510400  | -0.63892300 |
| O | -0.96259400 | -1.20161100 | -0.03231700 |
| C | -1.45693000 | 3.37156200  | 0.32390300  |
| O | -1.11281000 | 2.98920900  | 1.35935400  |
| O | -1.81744800 | 3.81094000  | -0.68078200 |
| C | -4.40459600 | -0.11402000 | -0.35107200 |
| H | -4.23850900 | 0.89891700  | -0.69609700 |
| C | -5.87392000 | -1.75487900 | 0.21087400  |
| H | -6.91049100 | -2.05677200 | 0.31955900  |
| N | -5.66867300 | -0.50972700 | -0.21036800 |

## Int1

-1 1

|   |             |             |             |
|---|-------------|-------------|-------------|
| C | -3.09799500 | -0.79082300 | -0.18714900 |
| C | -3.26134500 | -2.13704100 | 0.09872700  |
| C | -4.53146600 | -2.61470500 | 0.38342500  |
| H | -2.38546600 | -2.77274100 | 0.09005400  |
| H | -4.70429500 | -3.65785900 | 0.61375800  |
| H | -0.16611400 | 1.56712200  | -1.01816400 |
| C | 2.11161300  | 0.10704300  | -0.96217400 |
| C | 1.55357800  | 1.25892500  | -0.13495200 |
| H | 0.95916800  | 0.83667200  | 0.68231000  |
| O | 0.73298900  | 2.00187100  | -1.00349800 |
| H | 2.73675300  | 0.46958400  | -1.77343000 |
| H | 1.29693000  | -0.51828900 | -1.31171900 |
| C | 2.61716300  | 2.19100800  | 0.41368300  |
| H | 2.13392800  | 3.00855500  | 0.94760600  |
| H | 3.29600100  | 1.67658200  | 1.09243600  |
| H | 3.19401200  | 2.61207900  | -0.41295900 |
| I | 3.36623800  | -1.23973800 | 0.17241300  |
| C | -1.71617000 | -0.22606700 | -0.50499300 |
| O | -1.67552700 | 1.01574800  | -0.71351400 |
| O | -0.77771900 | -1.03082100 | -0.52991600 |
| C | -1.13881600 | 3.33649400  | 0.58188000  |
| O | -0.70947600 | 2.81349100  | 1.52017700  |
| O | -1.58572500 | 3.93858000  | -0.29612400 |
| C | -4.23043900 | 0.01768900  | -0.17501900 |
| H | -4.11767100 | 1.07145900  | -0.39879700 |
| C | -5.59208300 | -1.72014600 | 0.36786200  |
| H | -6.59916600 | -2.06194300 | 0.58589700  |

|   |             |             |            |
|---|-------------|-------------|------------|
| N | -5.45932200 | -0.42433200 | 0.09433500 |
|---|-------------|-------------|------------|

## TS2

-1 1

|   |             |             |             |
|---|-------------|-------------|-------------|
| C | 3.60995800  | -0.41420200 | -0.07716800 |
| C | 4.04326900  | -1.63539900 | -0.56895900 |
| C | 5.39924200  | -1.91858800 | -0.55527900 |
| H | 3.30619700  | -2.33044000 | -0.94913700 |
| H | 5.78331400  | -2.85828300 | -0.92876800 |
| H | 0.69259700  | 1.38513500  | 0.37257500  |
| C | -1.80496800 | 0.02781500  | -0.44701600 |
| C | -1.42749500 | 0.83816600  | 0.78795000  |
| H | -2.30318400 | 1.40338800  | 1.11623800  |
| O | -0.44687200 | 1.76139400  | 0.38435100  |
| H | -0.98802400 | -0.61539300 | -0.76024700 |
| H | -2.12896100 | 0.68826600  | -1.24326400 |
| C | -0.89363800 | -0.01756800 | 1.92655200  |
| H | -0.52740700 | 0.62964100  | 2.72285800  |
| H | -1.67613500 | -0.66212000 | 2.32590400  |
| H | -0.07189300 | -0.64074100 | 1.57184100  |
| I | -3.49801900 | -1.26875900 | -0.10331000 |
| C | 2.13357300  | -0.08002900 | -0.07769100 |
| O | 1.85421100  | 1.06453400  | 0.42238100  |
| O | 1.34421200  | -0.90021600 | -0.52966700 |
| C | -0.96422800 | 3.22113700  | -0.47031500 |
| O | -2.15567400 | 3.19457100  | -0.49533100 |
| O | 0.03747500  | 3.78611100  | -0.75544500 |
| C | 6.26726600  | -0.96223200 | -0.04715700 |
| H | 7.33536100  | -1.15265200 | -0.02114400 |
| N | 5.87138500  | 0.21574600  | 0.42800300  |
| H | 4.24153800  | 1.43403900  | 0.79109500  |
| C | 4.56453600  | 0.47457000  | 0.40761000  |

## Int2

-1 1

|   |             |             |             |
|---|-------------|-------------|-------------|
| C | 3.67533000  | -0.40765500 | -0.07596900 |
| C | 4.07032500  | -1.65916700 | -0.52288300 |
| C | 5.41699800  | -1.97832700 | -0.50200300 |
| H | 3.31436400  | -2.34845300 | -0.87509200 |
| H | 5.77335000  | -2.94147200 | -0.84045900 |
| H | 0.98100000  | 1.39499200  | 0.33755700  |
| C | -1.88655600 | 0.06269600  | -0.45838200 |
| C | -1.50115200 | 0.87731700  | 0.76889900  |

|   |             |             |             |
|---|-------------|-------------|-------------|
| H | -2.36204100 | 1.46612100  | 1.08808200  |
| O | -0.47798700 | 1.76266100  | 0.36196600  |
| H | -1.07501100 | -0.58738700 | -0.77114400 |
| H | -2.21080800 | 0.72453600  | -1.25290700 |
| C | -0.96027700 | 0.03316500  | 1.90896200  |
| H | -0.59926600 | 0.68559100  | 2.70337100  |
| H | -1.73564300 | -0.61759400 | 2.31149200  |
| H | -0.13345100 | -0.58585200 | 1.55701500  |
| I | -3.57820900 | -1.22775400 | -0.09633700 |
| C | 2.21607500  | -0.04731300 | -0.09085600 |
| O | 1.97865500  | 1.13936900  | 0.39125900  |
| O | 1.38910300  | -0.82782700 | -0.51255800 |
| C | -0.86897500 | 2.99911100  | -0.41374900 |
| O | -2.07653800 | 3.11270000  | -0.56109200 |
| O | 0.12834100  | 3.61841500  | -0.72580000 |
| C | 6.31225500  | -1.02655200 | -0.03279300 |
| H | 7.37456100  | -1.24496800 | -0.00211000 |
| N | 5.95116100  | 0.17898000  | 0.39758200  |
| H | 4.36318200  | 1.45885700  | 0.71818300  |
| C | 4.65333000  | 0.47525900  | 0.37187300  |

### TS3

-1 1

|   |             |             |             |
|---|-------------|-------------|-------------|
| C | 3.44248300  | -0.36914400 | -0.05829700 |
| C | 3.68814100  | -1.42348300 | -0.92512500 |
| C | 4.94399400  | -2.00405600 | -0.92279700 |
| H | 2.89184600  | -1.76052900 | -1.57545700 |
| H | 5.18390500  | -2.82880600 | -1.57928000 |
| H | 1.05604500  | 1.62787300  | 0.77658700  |
| C | -2.14371500 | 0.84056500  | -0.49070200 |
| C | -1.61571200 | 1.31620400  | 0.85699900  |
| H | -2.39761800 | 1.92183800  | 1.32340100  |
| O | -0.48653900 | 2.16210900  | 0.62297500  |
| H | -1.45832200 | 0.35464200  | -1.16488500 |
| H | -3.10589700 | 1.13998700  | -0.84764300 |
| C | -1.11995300 | 0.26145200  | 1.83070000  |
| H | -0.55656200 | 0.76389800  | 2.61799400  |
| H | -1.94655200 | -0.28791700 | 2.26779100  |
| H | -0.46961700 | -0.44545300 | 1.31571300  |
| I | -3.32755100 | -1.42186700 | -0.03525500 |
| C | 2.08506600  | 0.26482400  | -0.05236800 |
| O | 1.96749600  | 1.22232900  | 0.84512200  |
| O | 1.21111600  | -0.09731900 | -0.80080200 |
| C | -0.56364800 | 2.93117400  | -0.56937800 |

|   |             |             |             |
|---|-------------|-------------|-------------|
| O | -1.58160700 | 2.64292400  | -1.24499400 |
| O | 0.34757100  | 3.70874900  | -0.74121800 |
| C | 5.90109500  | -1.50199100 | -0.05097600 |
| H | 6.89529700  | -1.93519700 | -0.02419400 |
| N | 5.68210700  | -0.49120900 | 0.78533800  |
| H | 4.29838000  | 0.88377200  | 1.45536100  |
| C | 4.47062200  | 0.05994600  | 0.77479400  |

**PC**

-1 1

|   |             |             |             |
|---|-------------|-------------|-------------|
| C | -4.07392900 | -0.38293400 | 0.00907500  |
| C | -4.52756900 | -0.82343900 | 1.24408600  |
| C | -5.82180100 | -1.30072900 | 1.34044000  |
| H | -3.85948200 | -0.78107800 | 2.09390500  |
| H | -6.22201700 | -1.65552700 | 2.27967600  |
| H | -1.44732000 | 0.86656900  | -1.32703900 |
| C | 1.36588600  | 0.80034900  | 0.95083600  |
| C | 1.24410600  | 0.56768700  | -0.55335500 |
| H | 2.14860200  | 0.89234600  | -1.06507600 |
| O | 0.17584300  | 1.49012900  | -0.91284800 |
| H | 0.83902300  | 0.03853700  | 1.52459700  |
| H | 2.40016600  | 0.87908300  | 1.26870000  |
| C | 0.87552300  | -0.83554500 | -0.95529600 |
| H | 0.70916000  | -0.89398300 | -2.03105500 |
| H | 1.71151200  | -1.48634400 | -0.69810100 |
| H | -0.02324900 | -1.15775600 | -0.42774300 |
| I | 4.61832200  | -0.77504400 | 0.03770700  |
| C | -2.67809800 | 0.13332400  | -0.10454700 |
| O | -2.36198900 | 0.50811000  | -1.33687000 |
| O | -1.92792000 | 0.18935700  | 0.83691500  |
| C | -0.06309600 | 2.34968600  | 0.10709100  |
| O | 0.69412200  | 2.05668100  | 1.15680200  |
| O | -0.84786100 | 3.24285900  | 0.03618100  |
| C | -6.60639200 | -1.31548300 | 0.19425800  |
| H | -7.62558400 | -1.68387400 | 0.23585600  |
| N | -6.18605400 | -0.89555900 | -0.99553800 |
| H | -4.60560100 | -0.09702100 | -2.04972700 |
| C | -4.93987300 | -0.43821300 | -1.07844100 |

## Pyridine-4-carboxylic acid (3c)

### RC

-1 1

|   |             |             |             |
|---|-------------|-------------|-------------|
| C | -3.93234400 | -0.80759200 | -0.04236100 |
| C | -4.44797900 | -1.83609000 | 0.73170100  |
| C | -5.81159000 | -2.08028200 | 0.68150200  |
| H | -3.78535500 | -2.42234600 | 1.35254800  |
| H | -6.24628200 | -2.87688600 | 1.27435700  |
| H | -1.09021800 | 0.63798400  | -0.69088100 |
| C | 1.39051600  | 0.10003700  | -0.79674800 |
| C | 1.14186100  | 0.58619100  | 0.55049500  |
| H | 0.55602100  | -0.05505600 | 1.19889100  |
| O | 0.35442800  | 1.08767700  | -0.56278600 |
| H | 2.25435700  | 0.46843400  | -1.33029100 |
| H | 1.01923300  | -0.87586600 | -1.08052500 |
| C | 2.05545500  | 1.57465200  | 1.19773600  |
| H | 1.50951500  | 2.20894800  | 1.89749100  |
| H | 2.84330700  | 1.03149200  | 1.71974800  |
| H | 2.53841900  | 2.18908100  | 0.43881000  |
| I | 4.78801300  | -0.80713600 | -0.12227000 |
| C | -6.15017700 | -0.39744700 | -0.80904000 |
| H | -6.85632200 | 0.15915900  | -1.41472100 |
| C | -2.45561100 | -0.52974200 | 0.00147500  |
| O | -2.09533300 | 0.46940300  | -0.77611000 |
| O | -1.70508700 | -1.17713200 | 0.68804500  |
| C | -1.34793400 | 3.12292800  | 0.27395600  |
| O | -1.27385400 | 2.64921800  | 1.32528200  |
| O | -1.44442300 | 3.62881700  | -0.75929800 |
| N | -6.65816700 | -1.38047900 | -0.07115700 |
| C | -4.80145100 | -0.06995400 | -0.83214600 |
| H | -4.43049600 | 0.73656300  | -1.44751800 |

### TS1

-1 1

|   |             |             |             |
|---|-------------|-------------|-------------|
| C | -3.31477600 | -0.91829300 | -0.08741900 |
| C | -3.56000400 | -2.20756900 | 0.36081100  |
| C | -4.87503800 | -2.62176100 | 0.50783700  |
| H | -2.72594400 | -2.85798000 | 0.58457900  |
| H | -5.09651400 | -3.62408700 | 0.85787800  |
| H | -0.59704700 | 1.13570200  | -0.76282400 |
| C | 1.73775200  | 0.35812100  | -0.87030300 |
| C | 1.30759900  | 1.17553200  | 0.24632300  |

|   |             |             |             |
|---|-------------|-------------|-------------|
| H | 0.75075300  | 0.63205600  | 1.00734200  |
| O | 0.47019400  | 1.59351900  | -0.84005600 |
| H | 2.41584700  | 0.77339000  | -1.59332200 |
| H | 1.21960000  | -0.56741500 | -1.05889400 |
| C | 2.20987500  | 2.24911000  | 0.77680000  |
| H | 1.63673700  | 2.97212000  | 1.35684400  |
| H | 2.97275100  | 1.79364900  | 1.40699200  |
| H | 2.70351400  | 2.76051600  | -0.04995600 |
| I | 3.97983600  | -1.05239600 | 0.02603500  |
| C | -5.67898400 | -0.61558900 | -0.19047900 |
| H | -6.54753700 | -0.00193900 | -0.40420900 |
| C | -1.88728600 | -0.43696300 | -0.25690500 |
| O | -1.78154700 | 0.78332500  | -0.64753600 |
| O | -0.96645900 | -1.20241900 | -0.02435900 |
| C | -1.49171600 | 3.34936100  | 0.33928900  |
| O | -1.11503300 | 2.96339800  | 1.36176900  |
| O | -1.88288400 | 3.79211400  | -0.65255400 |
| N | -5.92756400 | -1.85008500 | 0.24063400  |
| C | -4.40149600 | -0.10399200 | -0.36978200 |
| H | -4.24022800 | 0.90432900  | -0.72388000 |

## Int1

-1 1

|   |             |             |             |
|---|-------------|-------------|-------------|
| C | -3.10781600 | -0.77826900 | -0.18602500 |
| C | -3.29095300 | -2.12350900 | 0.09993500  |
| C | -4.56965200 | -2.58276000 | 0.37766200  |
| H | -2.43265300 | -2.78114700 | 0.09957800  |
| H | -4.73708600 | -3.63054600 | 0.60571600  |
| H | -0.15537900 | 1.56678500  | -1.01808300 |
| C | 2.11358500  | 0.10090400  | -0.96214000 |
| C | 1.56541500  | 1.25997300  | -0.13842700 |
| H | 0.97430600  | 0.84508200  | 0.68505600  |
| O | 0.74241700  | 2.00238100  | -1.00569000 |
| H | 2.73446500  | 0.45634600  | -1.77976400 |
| H | 1.29459700  | -0.52359400 | -1.30325100 |
| C | 2.63577500  | 2.19088900  | 0.39858400  |
| H | 2.15887100  | 3.01355700  | 0.93033700  |
| H | 3.31627800  | 1.67768800  | 1.07648500  |
| H | 3.20962200  | 2.60467400  | -0.43377900 |
| I | 3.36994900  | -1.24291000 | 0.17275300  |
| C | -5.46478900 | -0.51526900 | 0.10913200  |
| H | -6.35466000 | 0.10602000  | 0.11897700  |
| C | -1.71396900 | -0.22733500 | -0.49880400 |
| O | -1.66546700 | 1.01378000  | -0.70683700 |

|   |             |             |             |
|---|-------------|-------------|-------------|
| O | -0.78485700 | -1.04094200 | -0.51972300 |
| C | -1.12581800 | 3.33865800  | 0.58245000  |
| O | -0.68787500 | 2.82057500  | 1.51929800  |
| O | -1.58270700 | 3.93559100  | -0.29414600 |
| N | -5.65180300 | -1.80491300 | 0.38609600  |
| C | -4.22724500 | 0.04155200  | -0.17944800 |
| H | -4.11230800 | 1.09370500  | -0.40056300 |

## TS2

-1 1

|   |             |             |             |
|---|-------------|-------------|-------------|
| C | 3.61344100  | -0.41334000 | -0.06635900 |
| C | 4.05539700  | -1.64907100 | -0.51483400 |
| C | 5.41662000  | -1.91237300 | -0.50933500 |
| H | 3.33311400  | -2.37671900 | -0.85764400 |
| H | 5.78963900  | -2.87111400 | -0.85352700 |
| H | 0.68828000  | 1.37869700  | 0.37849700  |
| C | -1.80733000 | 0.02743000  | -0.44618200 |
| C | -1.43884800 | 0.84129600  | 0.78897100  |
| H | -2.31482700 | 1.41200300  | 1.10603900  |
| O | -0.44988400 | 1.76005500  | 0.39247100  |
| H | -0.99062500 | -0.62152200 | -0.74814700 |
| H | -2.11961700 | 0.68611700  | -1.24857600 |
| C | -0.91781700 | -0.01068200 | 1.93601200  |
| H | -0.56079800 | 0.63889800  | 2.73455300  |
| H | -1.70480400 | -0.65391200 | 2.32845600  |
| H | -0.09247900 | -0.63533600 | 1.59242300  |
| I | -3.50921900 | -1.25880200 | -0.11256600 |
| C | 5.89992400  | 0.14203100  | 0.32848600  |
| H | 6.66222000  | 0.83983700  | 0.65808200  |
| C | 2.12857900  | -0.09415700 | -0.05748700 |
| O | 1.84888300  | 1.05822900  | 0.42271500  |
| O | 1.34342900  | -0.93003000 | -0.48377200 |
| C | -0.94644900 | 3.21105500  | -0.46431800 |
| O | -2.13846700 | 3.19496200  | -0.50682000 |
| O | 0.06027600  | 3.77449000  | -0.73937900 |
| C | 4.56062600  | 0.50348700  | 0.36476200  |
| H | 4.24356100  | 1.47509000  | 0.71554500  |
| N | 6.33660100  | -1.04160100 | -0.09710300 |



## Int2

-1 1

|   |             |             |             |
|---|-------------|-------------|-------------|
| C | 3.68051300  | -0.40822700 | -0.06469100 |
| C | 4.08588200  | -1.67311500 | -0.46271100 |
| C | 5.44013900  | -1.96873500 | -0.45280300 |
| H | 3.34510000  | -2.39746600 | -0.77091800 |
| H | 5.78786800  | -2.94976400 | -0.75701600 |
| H | 0.96936100  | 1.37980200  | 0.34768300  |
| C | -1.88828500 | 0.06101900  | -0.45767700 |
| C | -1.50972300 | 0.87679800  | 0.77087700  |
| H | -2.36972000 | 1.47241200  | 1.07947600  |
| O | -0.47701800 | 1.75510200  | 0.37186400  |
| H | -1.07835500 | -0.59610200 | -0.76001900 |
| H | -2.19925700 | 0.72254900  | -1.25782000 |
| C | -0.98559900 | 0.03300300  | 1.91893600  |
| H | -0.63100900 | 0.68569900  | 2.71600800  |
| H | -1.76836900 | -0.61335400 | 2.31407000  |
| H | -0.15767900 | -0.59059400 | 1.57783900  |
| I | -3.59211700 | -1.21589900 | -0.10818200 |
| C | 5.97907700  | 0.10897600  | 0.29251800  |
| H | 6.76021500  | 0.80128700  | 0.58626900  |
| C | 2.21083800  | -0.06622200 | -0.06690100 |
| O | 1.97057400  | 1.12654500  | 0.39469200  |
| O | 1.38955500  | -0.86498500 | -0.46196400 |
| C | -0.85236400 | 2.99677300  | -0.40668100 |
| O | -2.05719300 | 3.11771100  | -0.56557900 |
| O | 0.15279900  | 3.60910500  | -0.70675300 |
| C | 4.64937500  | 0.50585600  | 0.32132000  |
| H | 4.36336700  | 1.50063200  | 0.63049500  |
| N | 6.38168700  | -1.10243100 | -0.08337500 |

## TS3

-1 1

|   |             |             |             |
|---|-------------|-------------|-------------|
| C | 3.47848300  | -0.37713300 | -0.04690600 |
| C | 3.74307400  | -1.43540100 | -0.90274000 |
| C | 5.01385900  | -1.98914400 | -0.89541900 |
| H | 2.96180800  | -1.80474100 | -1.55202700 |
| H | 5.25209900  | -2.81845300 | -1.55172700 |
| H | 1.05784700  | 1.58842200  | 0.78200200  |
| C | -2.15012000 | 0.84585800  | -0.49593800 |
| C | -1.61042300 | 1.30410900  | 0.85314100  |
| H | -2.38071900 | 1.91872900  | 1.32683300  |
| O | -0.46842500 | 2.13397100  | 0.62140700  |
| H | -1.47834400 | 0.34208700  | -1.17090300 |

|   |             |             |             |
|---|-------------|-------------|-------------|
| H | -3.10614800 | 1.16619000  | -0.85096100 |
| C | -1.12702100 | 0.23440200  | 1.81675800  |
| H | -0.55171100 | 0.72178100  | 2.60496000  |
| H | -1.96009800 | -0.30471600 | 2.25401300  |
| H | -0.49060400 | -0.47896100 | 1.29318600  |
| I | -3.39187400 | -1.38692300 | -0.03513400 |
| C | 5.73331400  | -0.54290600 | 0.70346800  |
| H | 6.55038000  | -0.20708300 | 1.33218300  |
| C | 2.10380000  | 0.23341800  | -0.04368100 |
| O | 1.97307700  | 1.18844000  | 0.85297500  |
| O | 1.23872500  | -0.14553800 | -0.79232000 |
| C | -0.53059200 | 2.90577100  | -0.57055700 |
| O | -1.54982200 | 2.63190400  | -1.24983800 |
| O | 0.39206600  | 3.67052500  | -0.73776500 |
| C | 4.49598200  | 0.08157500  | 0.77604600  |
| H | 4.32181800  | 0.90671700  | 1.45078000  |
| N | 6.00084600  | -1.56011100 | -0.11099100 |

## PC

-1 1

|   |             |             |             |
|---|-------------|-------------|-------------|
| C | -4.08748500 | -0.37722600 | 0.00243600  |
| C | -4.56061200 | -0.79769100 | 1.23604900  |
| C | -5.86452400 | -1.26087400 | 1.31813700  |
| H | -3.91395000 | -0.75691400 | 2.10103200  |
| H | -6.26601000 | -1.59764500 | 2.26685100  |
| H | -1.42969500 | 0.82984800  | -1.32134000 |
| C | 1.38019900  | 0.81015500  | 0.95443000  |
| C | 1.25108900  | 0.54257700  | -0.54328900 |
| H | 2.15236000  | 0.85647700  | -1.06713300 |
| O | 0.17941600  | 1.45535800  | -0.91810300 |
| H | 0.85744200  | 0.06118700  | 1.54857700  |
| H | 2.41611000  | 0.89760200  | 1.26474700  |
| C | 0.88167700  | -0.86988200 | -0.91053700 |
| H | 0.71072200  | -0.95375000 | -1.98391000 |
| H | 1.71951100  | -1.51376000 | -0.64227800 |
| H | -0.01436700 | -1.18059900 | -0.37139800 |
| I | 4.63079500  | -0.76589100 | 0.03700100  |
| C | -6.22342200 | -0.91642100 | -0.90082400 |
| H | -6.91282800 | -0.97539400 | -1.73524800 |
| C | -2.67899400 | 0.12578300  | -0.09958600 |
| O | -2.34757900 | 0.47726300  | -1.33354900 |
| O | -1.94241400 | 0.18875700  | 0.85054300  |
| C | -0.05544400 | 2.33828800  | 0.08325300  |
| O | 0.70746200  | 2.07011900  | 1.13509300  |

|   |             |             |             |
|---|-------------|-------------|-------------|
| O | -0.84235800 | 3.22792100  | -0.00463500 |
| C | -4.93541400 | -0.43617900 | -1.09321100 |
| H | -4.59787800 | -0.11403600 | -2.06711800 |
| N | -6.69031000 | -1.32390000 | 0.27574800  |

### III. References

- 1 Gaussian 16, Revision C.01, M. J. Frisch, G. W. Trucks, H. B. Schlegel, G. E. Scuseria, M. A. Robb, J. R. Cheeseman, G. Scalmani, V. Barone, G. A. Petersson, H. Nakatsuji, X. Li, M. Caricato, A. V. Marenich, J. Bloino, B. G. Janesko, R. Gomperts, B. Mennucci, H. P. Hratchian, J. V. Ortiz, A. F. Izmaylov, J. L. Sonnenberg, D. Williams-Young, F. Ding, F. Lipparini, F. Egidi, J. Goings, B. Peng, A. Petrone, T. Henderson, D. Ranasinghe, V. G. Zakrzewski, J. Gao, N. Rega, G. Zheng, W. Liang, M. Hada, M. Ehara, K. Toyota, R. Fukuda, J. Hasegawa, M. Ishida, T. Nakajima, Y. Honda, O. Kitao, H. Nakai, T. Vreven, K. Throssell, J. A. Montgomery, Jr., J. E. Peralta, F. Ogliaro, M. J. Bearpark, J. J. Heyd, E. N. Brothers, K. N. Kudin, V. N. Staroverov, T. A. Keith, R. Kobayashi, J. Normand, K. Raghavachari, A. P. Rendell, J. C. Burant, S. S. Iyengar, J. Tomasi, M. Cossi, J. M. Millam, M. Klene, C. Adamo, R. Cammi, J. W. Ochterski, R. L. Martin, K. Morokuma, O. Farkas, J. B. Foresman, and D. J. Fox, Gaussian, Inc., Wallingford CT, 2016.
- 2 Y. Zhao and D. G. Truhlar, *Theor. Chem. Acc.*, 2008, **120**, 215–241.
- 3 F. Weigend and R. Ahlrichs, *Phys. Chem. Chem. Phys.*, 2005, **7**, 3297–3305.
- 4 L. A. Curtiss, P. C. Redfern, K. Raghavachari, V. Rassolov and J. A. Pople, *J. Chem. Phys.*, 1999, **110**, 4703–4709.
- 5 J. Tomasi, B. Mennucci and R. Cammi, *Chem. Rev.*, 2005, **105**, 2999–3094.
- 6 M. A. Emelyanov, N. V Stoletova, A. A. Lisov, M. G. Medvedev, A. F. Smol'yakov, V. I.

Maleev and V. A. Larionov, *Inorg. Chem. Front.*, 2021, **8**, 3871–3884.

7 J. Contreras-García, E. R. Johnson, S. Keinan, R. Chaudret, J.-P. Piquemal, D. N. Beratan and W. Yang, *J. Chem. Theory Comput.*, 2011, **7**, 625–632.

8 W. Humphrey, A. Dalke and K. Schulten, *J. Mol. Graph.*, 1996, **14**, 33–38.

#### IV. $^1\text{H}$ NMR, $^{13}\text{C}$ NMR selected spectra

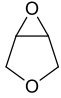

**1b**

CDCl<sub>3</sub>, 600 MHz

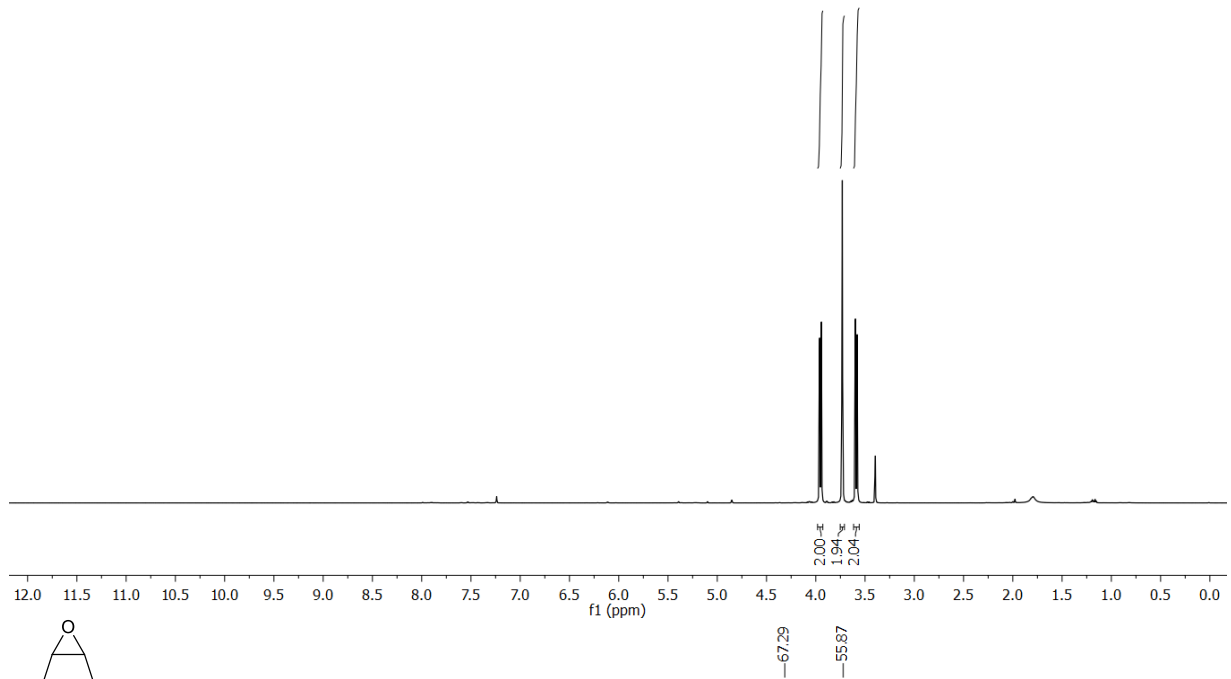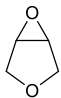

**1b**

CDCl<sub>3</sub>, 151 MHz

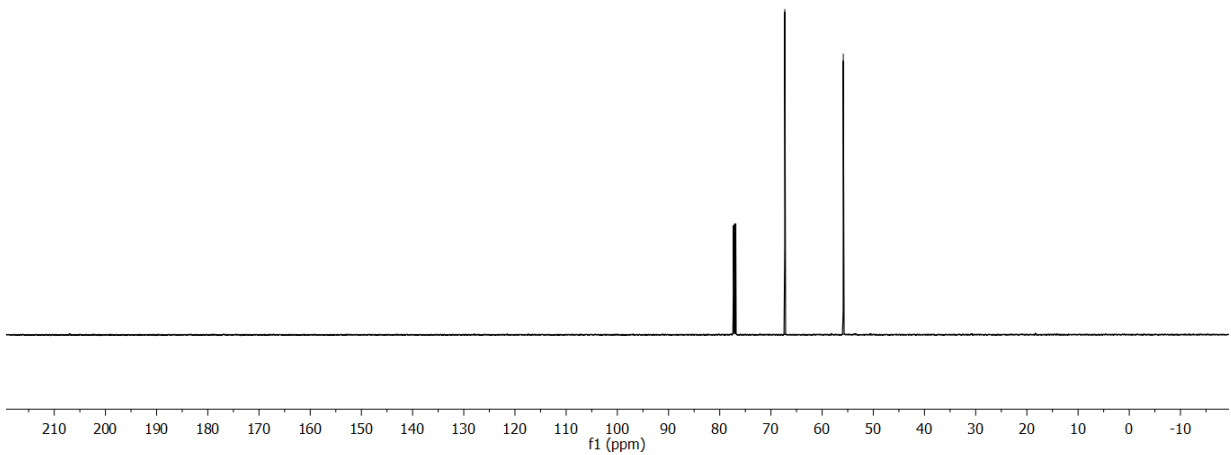

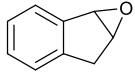

**1e**  
CDCl<sub>3</sub>, 600 MHz

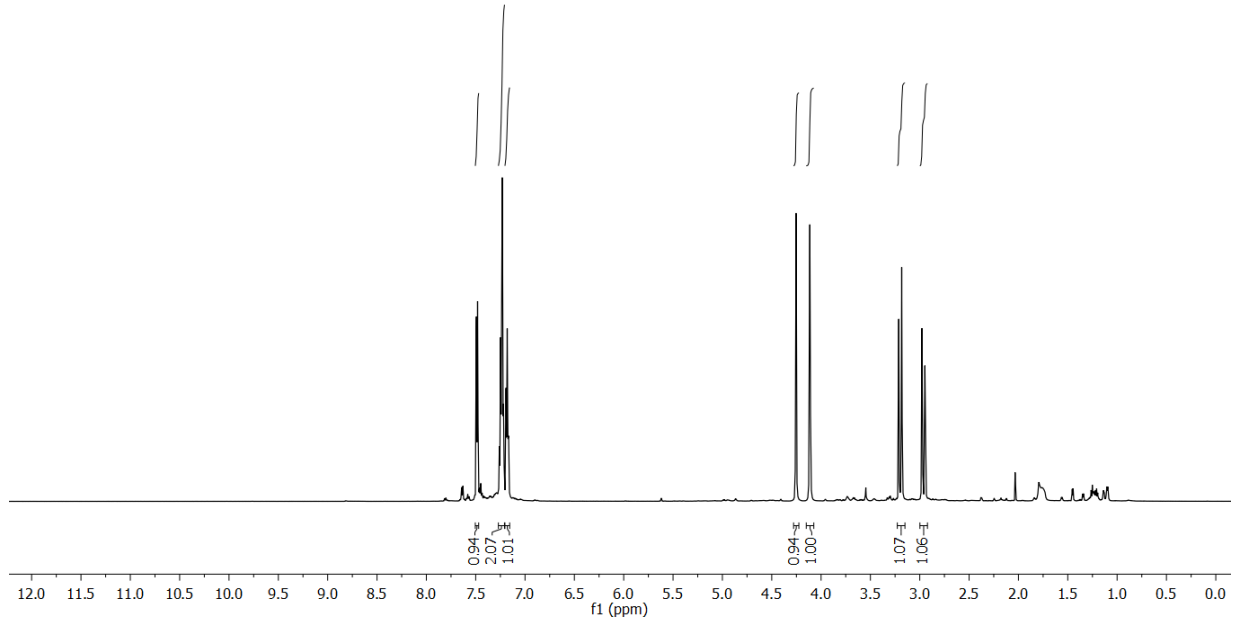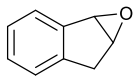

**1e**  
CDCl<sub>3</sub>, 151 MHz

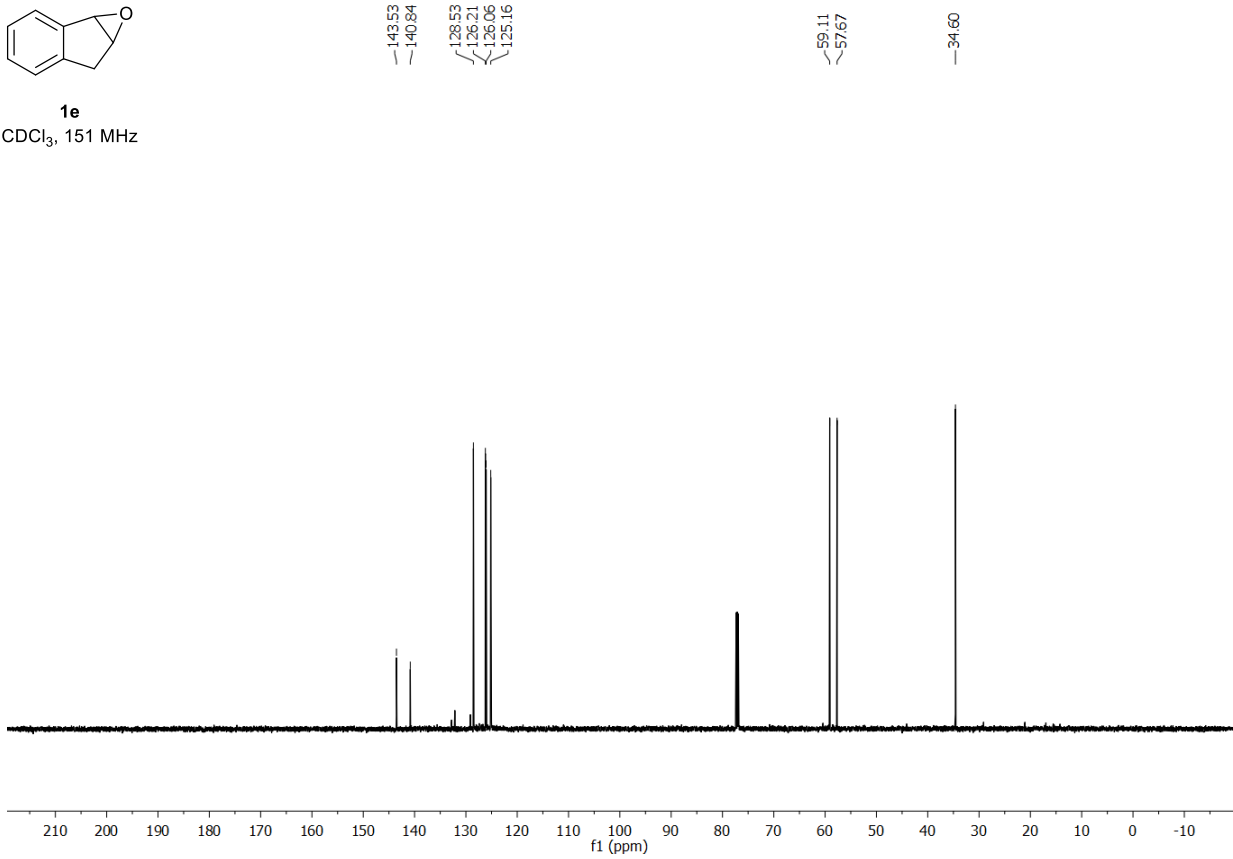

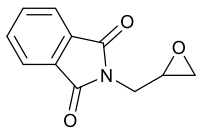

**1o**  
CDCl<sub>3</sub>, 600 MHz

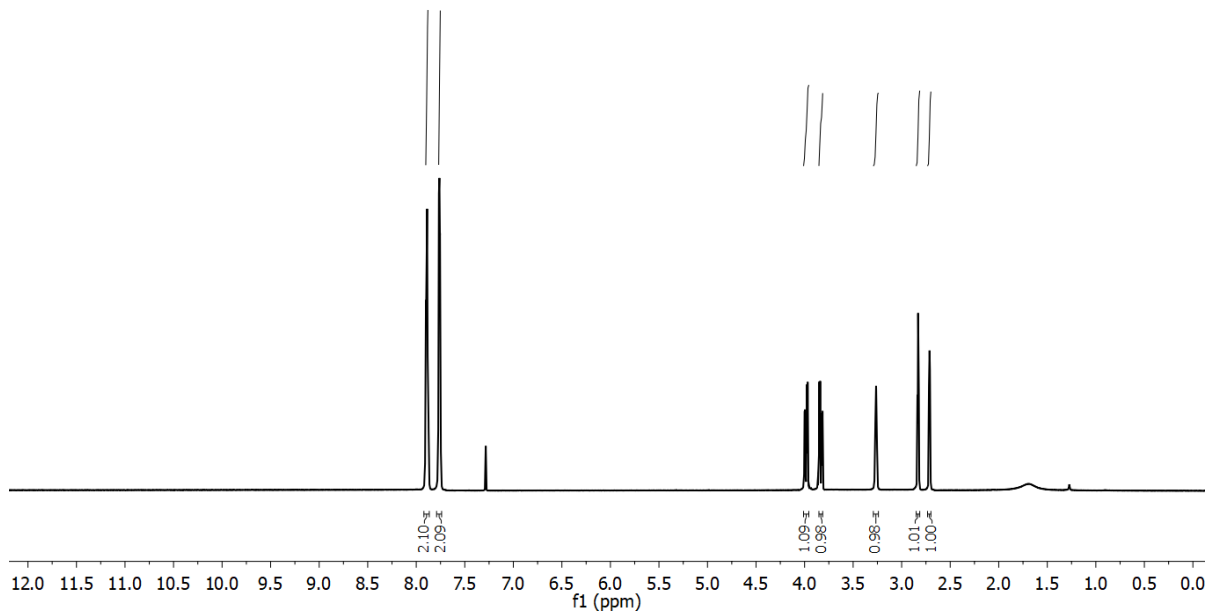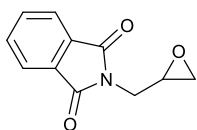

**1o**  
CDCl<sub>3</sub>, 151 MHz

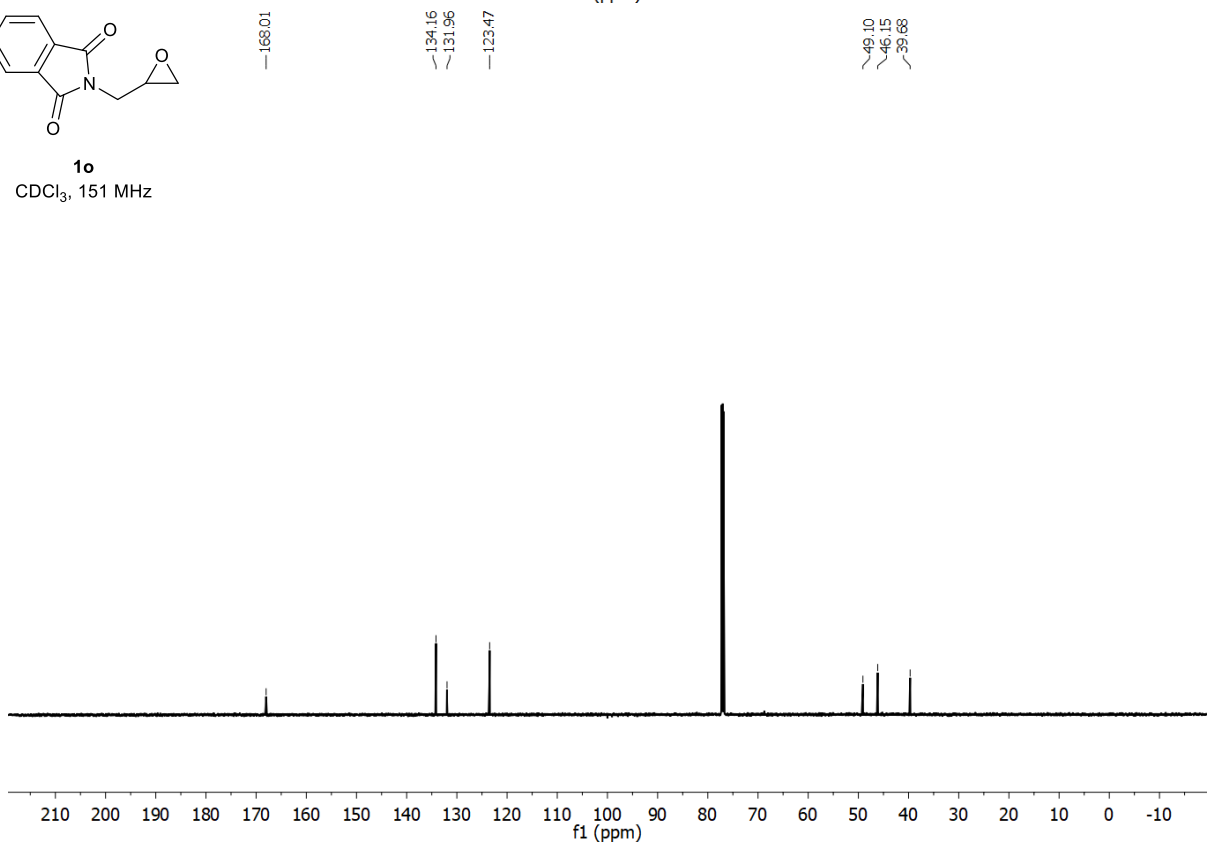

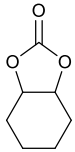

**2a**  
CDCl<sub>3</sub>, 600 MHz

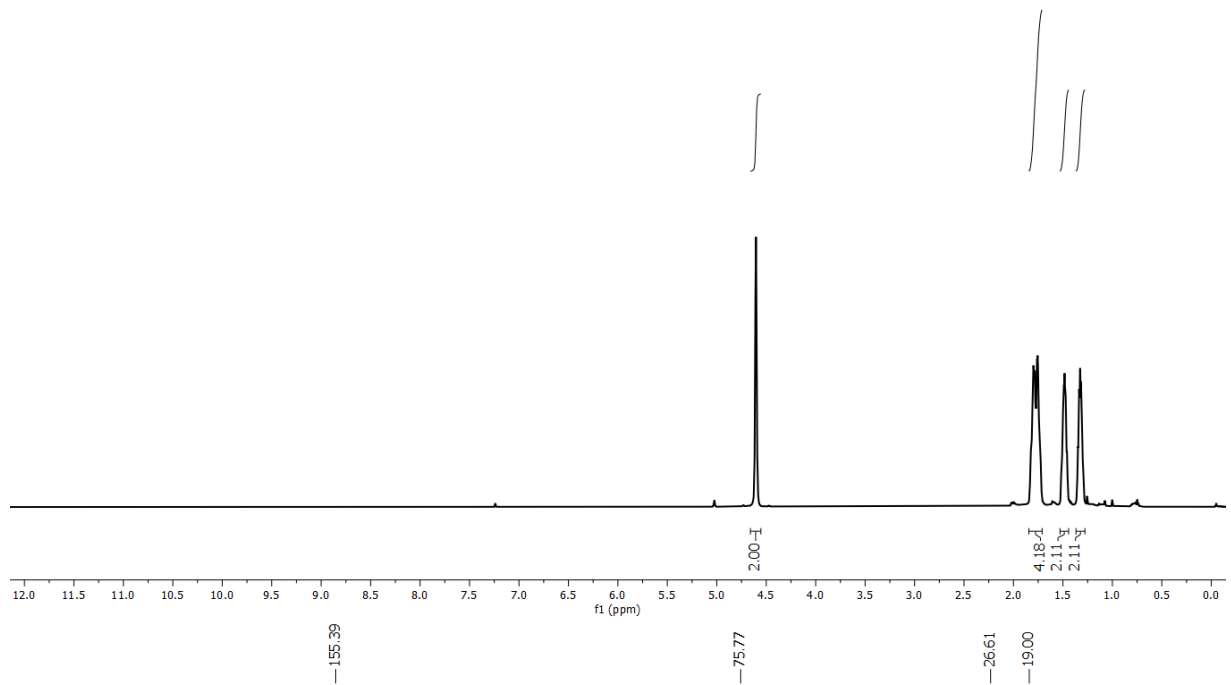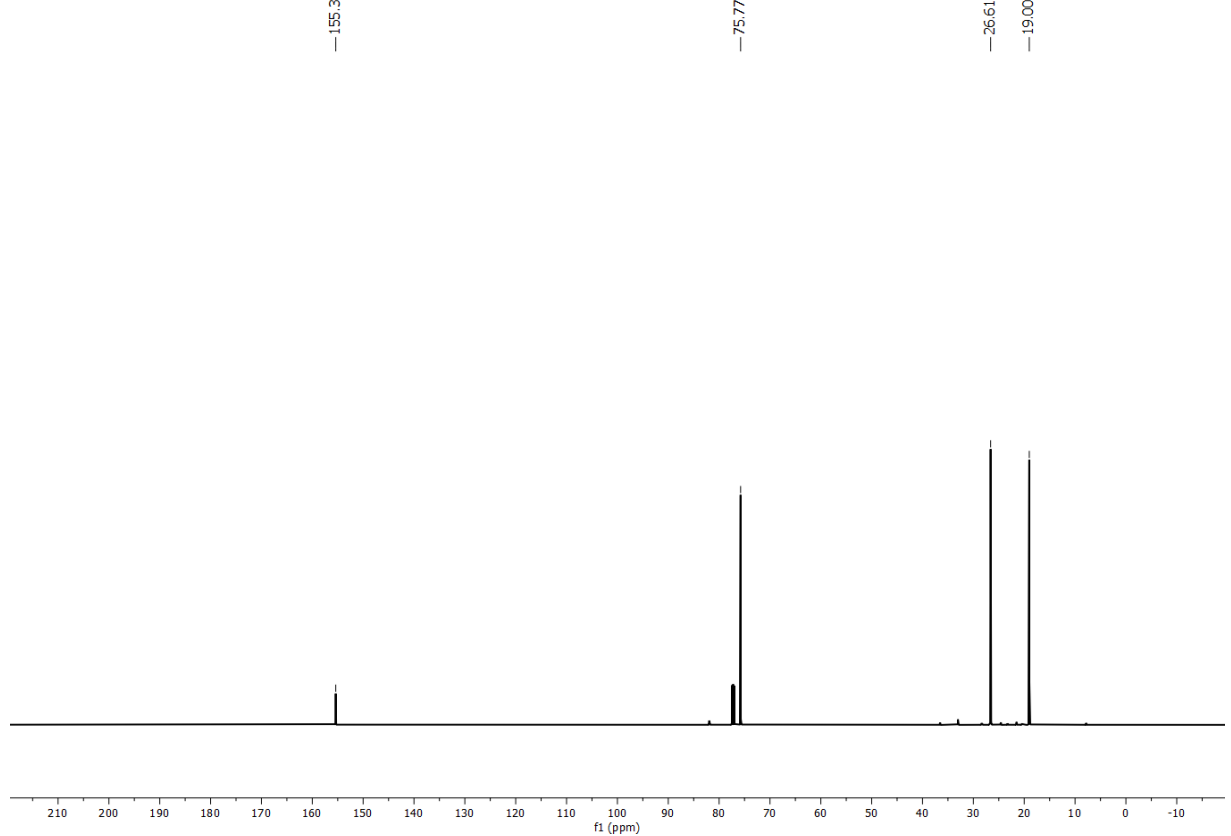



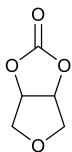

**2b**  
CDCl<sub>3</sub>, 600 MHz

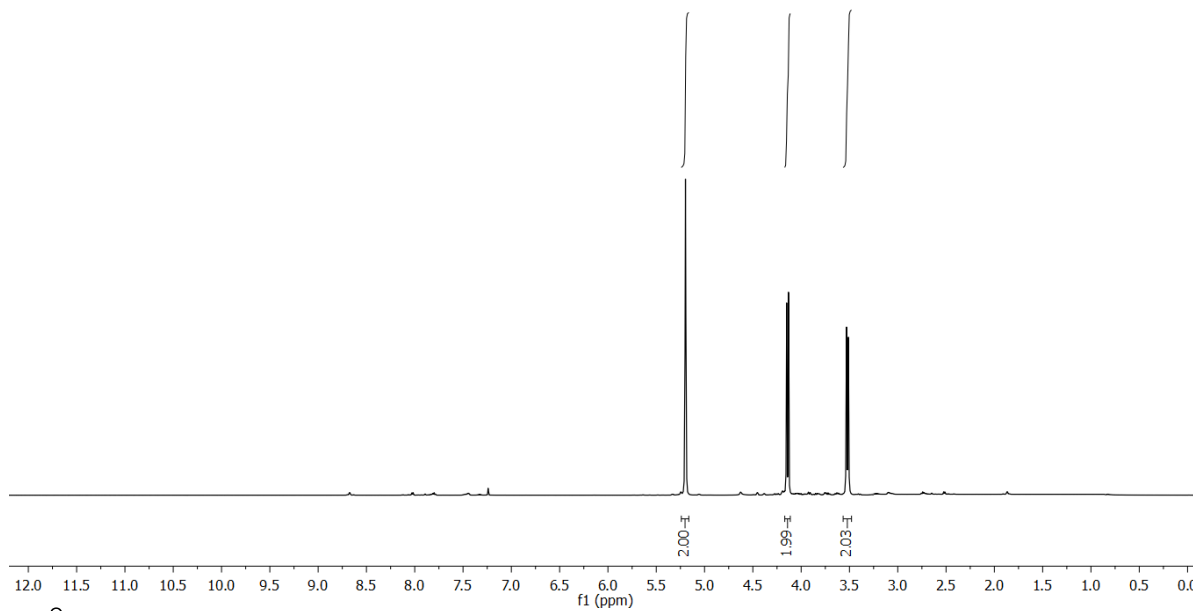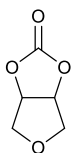

**2b**  
CDCl<sub>3</sub>, 151 MHz

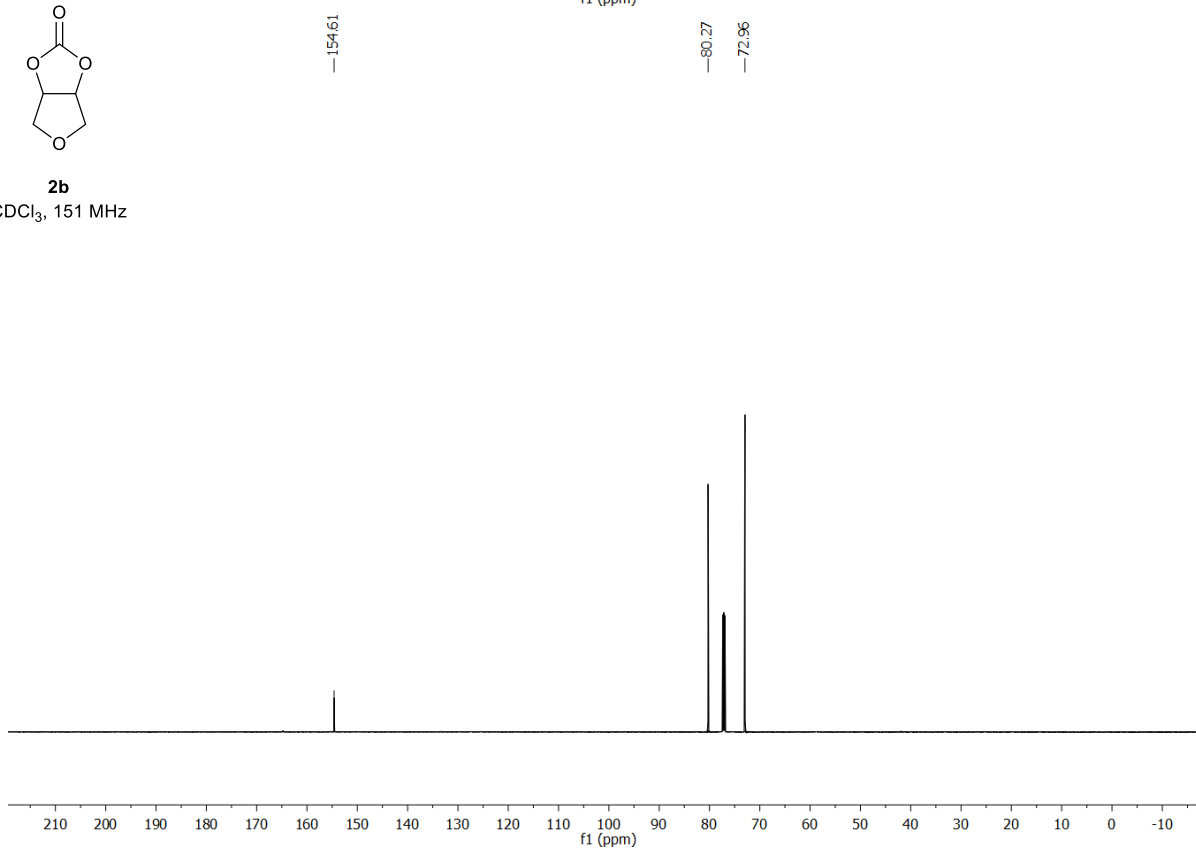

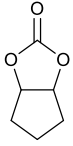

**2c**  
CDCl<sub>3</sub>, 600 MHz

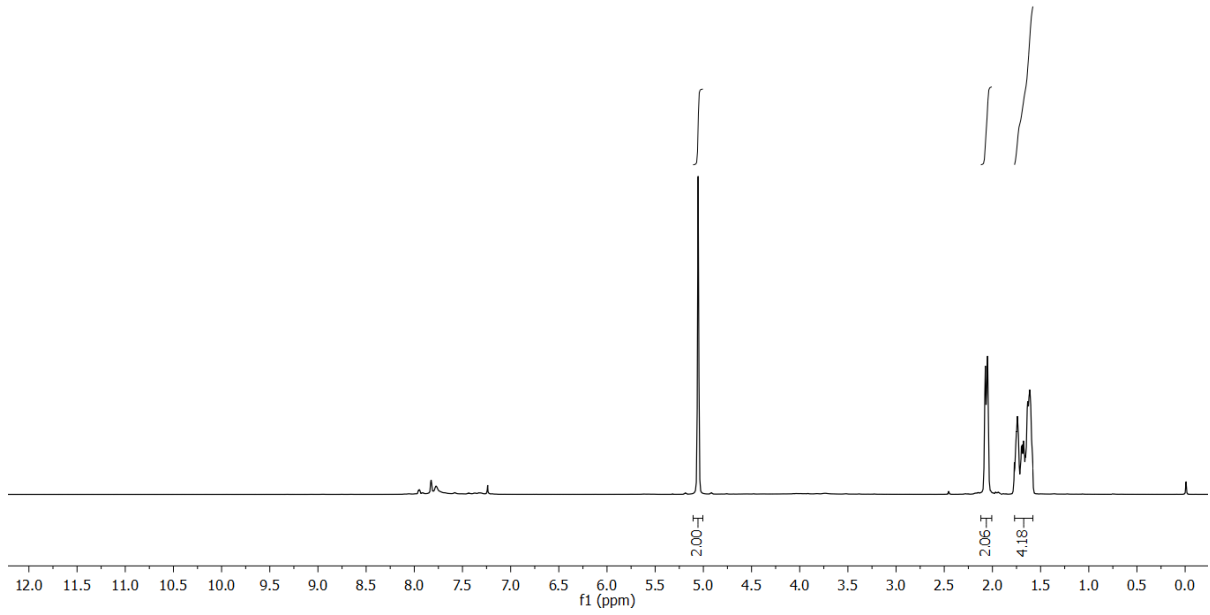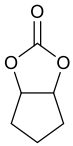

**2c**  
CDCl<sub>3</sub>, 151 MHz

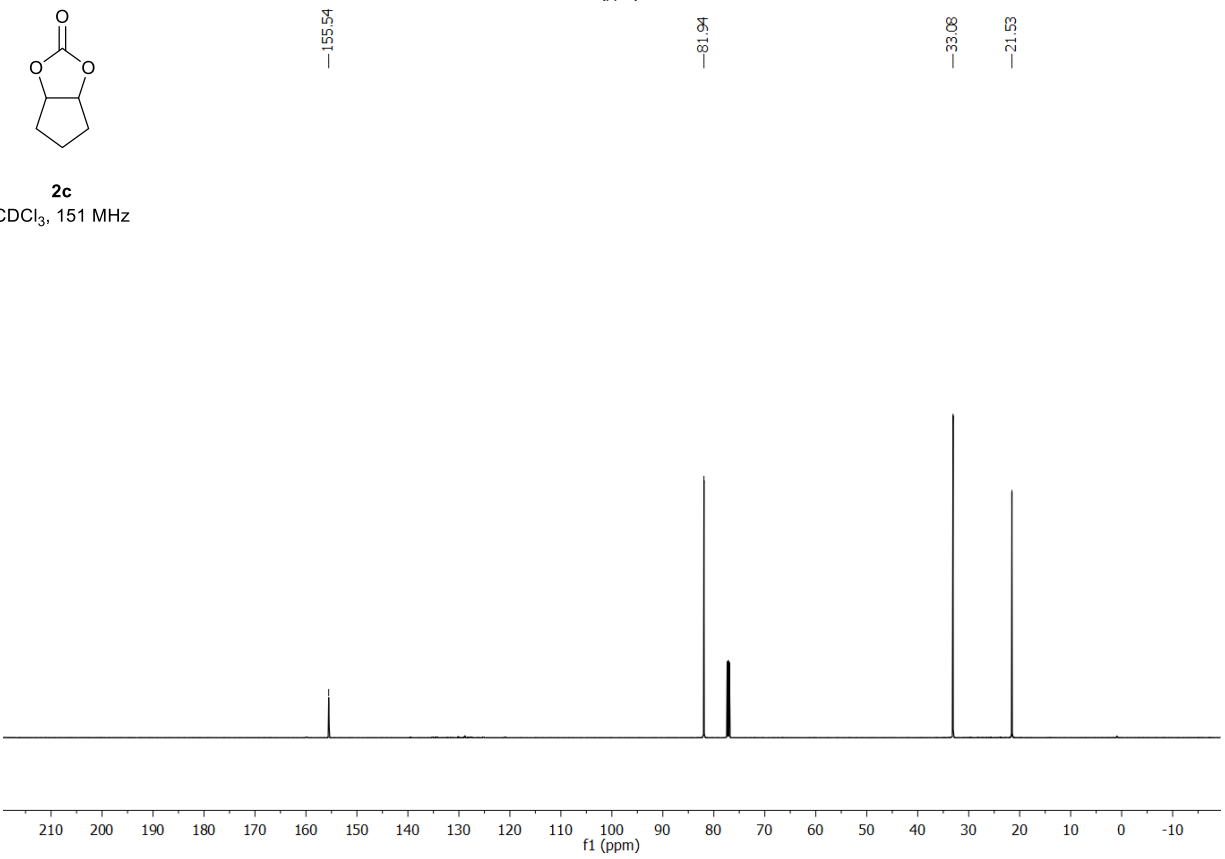

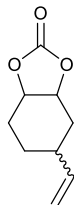

**2d**  
CDCl<sub>3</sub>, 600 MHz

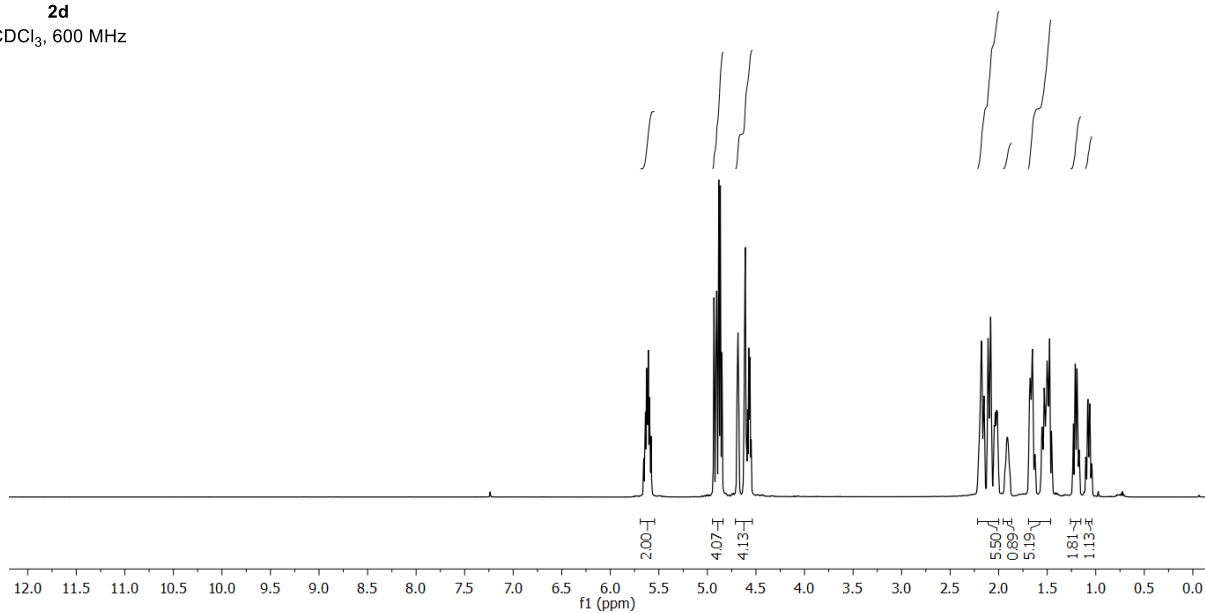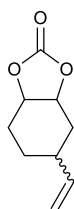

**2d**  
CDCl<sub>3</sub>, 151 MHz

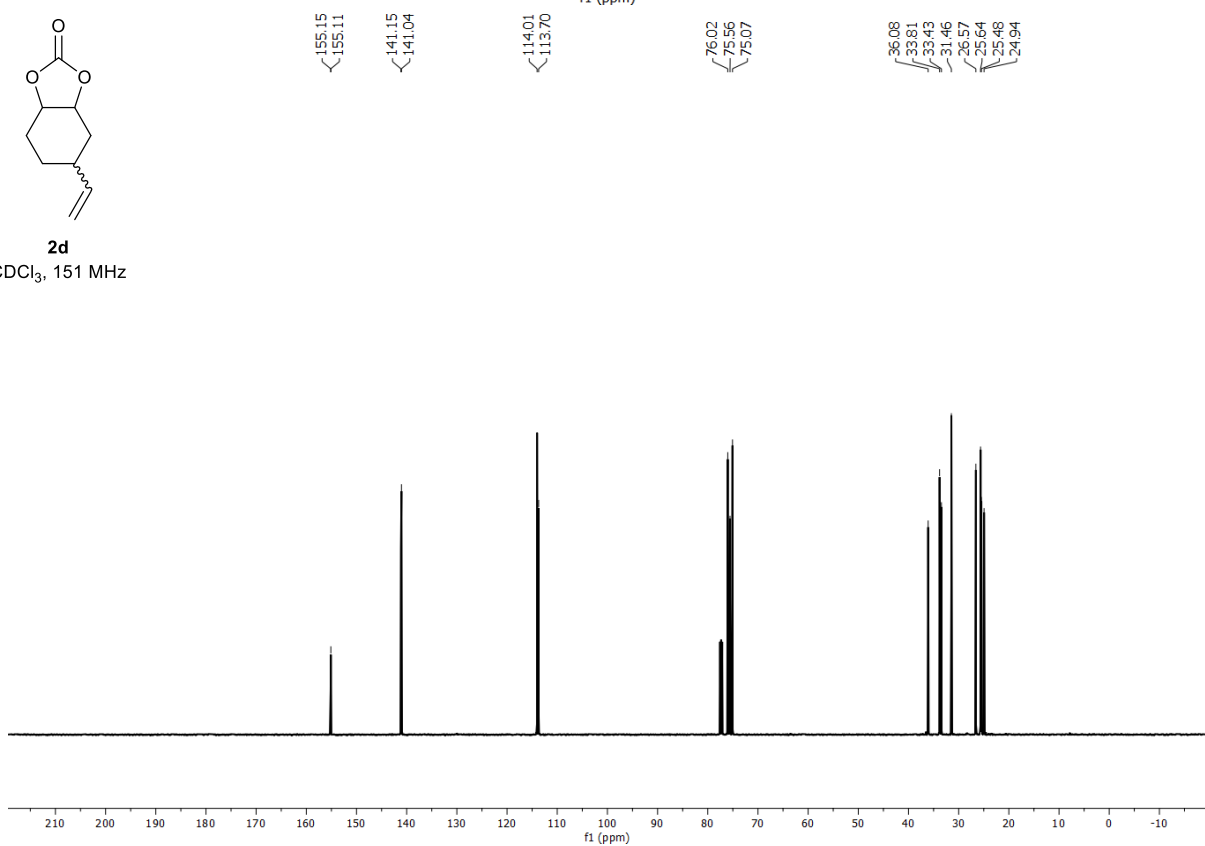

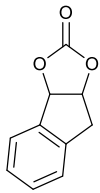

**2e**  
CDCl<sub>3</sub>, 600 MHz

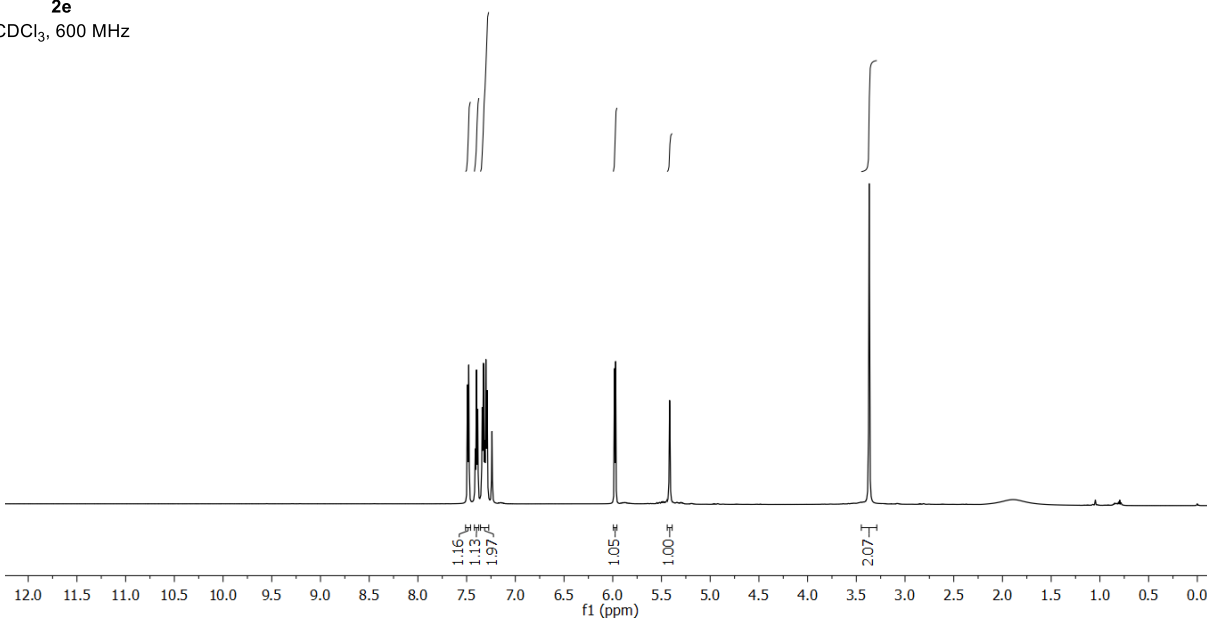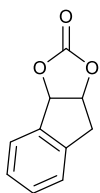

**2e**  
CDCl<sub>3</sub>, 151 MHz

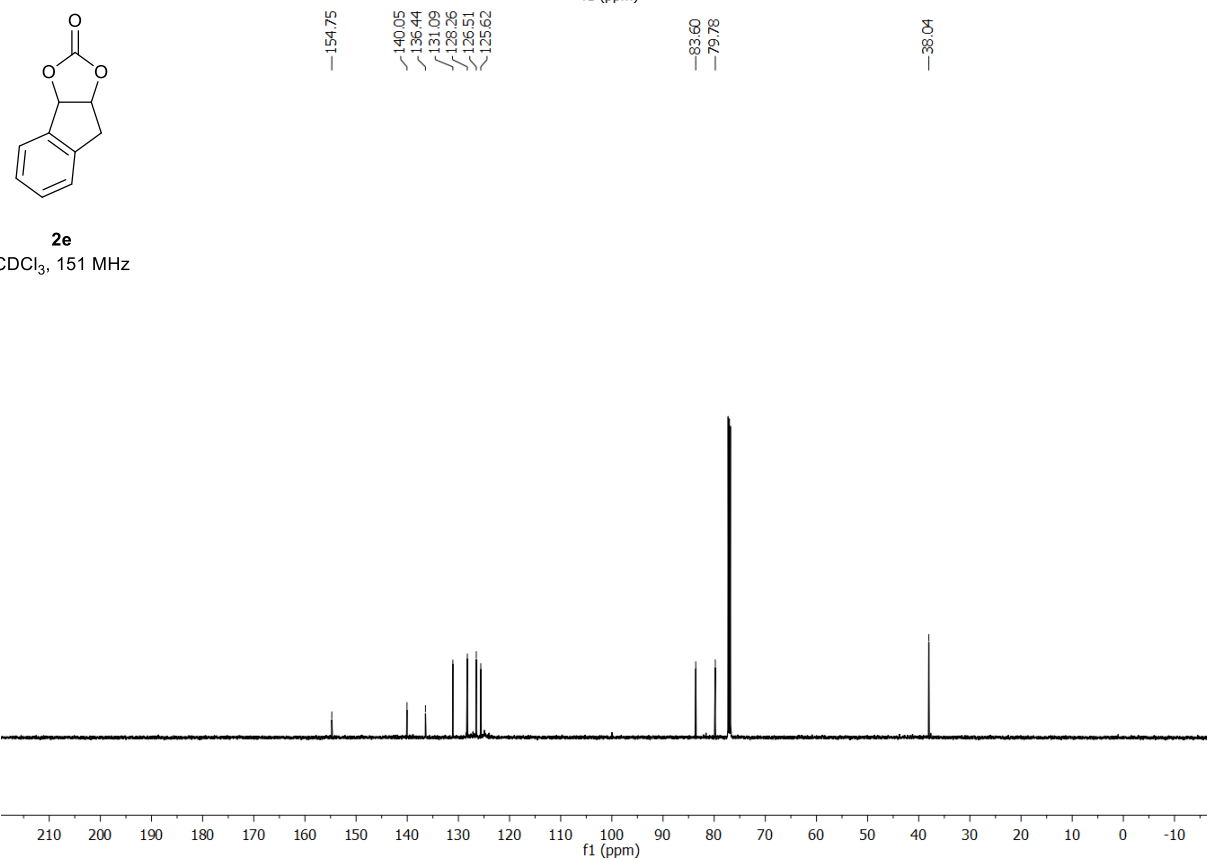

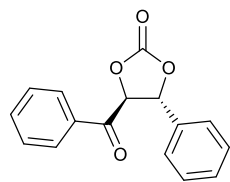

**2f**  
CDCl<sub>3</sub>, 600 MHz

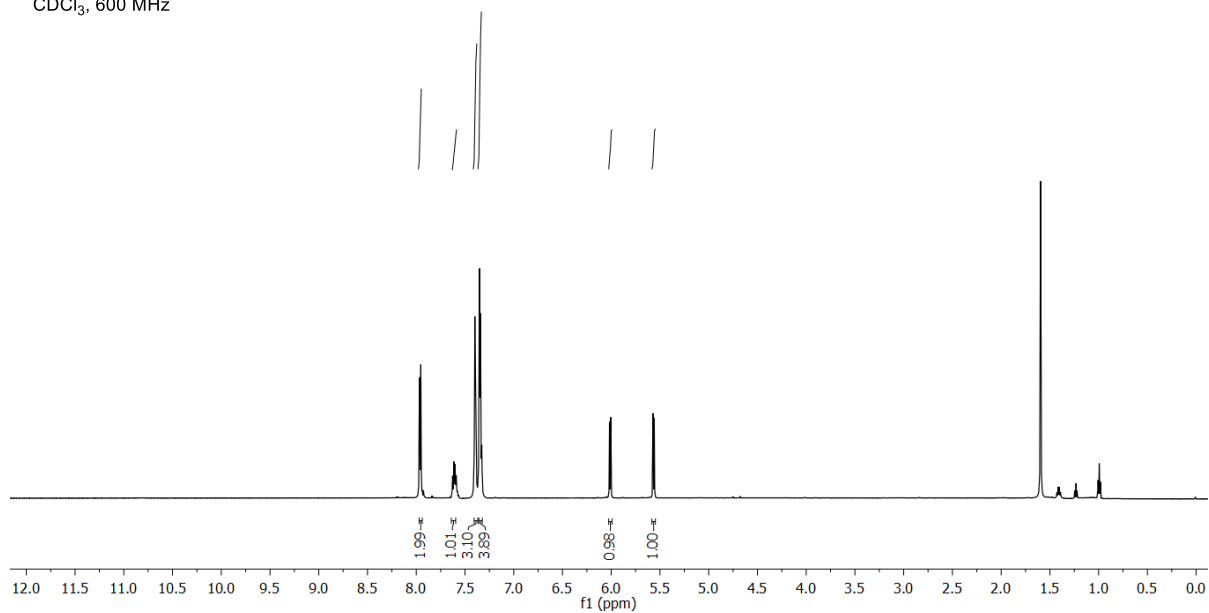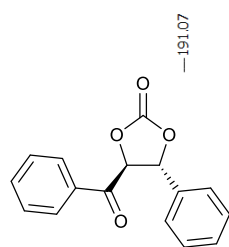

**2f**  
CDCl<sub>3</sub>, 151 MHz

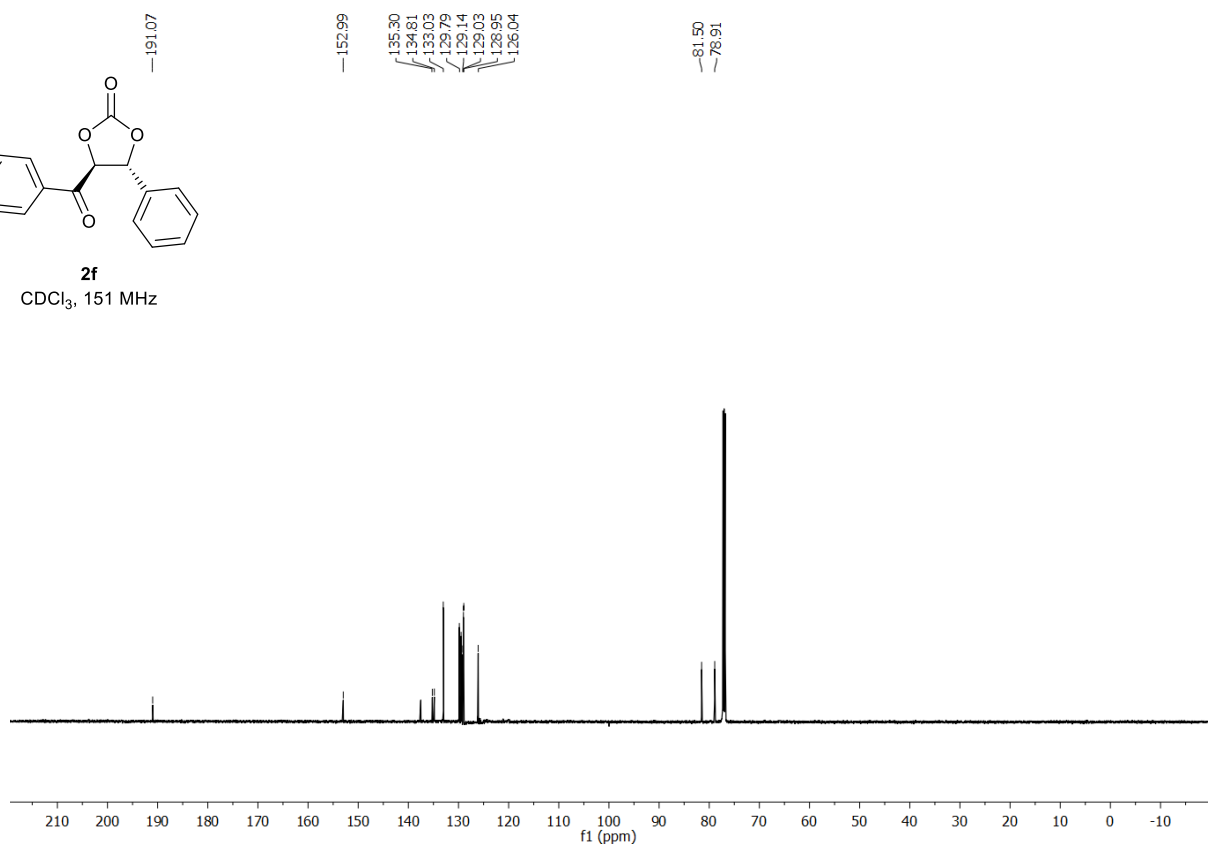

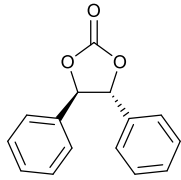

**2g**  
CDCl<sub>3</sub>, 600 MHz

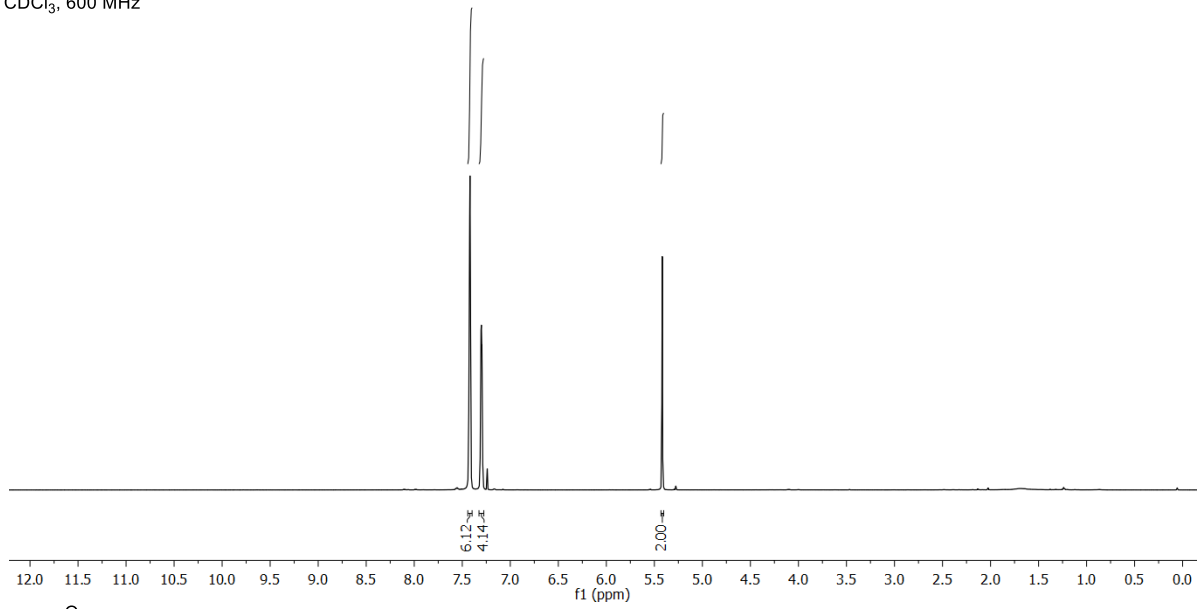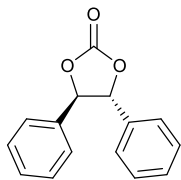

**2g**  
CDCl<sub>3</sub>, 151 MHz

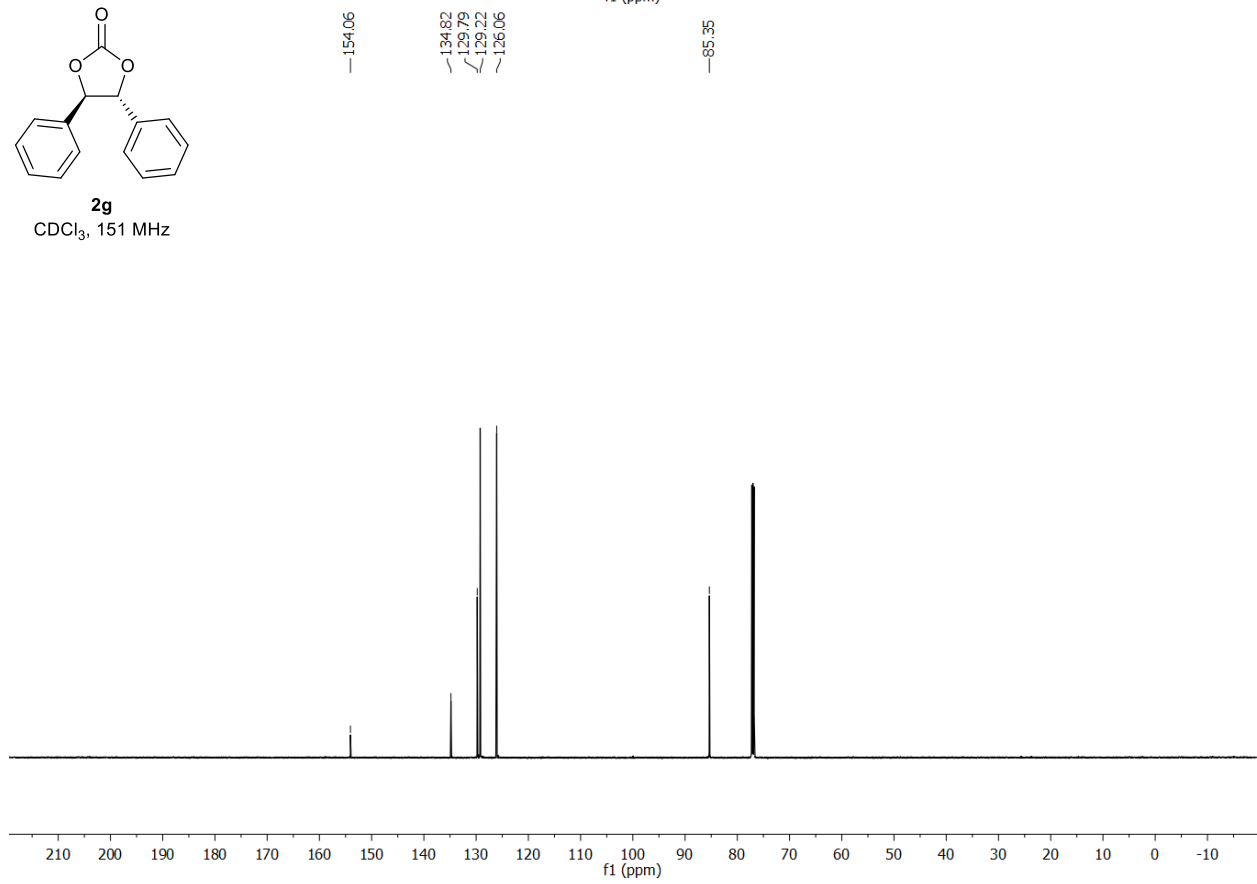

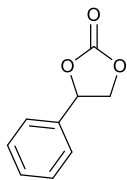

**2h**  
CDCl<sub>3</sub>, 600 MHz

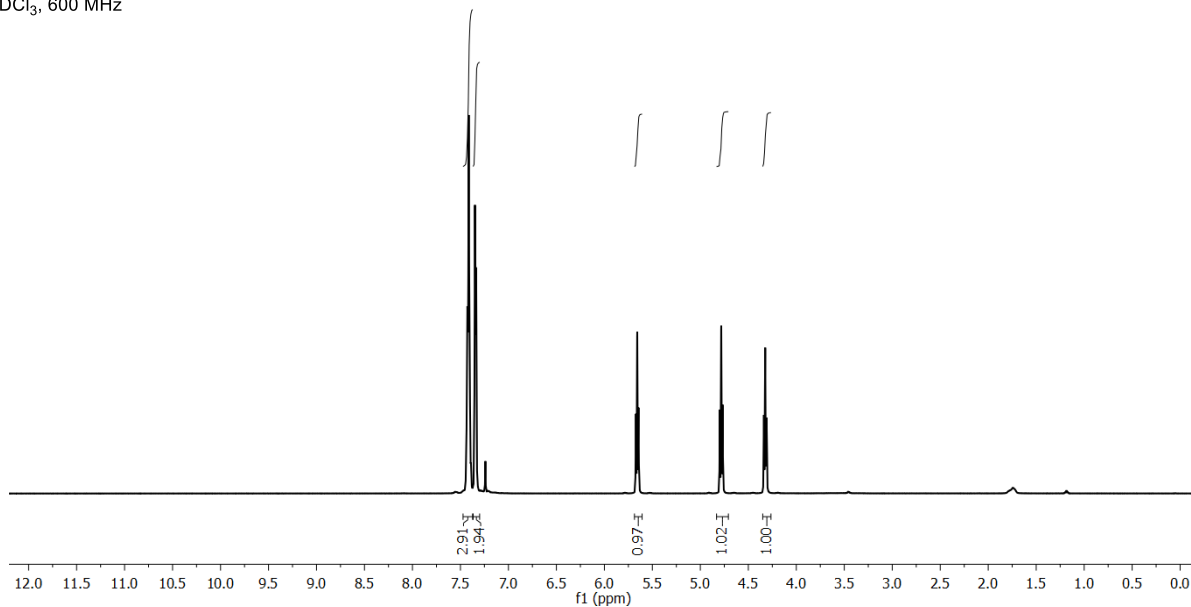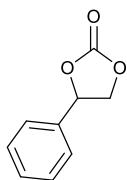

**2h**  
CDCl<sub>3</sub>, 151 MHz

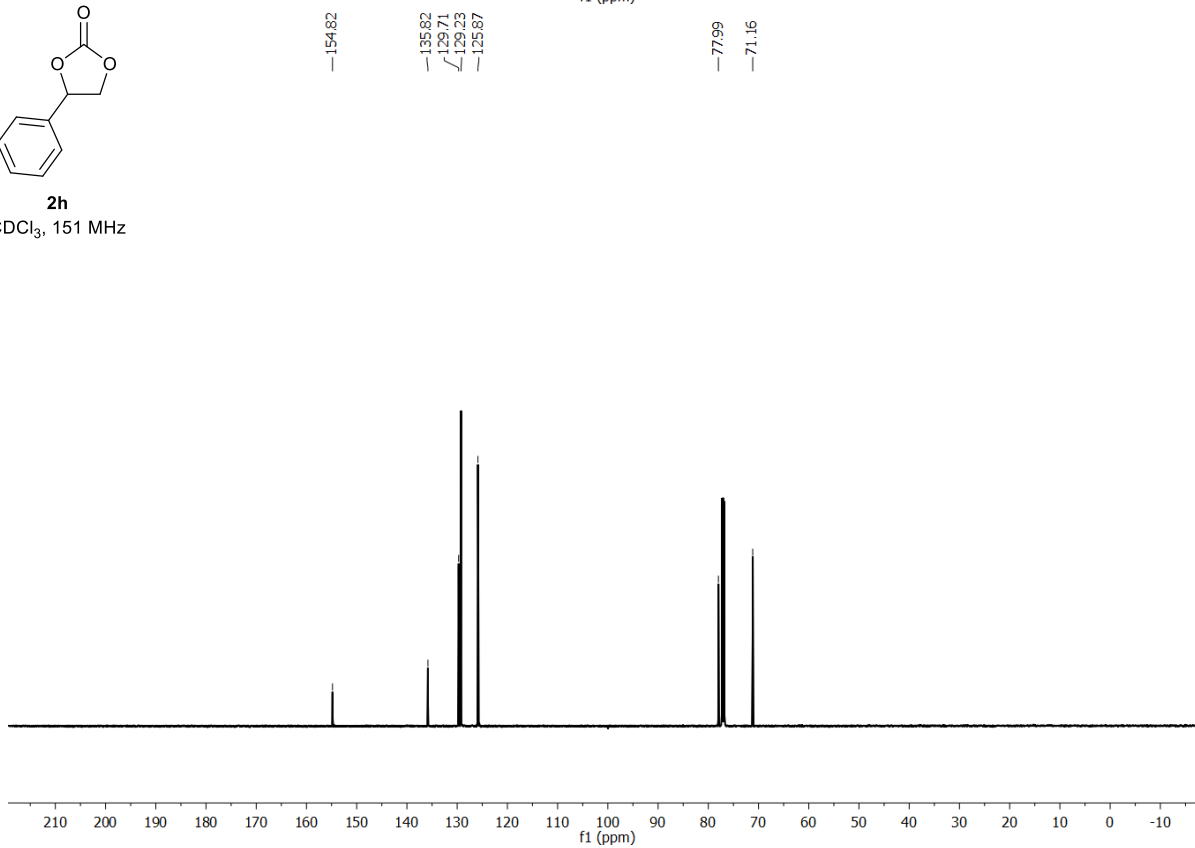

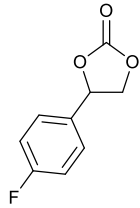

**2i**  
CDCl<sub>3</sub>, 600 MHz

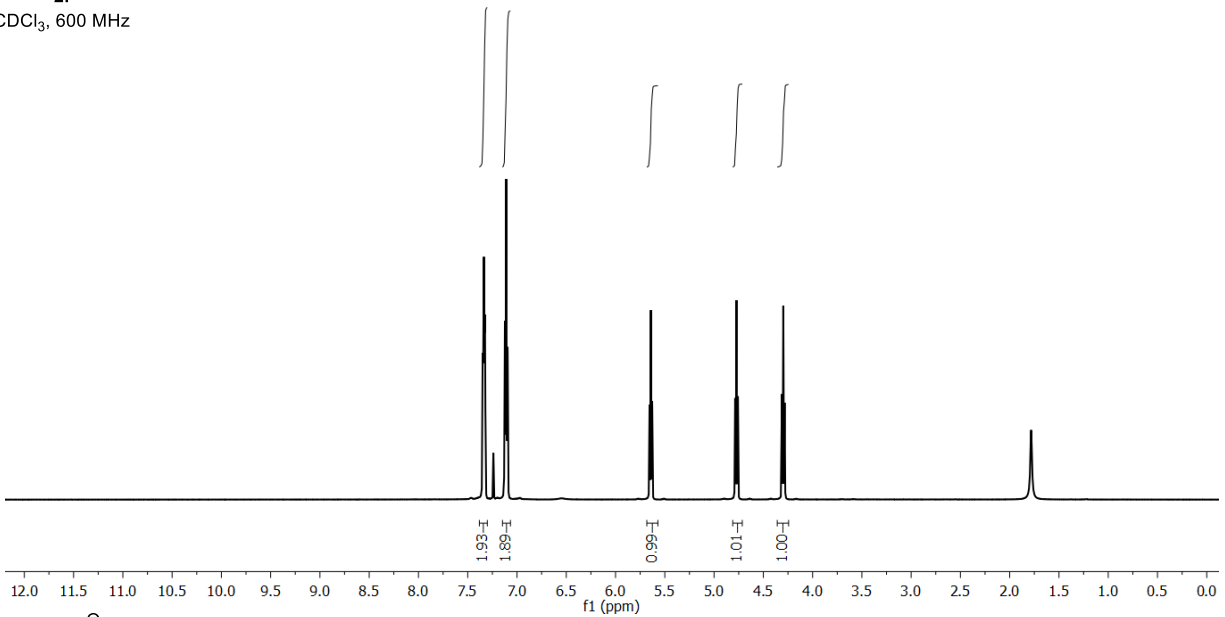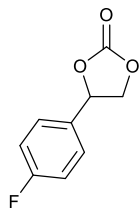

**2i**  
CDCl<sub>3</sub>, 151 MHz

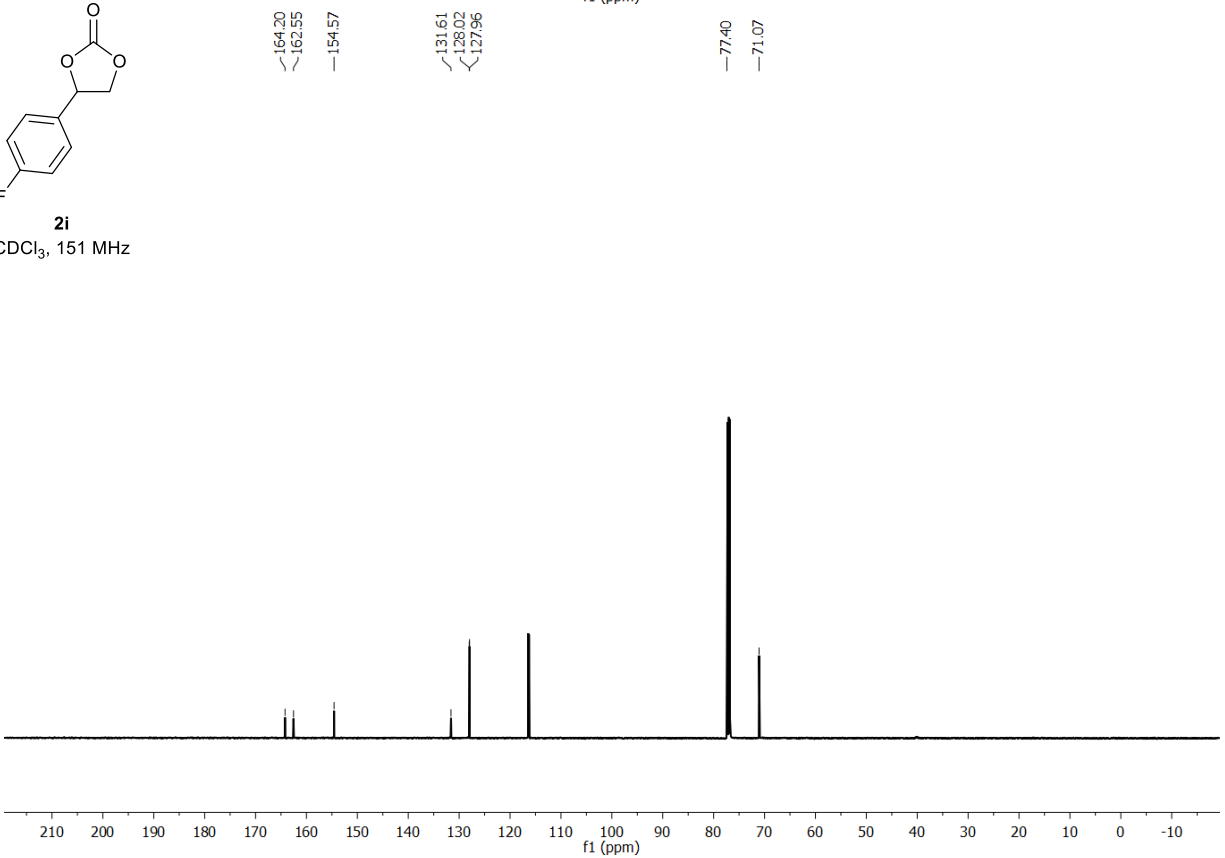



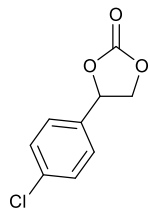

**2j**

CDCl<sub>3</sub>, 600 MHz

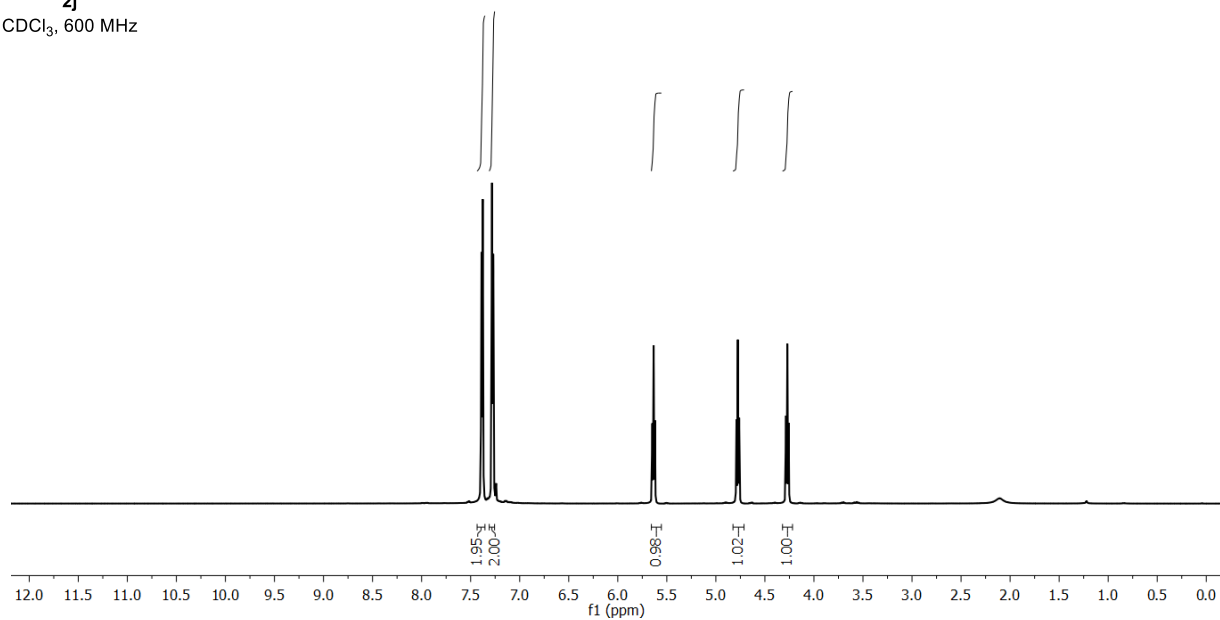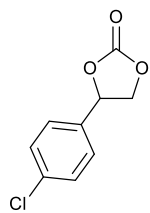

**2j**

CDCl<sub>3</sub>, 151 MHz

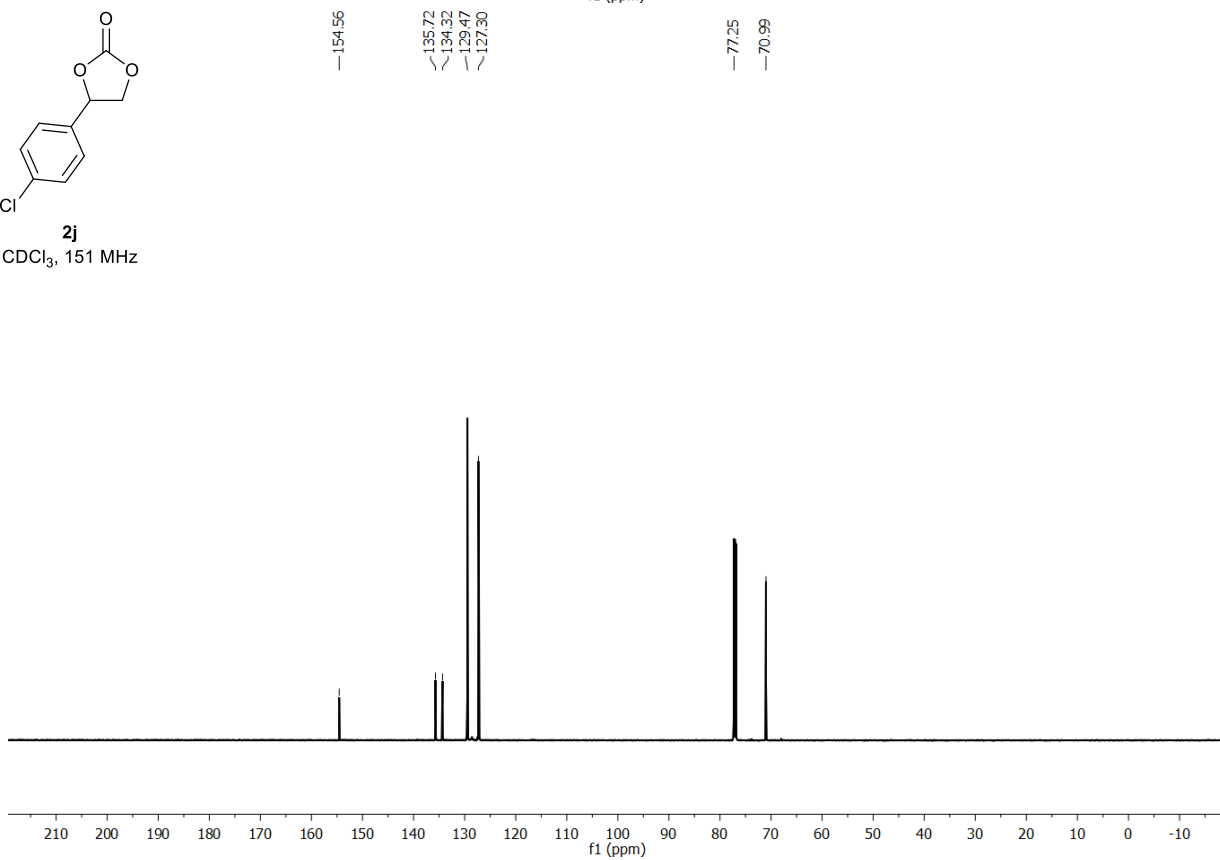

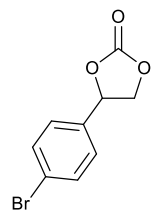

**2k**  
CDCl<sub>3</sub>, 600 MHz

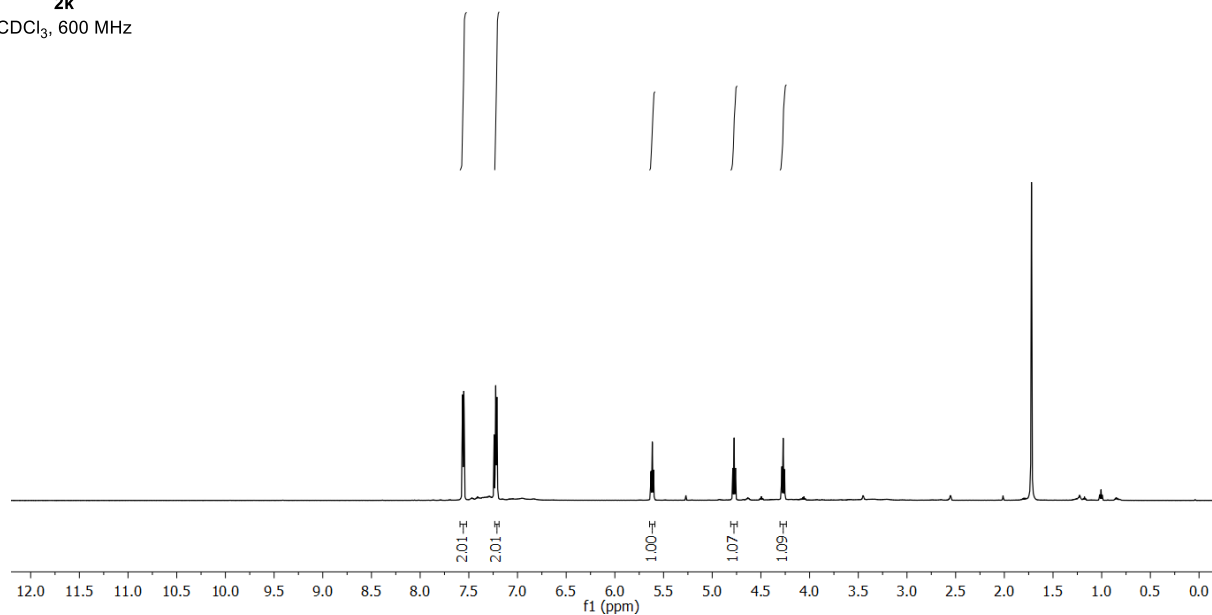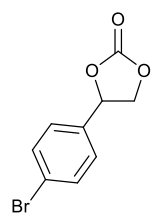

**2k**  
CDCl<sub>3</sub>, 151 MHz

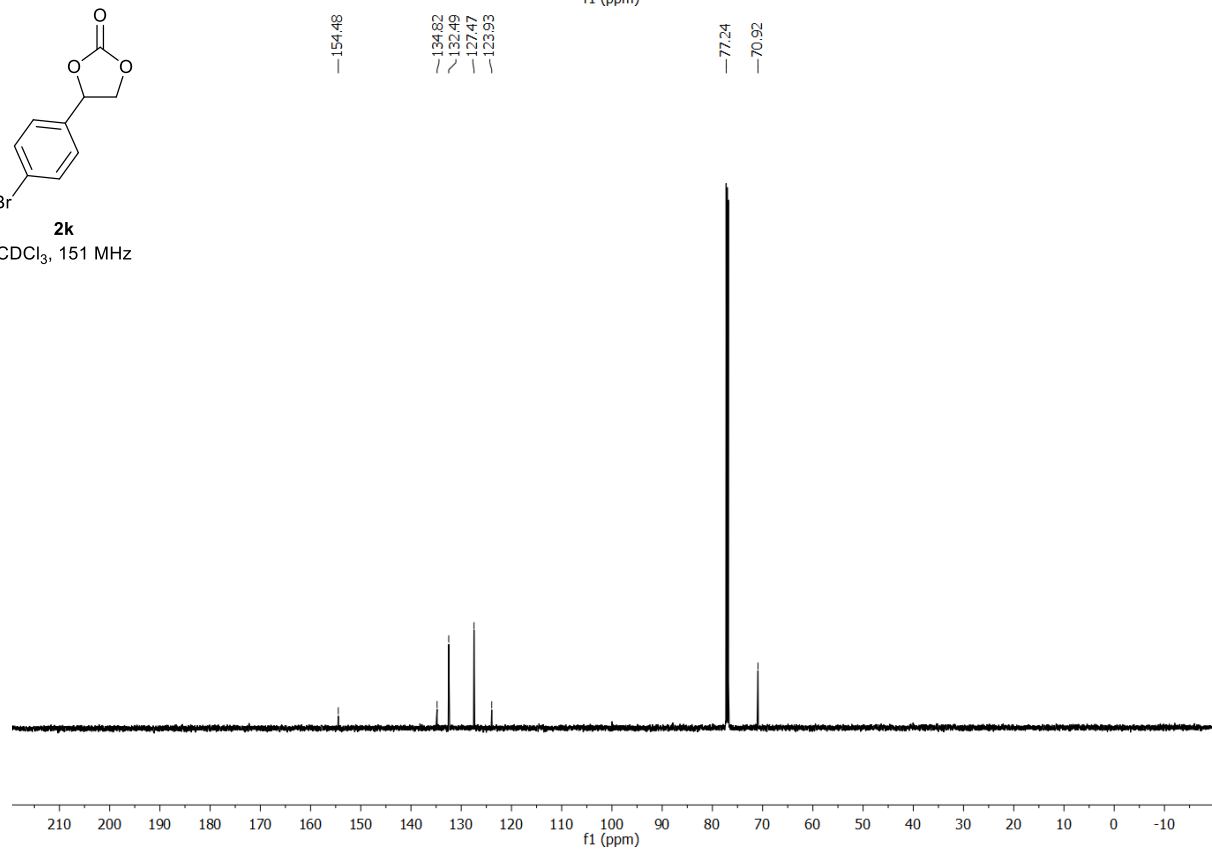

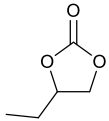

**21**  
CDCl<sub>3</sub>, 600 MHz

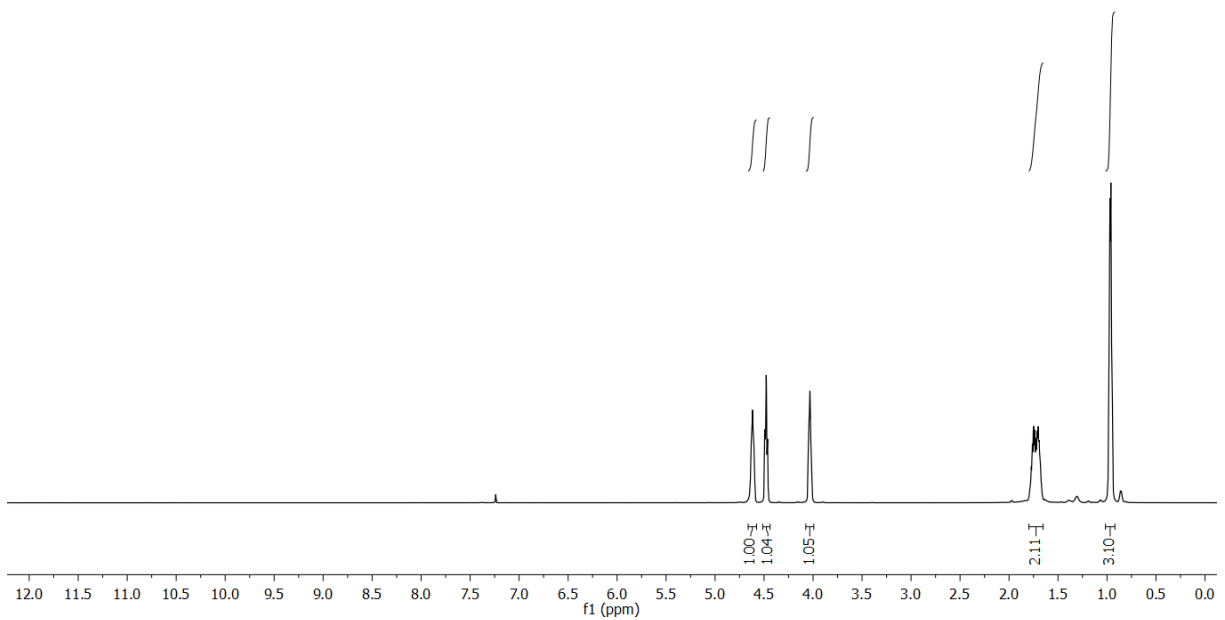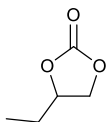

**21**  
CDCl<sub>3</sub>, 151 MHz

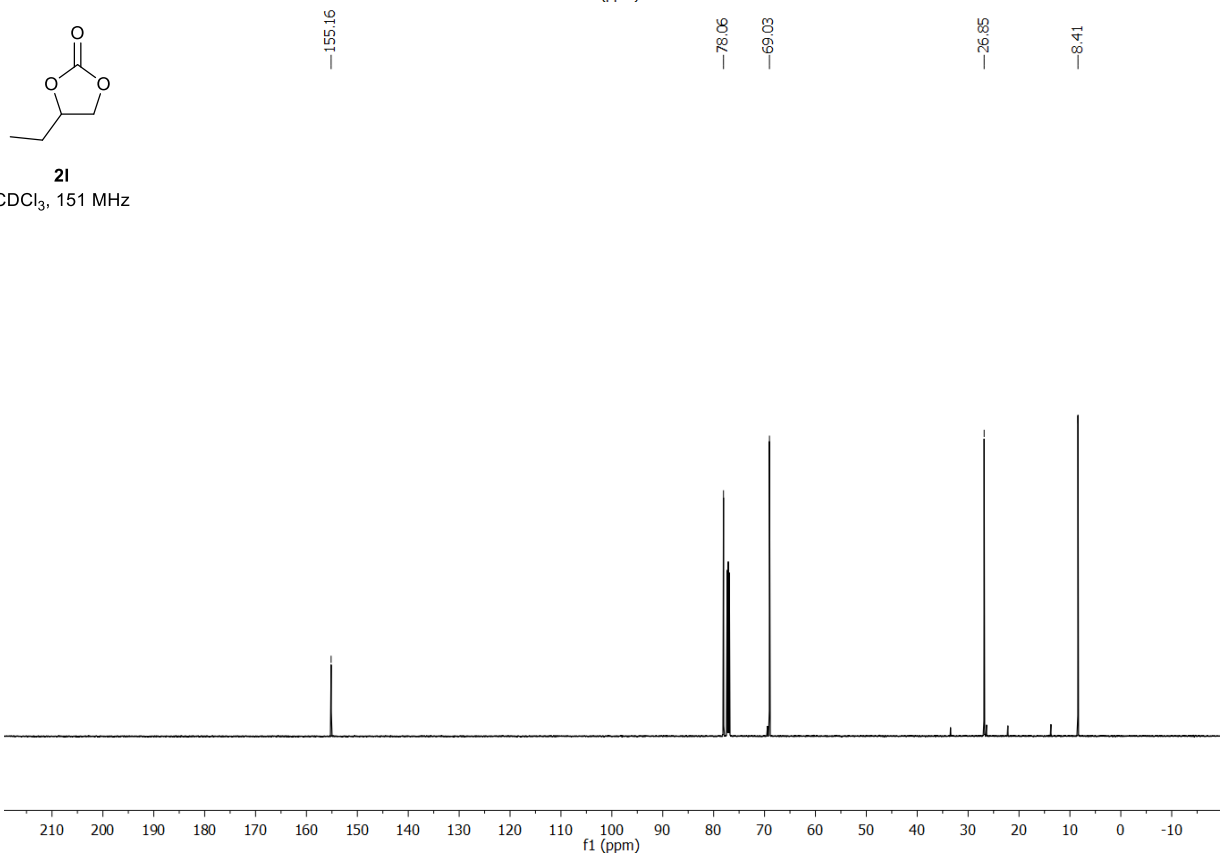

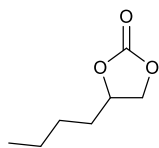

**2m**  
CDCl<sub>3</sub>, 600 MHz

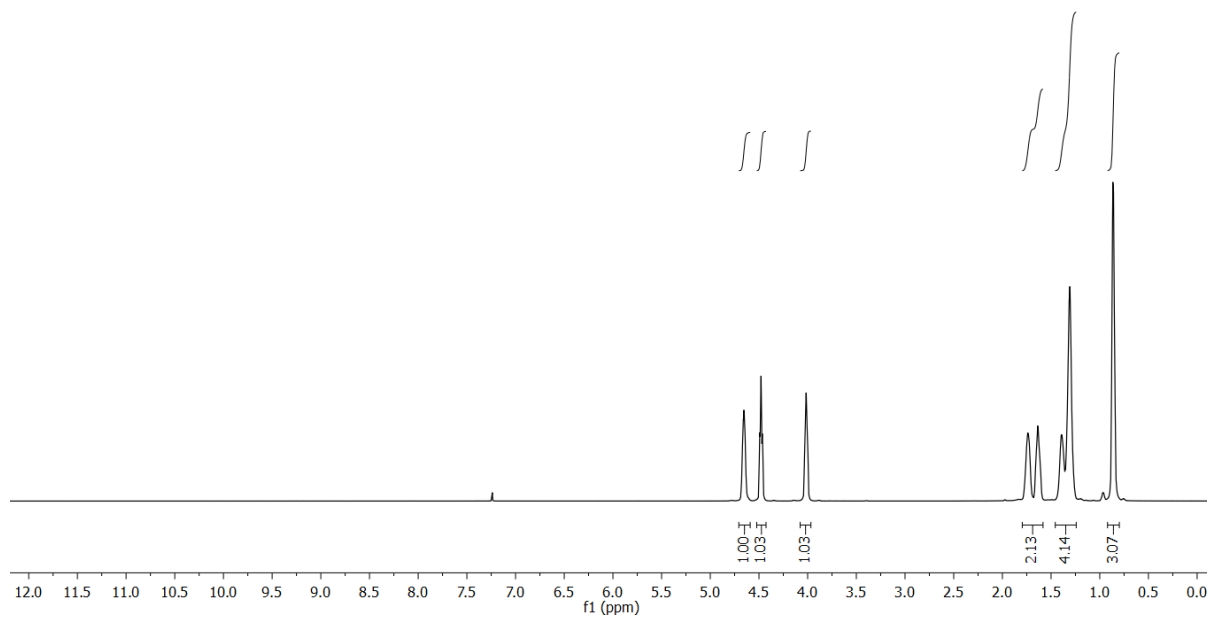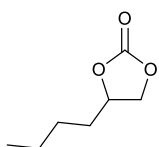

**2m**  
CDCl<sub>3</sub>, 151 MHz

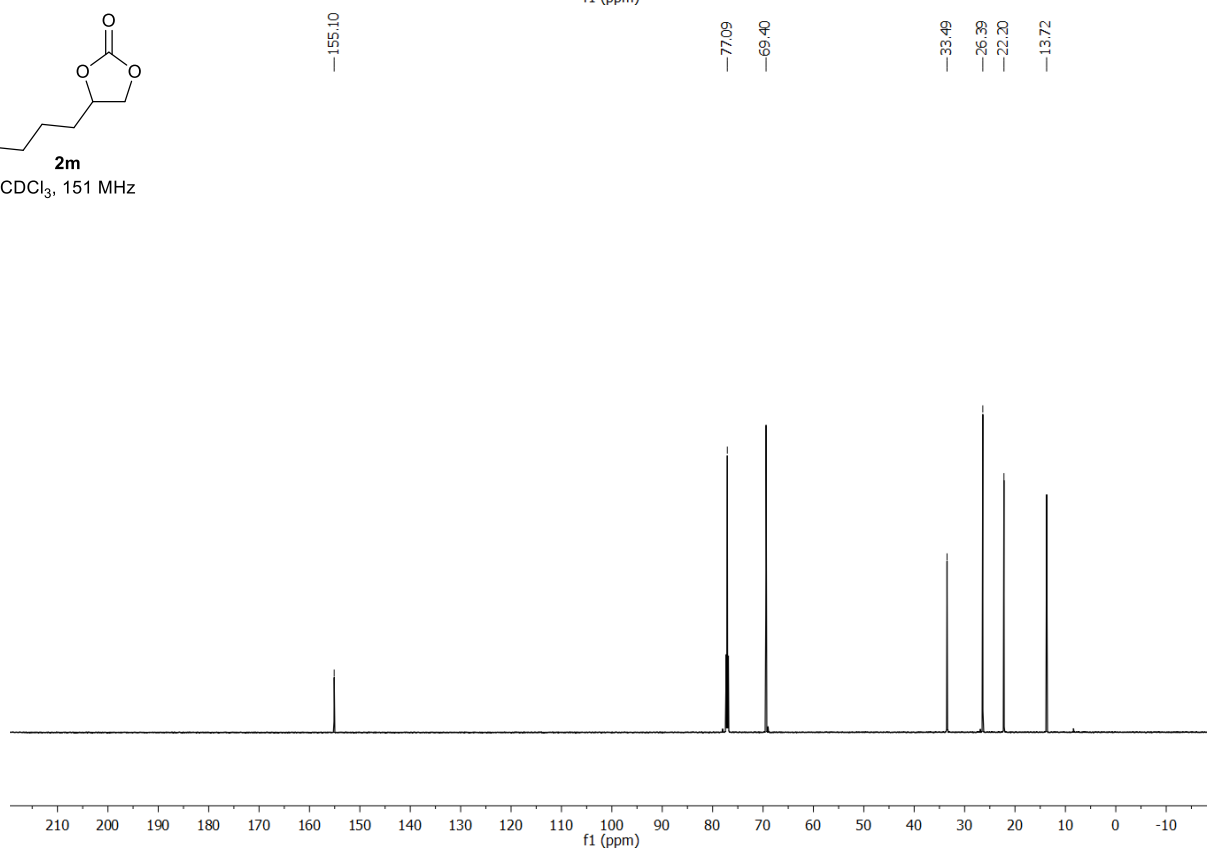

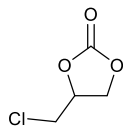

**2n**  
CDCl<sub>3</sub>, 600 MHz

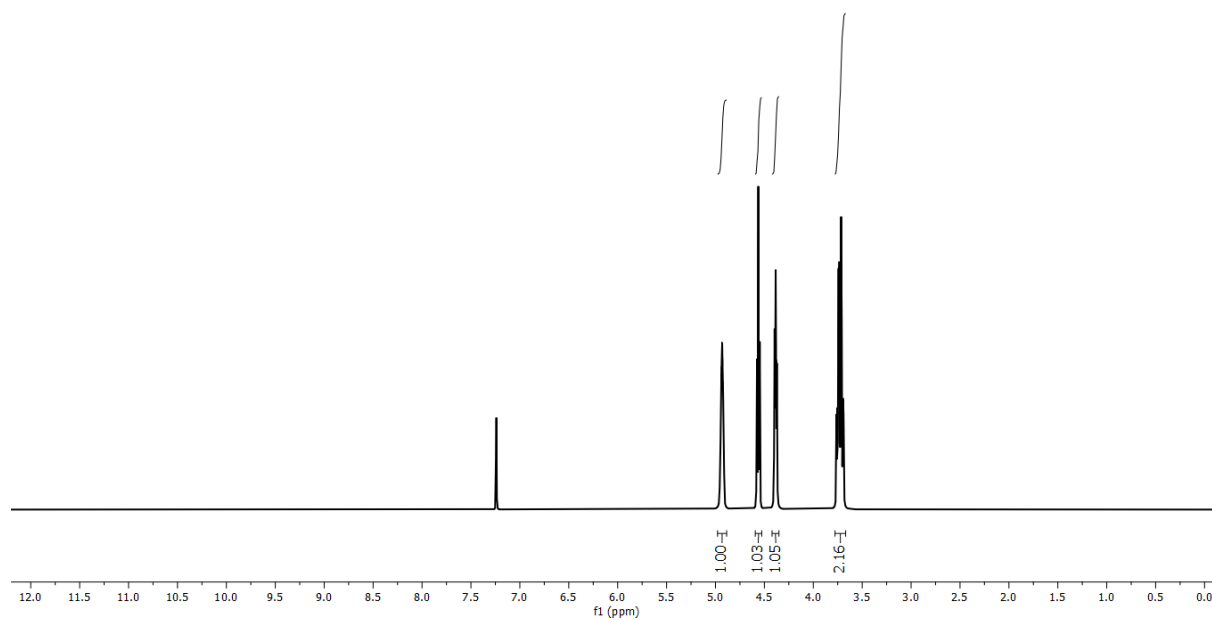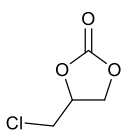

**2n**  
CDCl<sub>3</sub>, 151 MHz

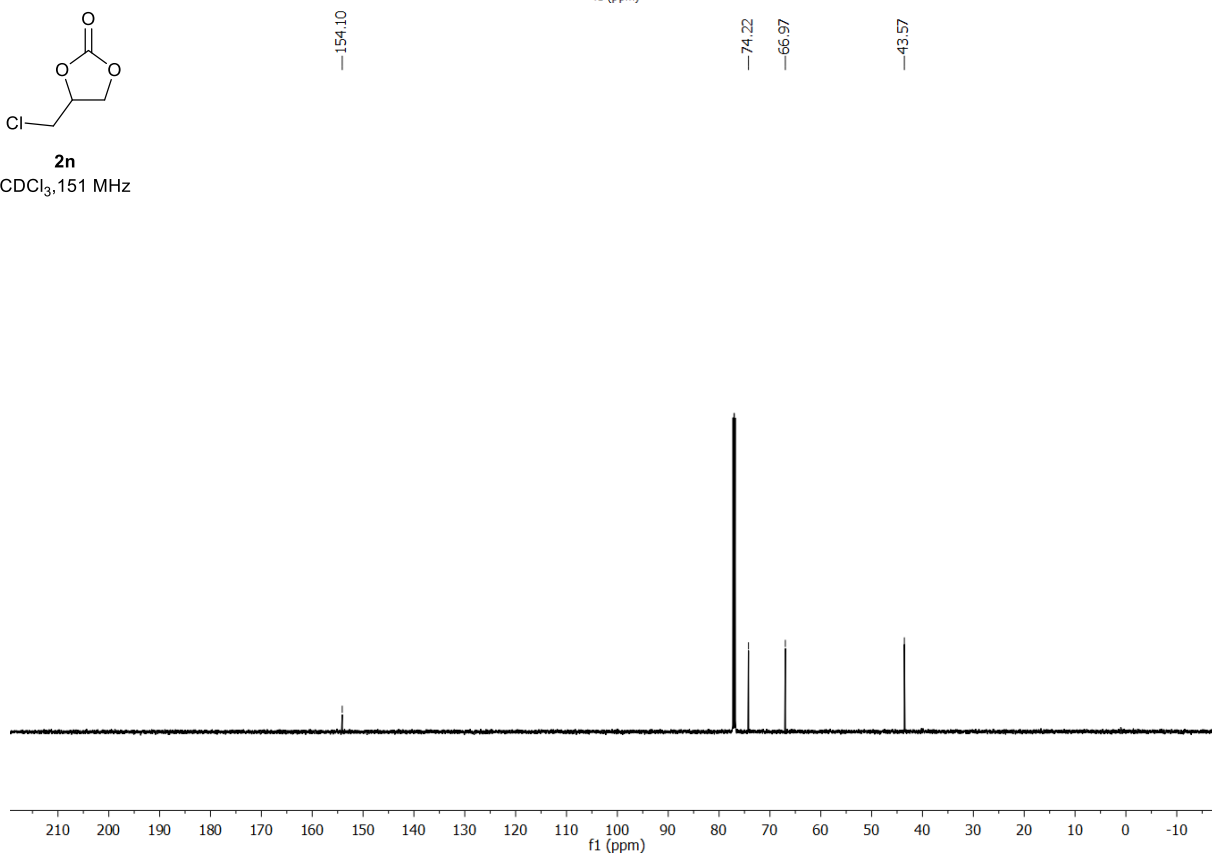

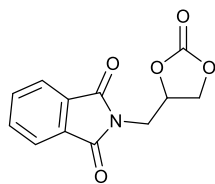

**2o**  
CDCl<sub>3</sub>, 600 MHz

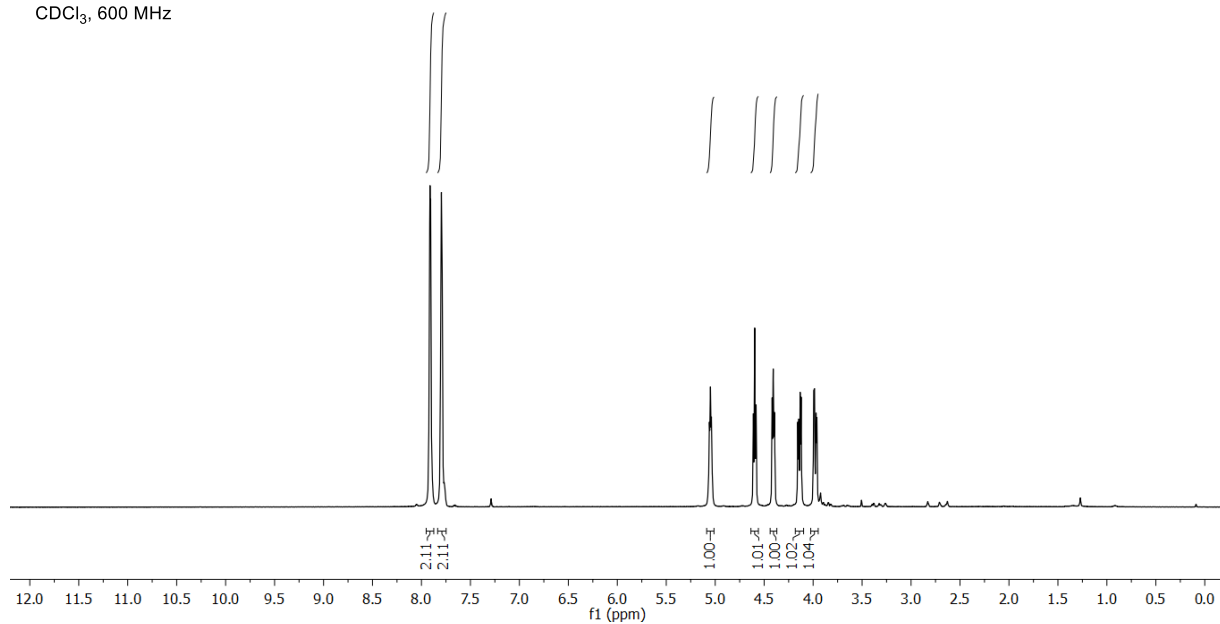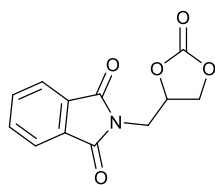

**2o**  
CDCl<sub>3</sub>, 151 MHz

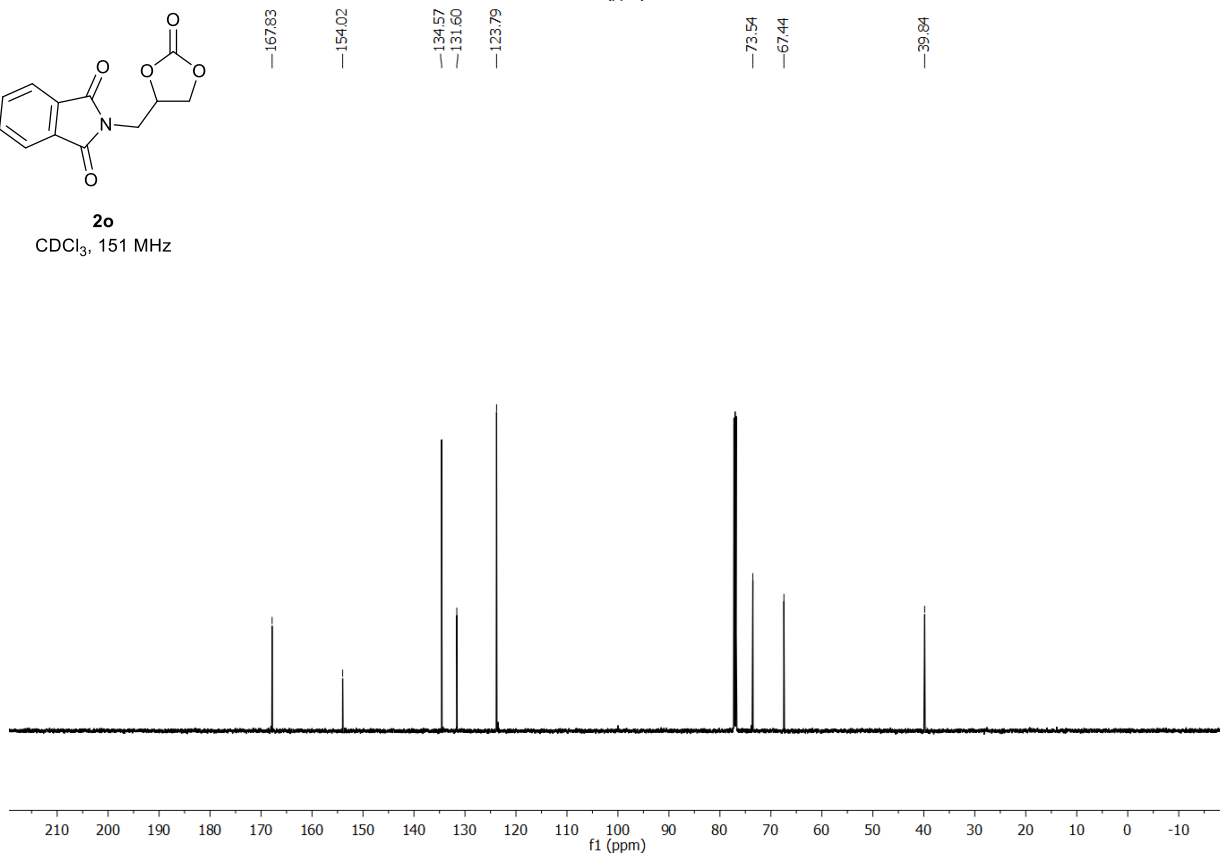

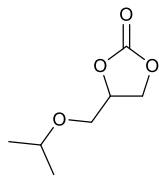

**2p**

CDCl<sub>3</sub>, 600 MHz

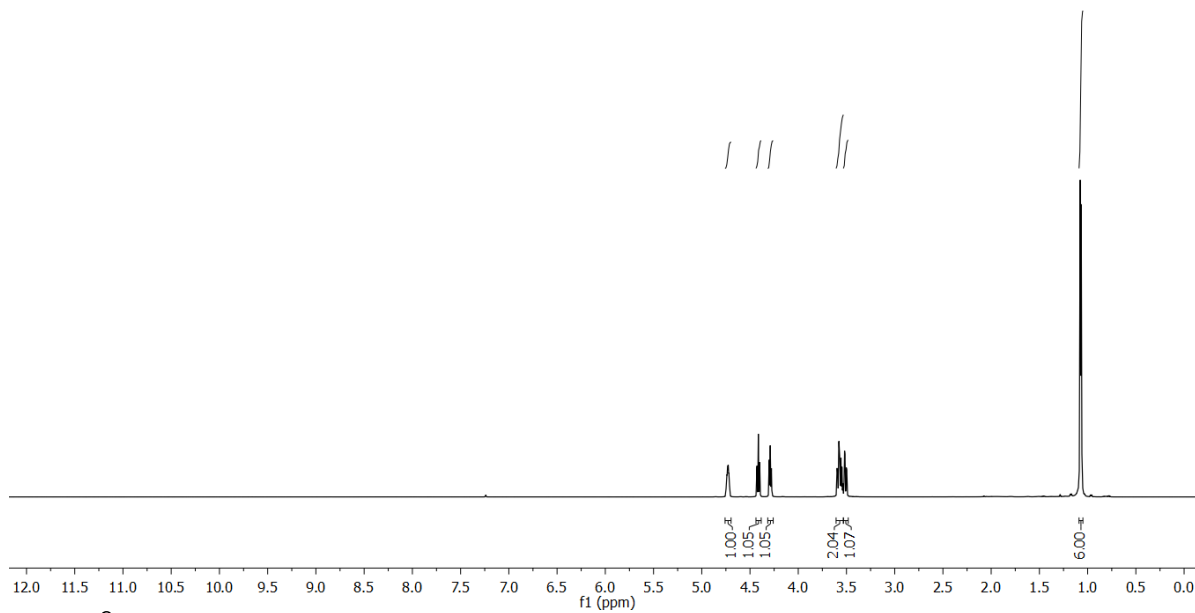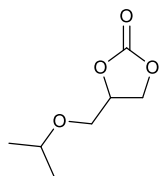

**2p**

CDCl<sub>3</sub>, 151 MHz

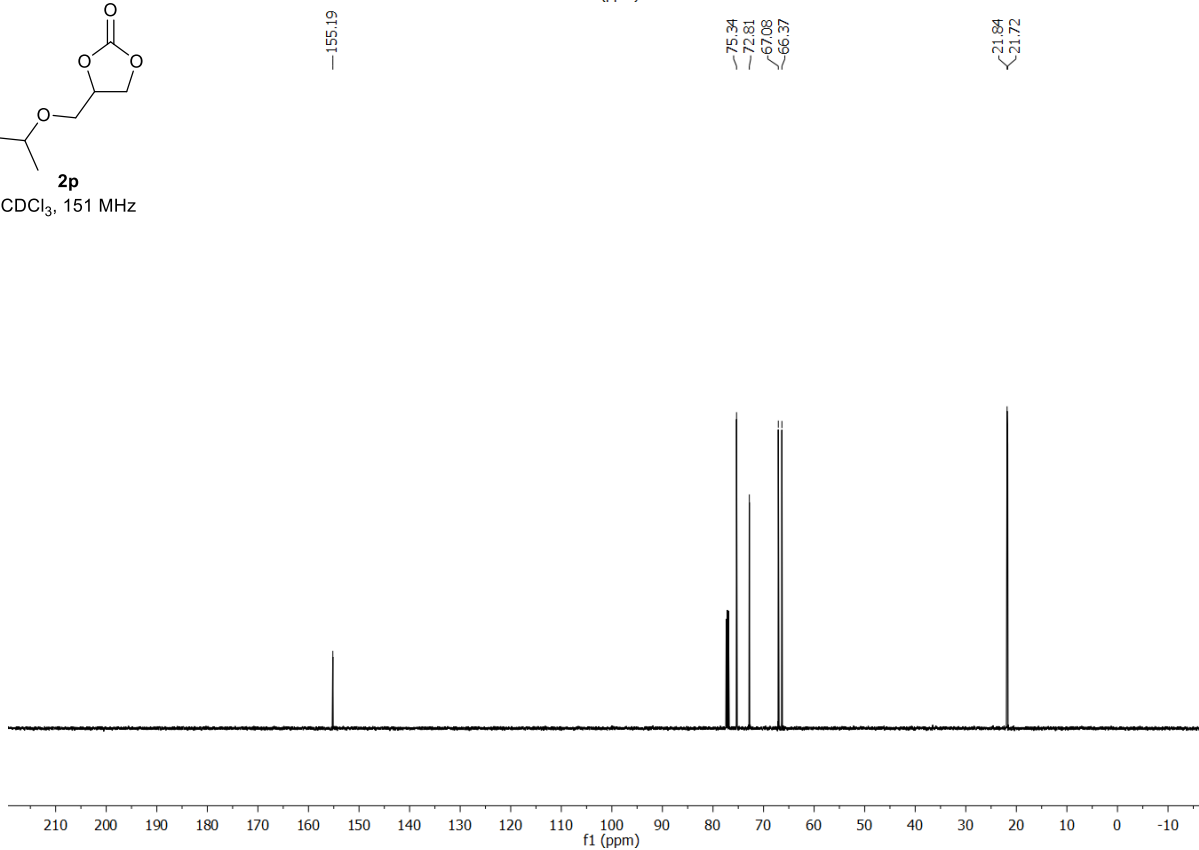

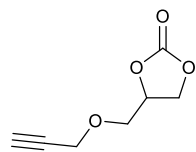

**2q**

CDCl<sub>3</sub>, 600 MHz

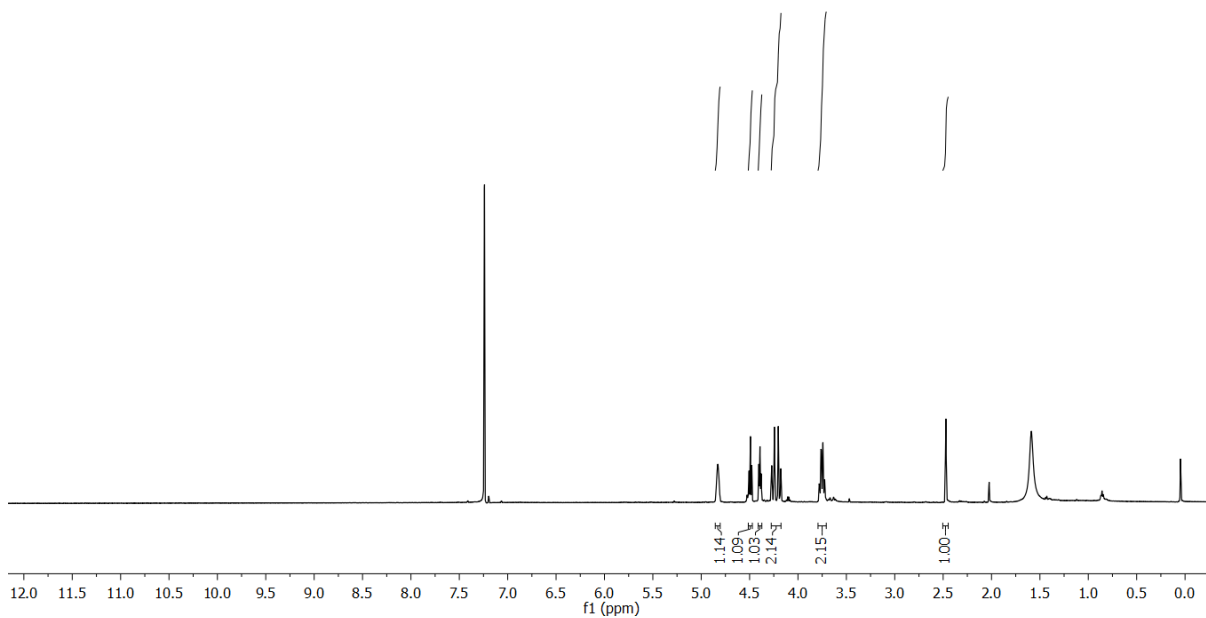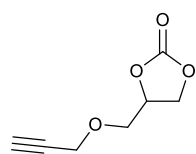

**2q**

CDCl<sub>3</sub>, 151 MHz

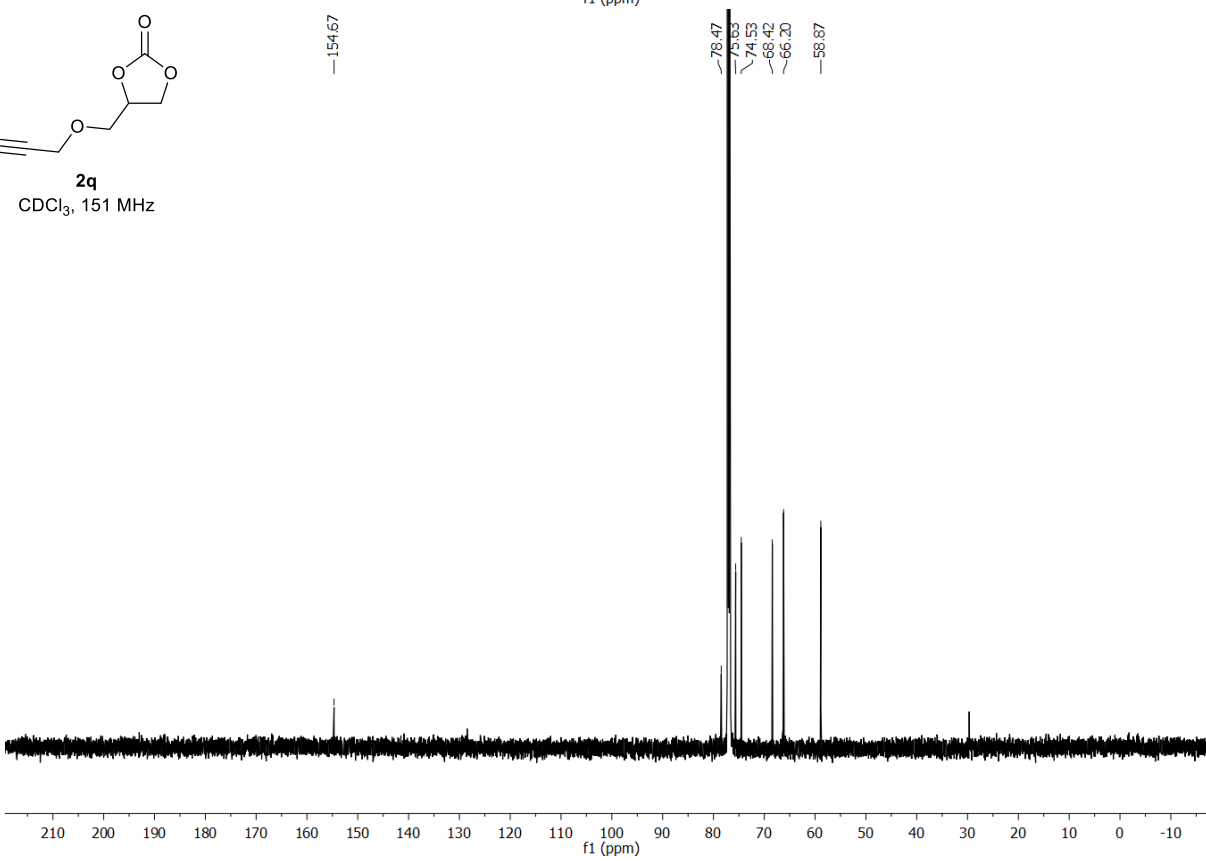



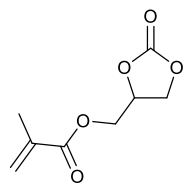

**2r**

CDCl<sub>3</sub>, 600 MHz

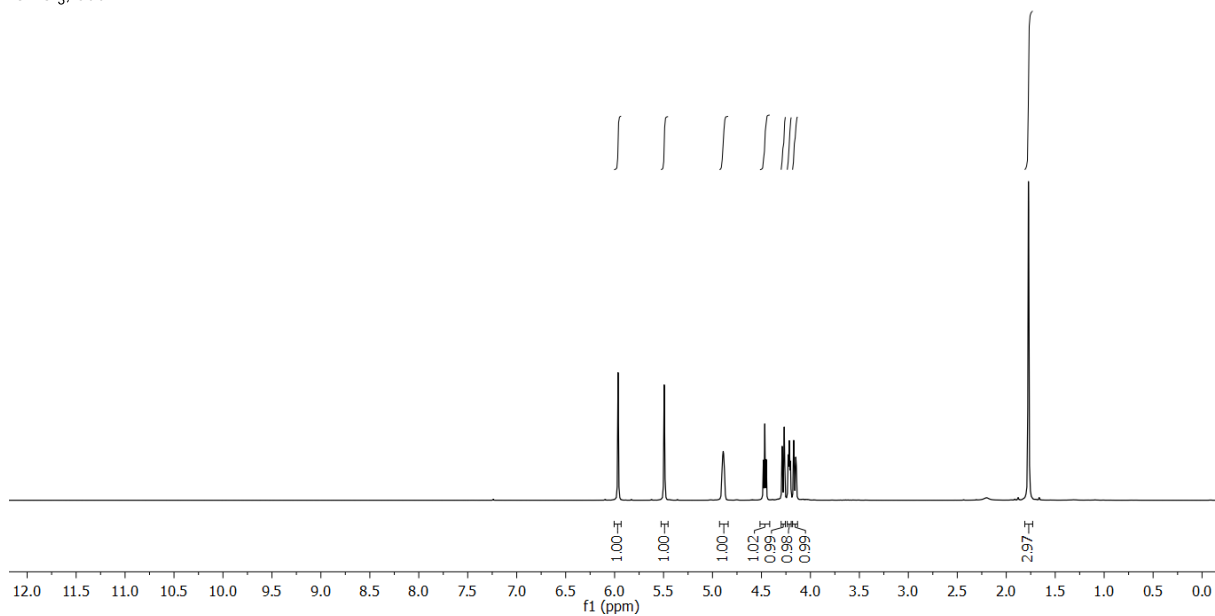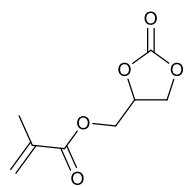

**2r**

CDCl<sub>3</sub>, 151 MHz

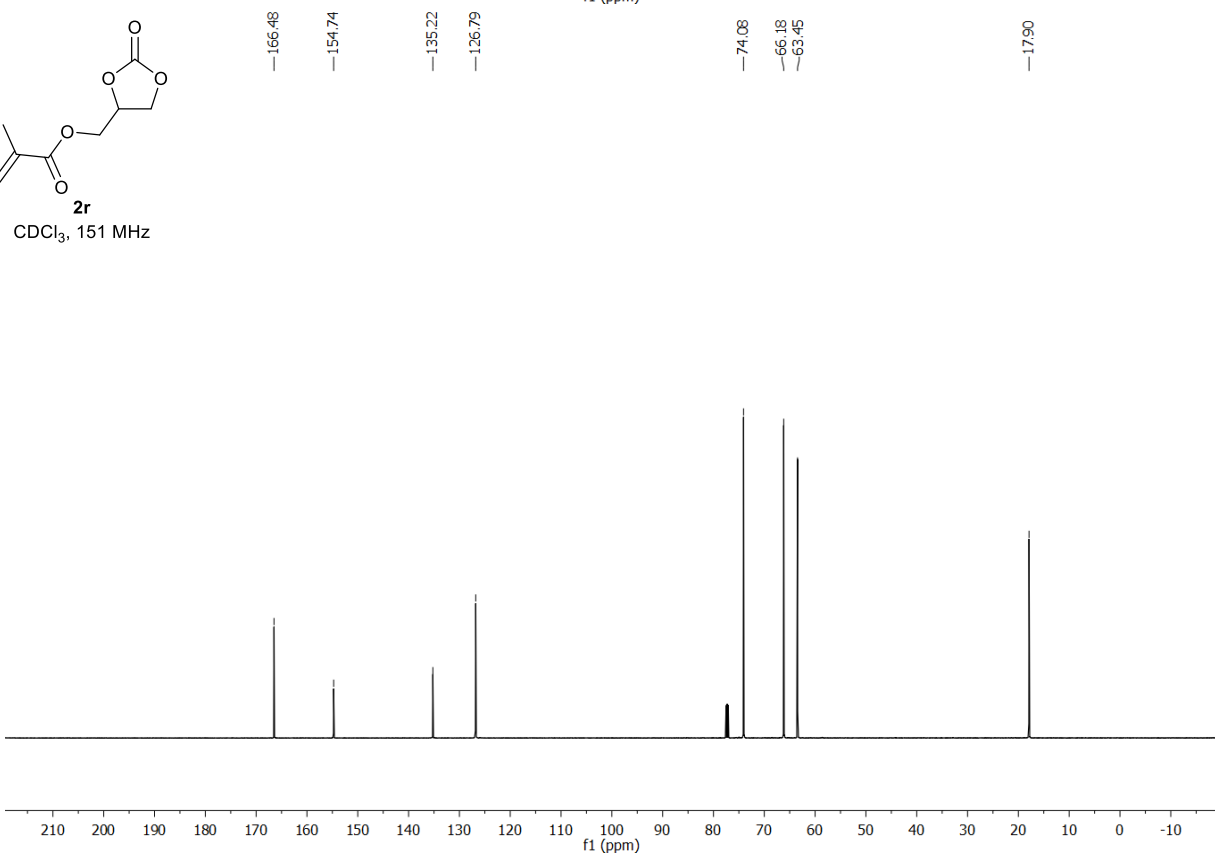

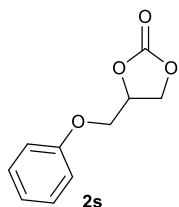

CDCl<sub>3</sub>, 600 MHz

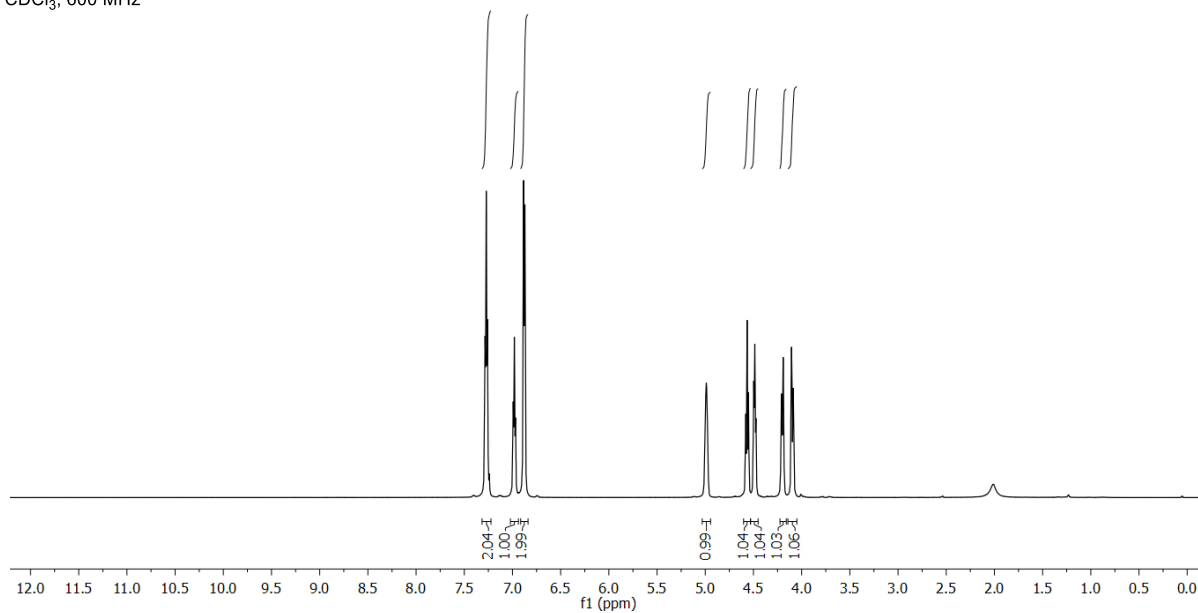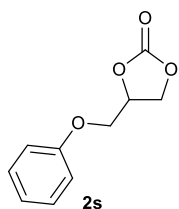

CDCl<sub>3</sub>, 600 MHz

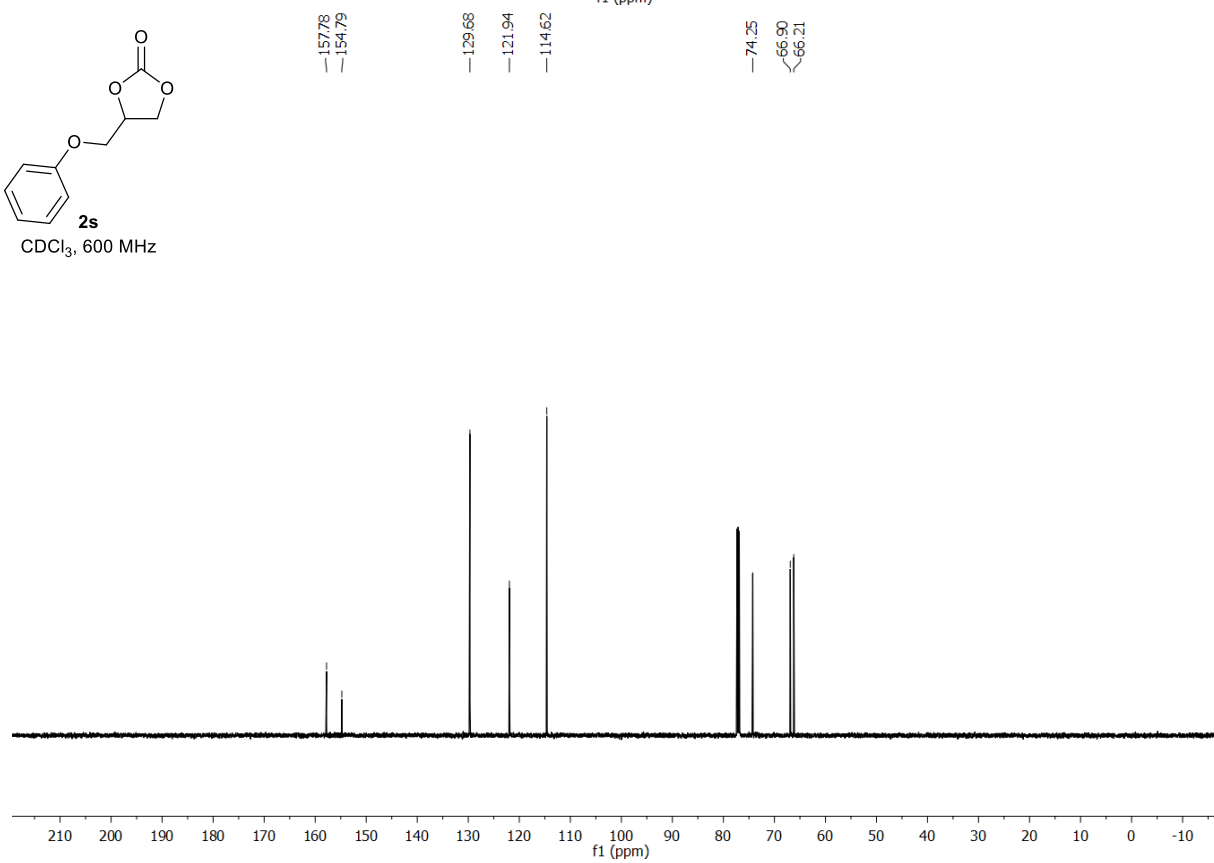

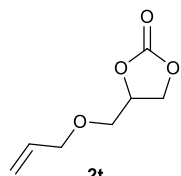

CDCl<sub>3</sub>, 600 MHz

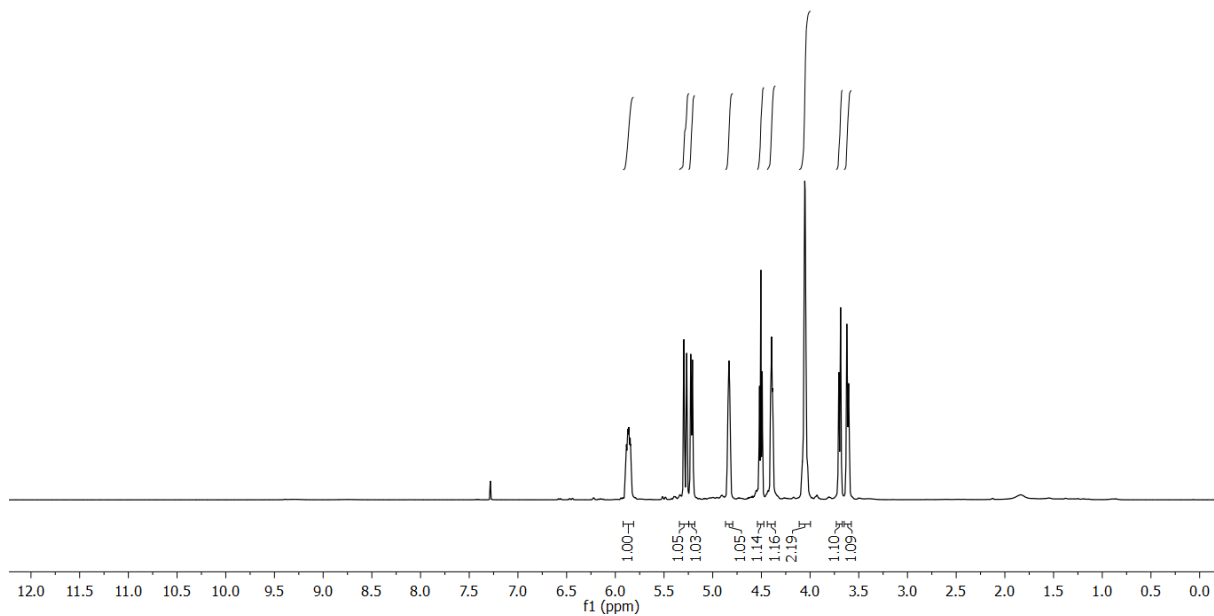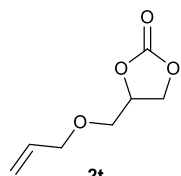

CDCl<sub>3</sub>, 151 MHz

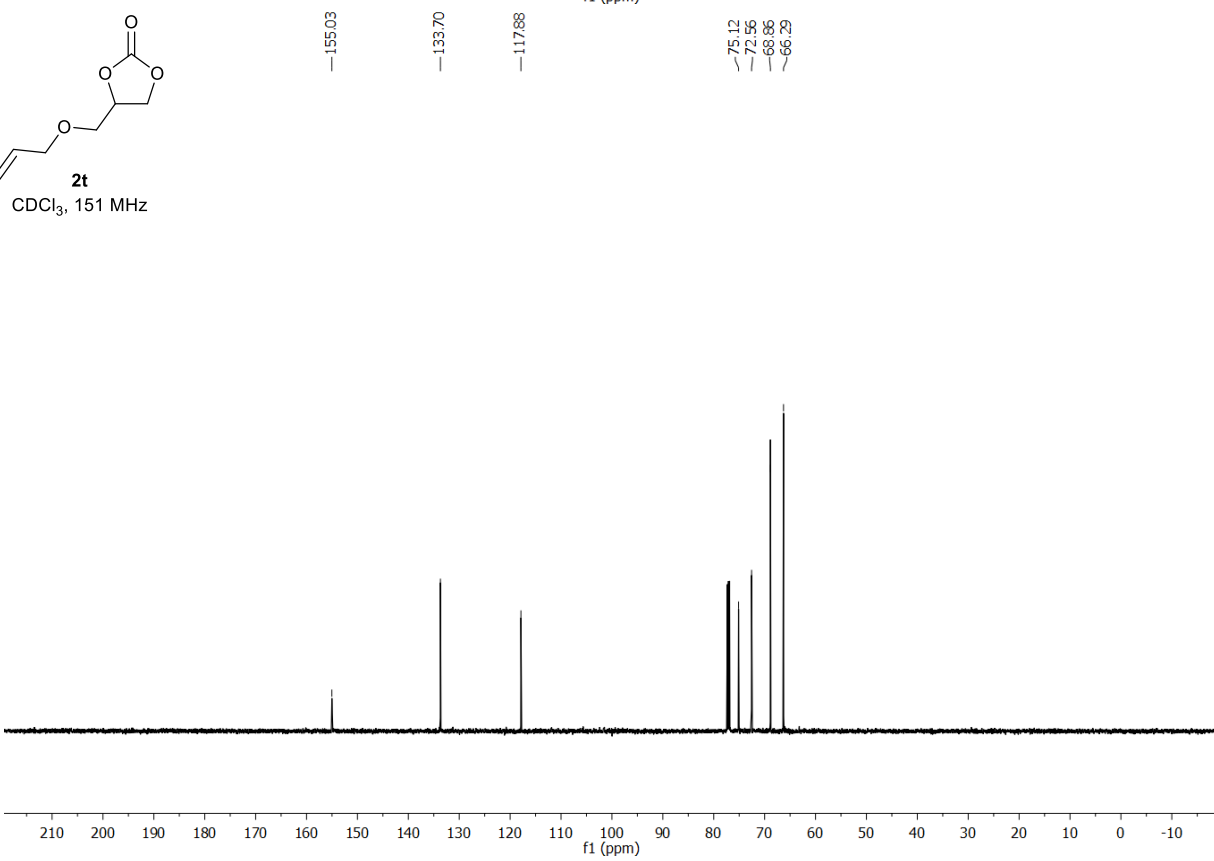

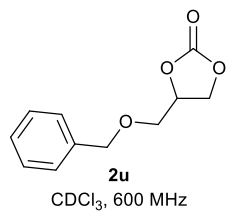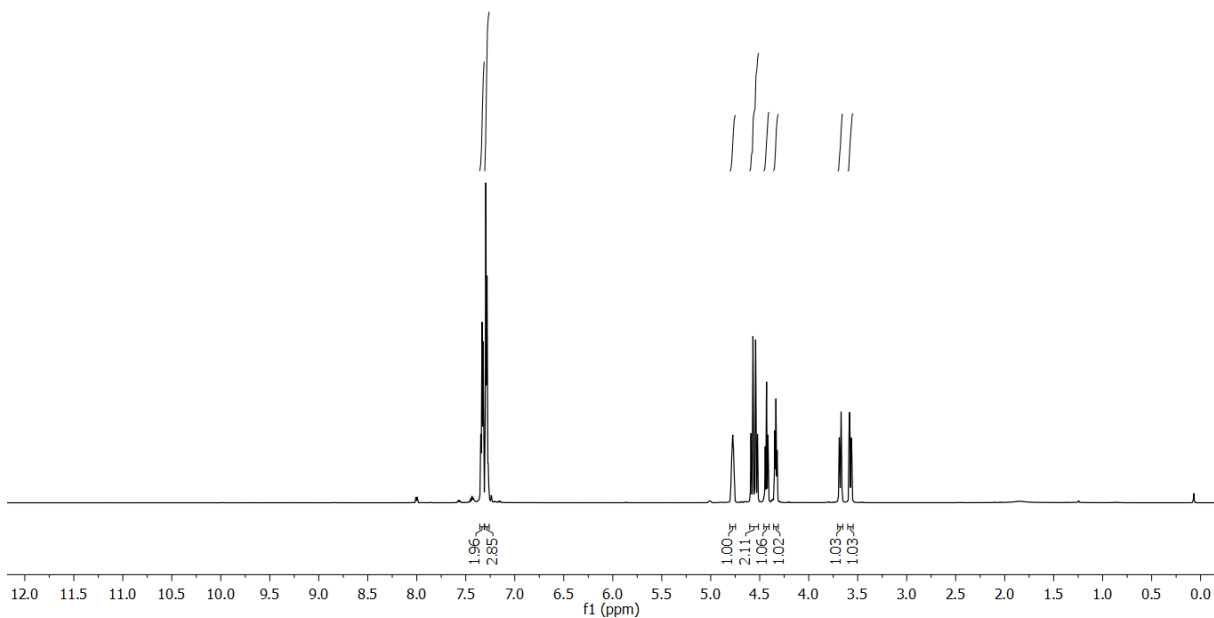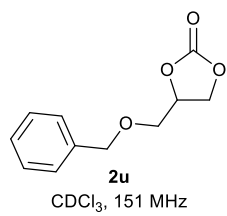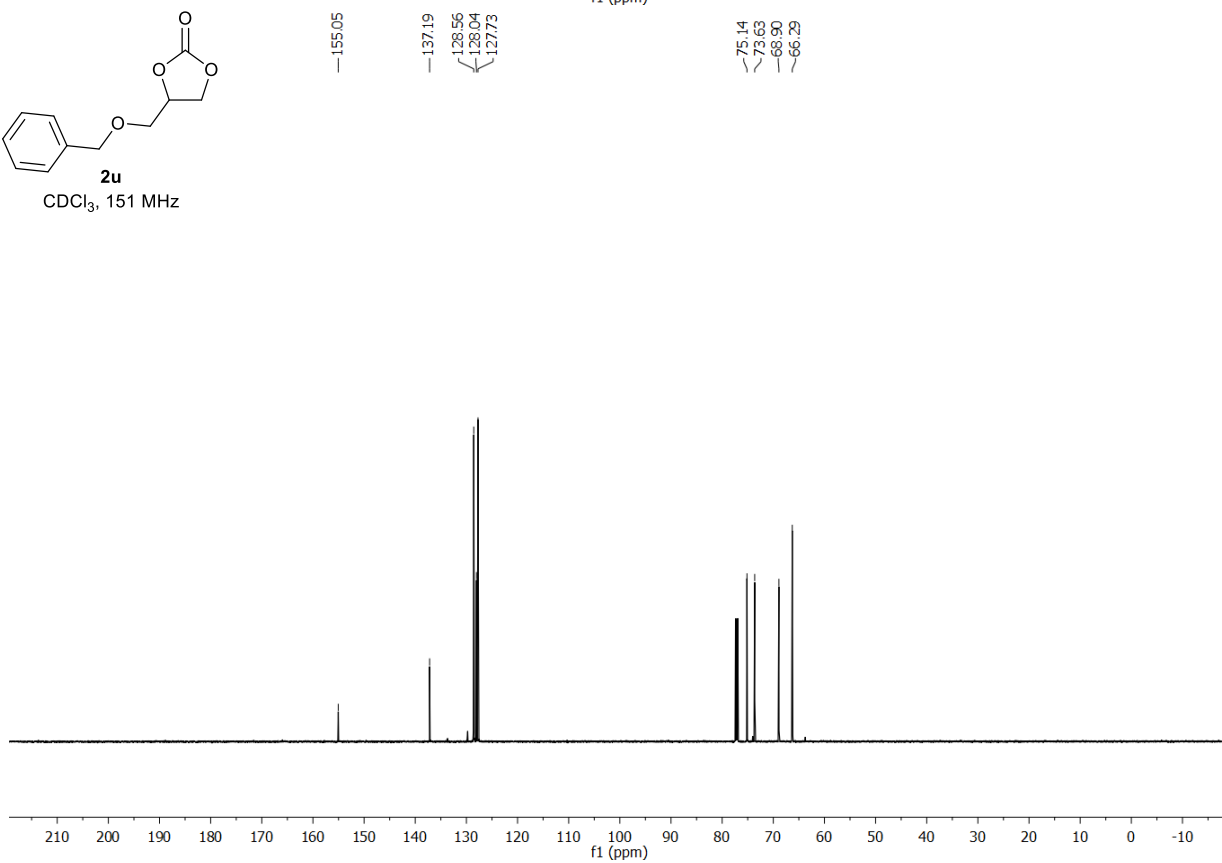

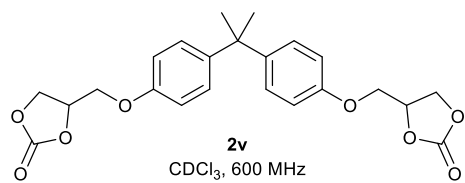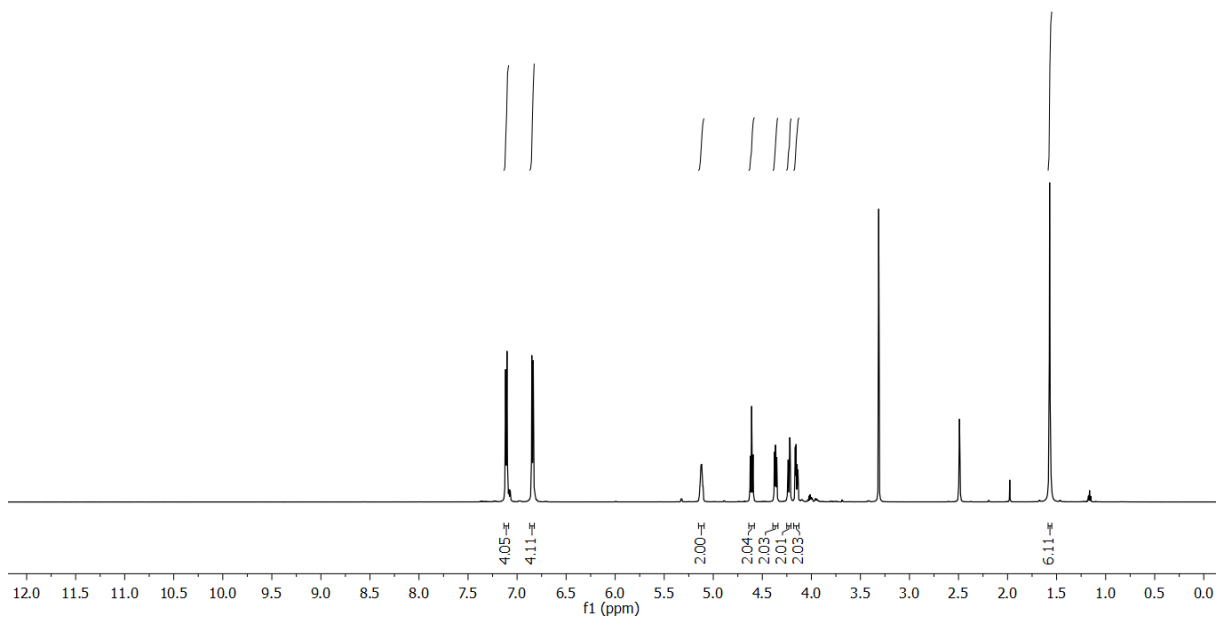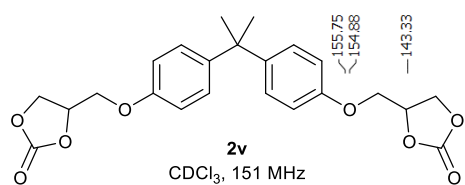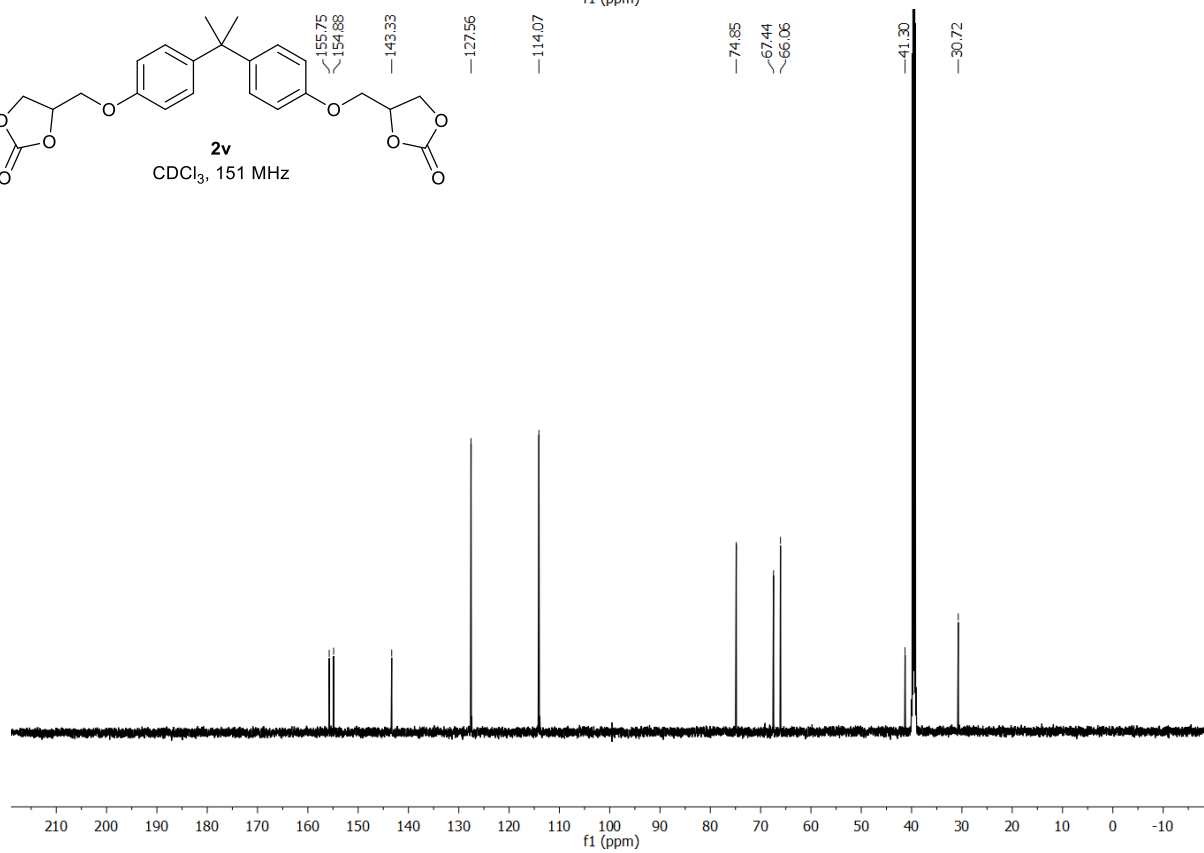

Supplement: d2gc02146c1.pdf [file d2gc02146c1.pdf]
